# Supplementary material for: Molecular Pathological Diagnosis of Thyroid Tumors Using Spatially Resolved Metabolomics
Source: MDPI journal article supplement (doi:10.3390/molecules27041390), 2022-02-18
Supplement: s1 [file s1]

# **Supplementary Information for**

## **Molecular pathological diagnosis of thyroid tumors using spatially resolved metabolomics**

LuoJiao Huang<sup>1, ‡</sup>, Xinxin Mao<sup>2, ‡</sup>, Chenglong Sun<sup>1</sup>, Tiegang Li<sup>1</sup>, Xiaowei Song<sup>1</sup>, Jiangshuo Li<sup>1</sup>, Shanshan Gao<sup>1</sup>, Ruiping Zhang<sup>1, 4</sup>, Jie Chen<sup>2, \*</sup>, Jiuming He<sup>1, 4, \*</sup>, and Zeper Abliz<sup>1, 3</sup>

1. State Key Laboratory of Bioactive Substance and Function of Natural Medicines, Institute of Materia Medica, Chinese Academy of Medical Sciences and Peking Union Medical College, Beijing 100050, China.

2. Department of Pathology, Peking Union Medical College Hospital, Chinese Academy of Medical Sciences and Peking Union Medical College, Beijing 100730, China.

3. Center for Imaging and Systems Biology and School of Pharmacy, Minzu University of China, Beijing 100081, China.

4. NMPA Key laboratory for safety research and evaluation of innovative drug, Institute of Materia Medica, Chinese Academy of Medical Sciences and Peking Union Medical College, Beijing 100050, China.

‡ These authors contributed equally to this work.

\* Corresponding Authors

To whom correspondence may be addressed. Email: hejiuming@imm.ac.cn.

### **File ‘Supplementary information\_I’ includes:**

Supplementary text

Figures S1 to S8

Tables S1 to S12

Appendix

SI References

## Contents

|                                                                                                                                                                                                                                             |    |
|---------------------------------------------------------------------------------------------------------------------------------------------------------------------------------------------------------------------------------------------|----|
| 1. Experimental details.....                                                                                                                                                                                                                | 4  |
| 1.1 Thyroid tumor sample information.....                                                                                                                                                                                                   | 4  |
| Table S1 Clinical pathological information of collected thyroid tumors .....                                                                                                                                                                | 4  |
| 1.2 AFADESI-MSI experiment.....                                                                                                                                                                                                             | 4  |
| Table S2 Parameters of AFADESI-MSI platform for <i>in-situ</i> analysis.....                                                                                                                                                                | 4  |
| Table S3 Acquisition parameters of Q Exactive mass spectrometer.....                                                                                                                                                                        | 4  |
| 1.3 Data processing for screening differential variables.....                                                                                                                                                                               | 5  |
| 1.4 Sample pretreatment method for metabolite identification .....                                                                                                                                                                          | 5  |
| 1.5 Analytical method for metabolite identification .....                                                                                                                                                                                   | 5  |
| Table S4 Acquisition parameters of Q-Orbitrap spectrometer in LC-MS/MS.....                                                                                                                                                                 | 6  |
| 2. Results .....                                                                                                                                                                                                                            | 6  |
| 2.1 Figures and Tables .....                                                                                                                                                                                                                | 6  |
| Figure S1. Illustration of drawing a rectangular box to define the scan area of a tissue section.....                                                                                                                                       | 6  |
| Figure S2. Model classification result of discovery set .....                                                                                                                                                                               | 7  |
| Figure S3. Model classification result of validation set .....                                                                                                                                                                              | 8  |
| Figure S4. Model classification result for FA and FTC .....                                                                                                                                                                                 | 9  |
| Figure S5. The biomarker panel for diagnosis between benign FA, malignant cvPTC and fvPTC in the validation set.....                                                                                                                        | 10 |
| Figure S6. Fold change of differential metabolites in discriminating FA and FTC. ....                                                                                                                                                       | 11 |
| Figure S7. Predictive analysis of each test sample based on the diagnostic OPLS-DA model compared with clinical pathological diagnosis. ....                                                                                                | 12 |
| Figure S8. Model prediction analysis of indeterminate case 'TC14'.....                                                                                                                                                                      | 13 |
| Table S5 Model cumulative R <sup>2</sup> X、R <sup>2</sup> Y and Q <sup>2</sup> (cum) and Intercepts of R <sup>2</sup> and Q <sup>2</sup> in one hundred times permutations of each classification model between thyroid tumor subtypes..... | 14 |
| Table S6 Reproducible differential variables for benign (FA) and malignant thyroid tumor (cvPTC, fvPTC).....                                                                                                                                | 15 |
| Table S7. Reproducible differential variables for benign (FA) and malignant thyroid tumor (FTC) .....                                                                                                                                       | 17 |

|                                                                                                                                     |    |
|-------------------------------------------------------------------------------------------------------------------------------------|----|
| Table S8 Identified biomarkers for diagnosis between benign (FA) and malignant thyroid tumor (cvPTC, fvPTC).....                    | 18 |
| Table S9 Identified biomarkers for diagnosis between follicular adenoma (FA) and follicular thyroid cancer (FTC).....               | 20 |
| Table S10 Receiver operating characteristic curves (ROC) analysis result of potential diagnostic biomarkers .....                   | 22 |
| Table S11 Predictive score results of suspicious focuses in indeterminate case 'TC14' based on OPLS-DA model .....                  | 23 |
| Table S12 A summary of diagnostic studies performed on thyroid tumor using mass spectrometry imaging technique <sup>[1]</sup> ..... | 24 |
| Supplementary Appendix .....                                                                                                        | 26 |
| Metabolite identification.....                                                                                                      | 26 |
| (1) Metabolite identification of 8,9-dihydroxynonanoic acid .....                                                                   | 26 |
| (2) Metabolite identification by standards.....                                                                                     | 27 |
| SI References.....                                                                                                                  | 52 |

## 1. Experimental details

### 1.1 Thyroid tumor sample information

**Table S1 Clinical pathological information of collected thyroid tumors**

| Pathological Type   | Number | M / F | Median Age |
|---------------------|--------|-------|------------|
| FA                  | 22     | 1:3   | 47         |
| FTC                 | 5      | 1:2.2 | 47         |
| cvPTC               | 19     |       |            |
| fvPTC               | 28     |       |            |
| follicular neoplasm | 2      | 1:1.5 | 39         |
| NG                  | 6      |       |            |

### 1.2 AFADESI-MSI experiment

Detailed parameters of the AFADESI-MSI platform are shown in the below tables, including ambient ion source, moving stage and mass analyzer.

**Table S2 Parameters of AFADESI-MSI platform for *in-situ* analysis**

| Parameters                          | Value            |
|-------------------------------------|------------------|
| Spray voltage                       | 7000 V (−7000 V) |
| Tube voltage                        | 3000 V (−3000 V) |
| Spray gas pressure                  | 80 MPa           |
| Spray angle                         | 60°              |
| Distance from sprayer to surface    | 0.7 mm           |
| Distance from spray to guide tube   | 3 mm             |
| Distance from orifice to guide tube | 10 mm            |
| Extracting gas                      | 45 L/min         |
| X axis move speed                   | 0.2 mm/s         |
| Y axis step size                    | 0.2 mm           |

**Table S3 Acquisition parameters of Q Exactive mass spectrometer**

| Parameters                 | Value                              |
|----------------------------|------------------------------------|
| Spray solvent              | ACN : H <sub>2</sub> O = 8:2 (V/V) |
| Solvent flow rate          | 5 µL/min                           |
| Scan mode                  | Full MS                            |
| Scan range                 | 100-1000 Da                        |
| Maximum inject time        | 200 ms                             |
| AGC target                 | 3e6                                |
| Resolution                 | 70000                              |
| Scan rate                  | around 2.0 scans/sec               |
| Sheath gas flow rate       | 0                                  |
| Aux gas flow rate          | 0                                  |
| Sweep gas flow rate        | 0                                  |
| Capillary temperature      | 350 °C                             |
| Aux gas heater temperature | 0                                  |

### **1.3 Data processing for screening differential variables**

- (1) The value of variable importance (VIP) was set above 1, which reflected the influence of each variable on classification and did Jack-knifed confidence interval analysis.
- (2) The significance of each differential variable was assessed using an independent t-test (SPSS Statistics 17.0.1, USA). Statistically differential variables were determined with a p-value less than 0.05.
- (3) Actual variations between groups were observed by creating a line plot for each potential biomarker in SIMCA, which ruled out anomalous changes caused by only one sample within one group.
- (4) Retrospective imaging tests in MassImager were used to further validate whether their ion images showed relevant contours to the shape of tissue sections.

### **1.4 Sample pretreatment method for metabolite identification**

- (1) Thyroid tumor tissues (FA, FTC, cvPTC, fvPTC) were weighed at 100 mg, cut into small pieces, and placed in a 2 mL homogenization tube. 400  $\mu$ L 4°C water and three ceramic beads (3.0 mm in diameter) were added into the tube.
- (2) Homogenization tubes were fixed in a tissue homogenizer (MasterPrep™-24). The homogenization parameters were set as follows: frequency 30 s/time, speed 4.0 m/s, interval time 30 s, repeat 4 times.
- (3) 100  $\mu$ L of homogenate was pipetted into a clean 1.5mL EP tube, followed by 400  $\mu$ L of acetonitrile. To precipitate protein, samples were mixed for 2 minutes before being centrifuged at 10,000 rpm for 5 minutes at 4°C.
- (4) Supernatant was transferred into a new clean 1.5 mL EP tube and dried for about 2 h using a speed vacuum concentrator (Savant SPD121P-230 SpeedVac, Thermo Fisher Scientific, USA). Extracts were redissolved in 100  $\mu$ L solvent of ACN/0.1%FA·H<sub>2</sub>O (2:98). 50  $\mu$ L of each type of tumor extract was pipetted to make the final pooled extract.

### **1.5 Analytical method for metabolite identification**

Metabolites were separated on a Waters UPLC HSS T3 column (1.8  $\mu$ m, 2.1×100 mm) at room temperature. Aqueous 0.1% formic acid and acetonitrile were selected as mobile phase with linear gradient elution at the flow velocity of 0.25 mL/min. The linear gradient elution procedure is as follows: Equilibrium for 8 minutes (2% acetonitrile), 0-9 minutes (2% acetonitrile to 60% acetonitrile), 9-18 minutes (60% acetonitrile), 18-20 minutes (60% acetonitrile to 100% acetonitrile), 20-27 minutes (100% acetonitrile). Full MS and PRM scan mode in both positive and negative ion modes were used in mass spectrometric analysis.

**Table S4 Acquisition parameters of Q-Orbitrap spectrometer in LC-MS/MS**

| Parameters           | Value            |
|----------------------|------------------|
| Spray voltage        | 3500 V (-3500 V) |
| Capillary temp       | 350 °C           |
| Sheath gas flow rate | 40 psi           |
| Aux gas heater temp  | 220 °C           |
| S-Lens RF level      | 55               |
| Solvent flow rate    | 0.25 mL/min      |
| Scan mode            | Full MS, PRM     |
| Scan range           | 70-1000 Da       |
| Maximum inject time  | 100 ms           |
| AGC target           | 3e6, 1e6         |
| Resolution           | 35000, 17500     |
| N(CE)/ stepped N(CE) | nce: 25, 30, 35  |

## 2. Results

### 2.1 Figures and Tables

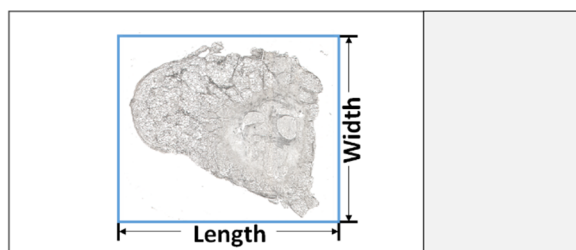

**Figure S1. Illustration of drawing a rectangular box to define the scan area of a tissue section**

The sample shown in the figure was measured with a length of 19 mm, width of 17 mm, The calculated scanning time for each row was 95 s, and the total row count was 85. The total analytical time for this sample was 2.24 hours.

## Pairwise statistical classification modeling of three thyroid tumor types: FA, cvPTC and fvPTC

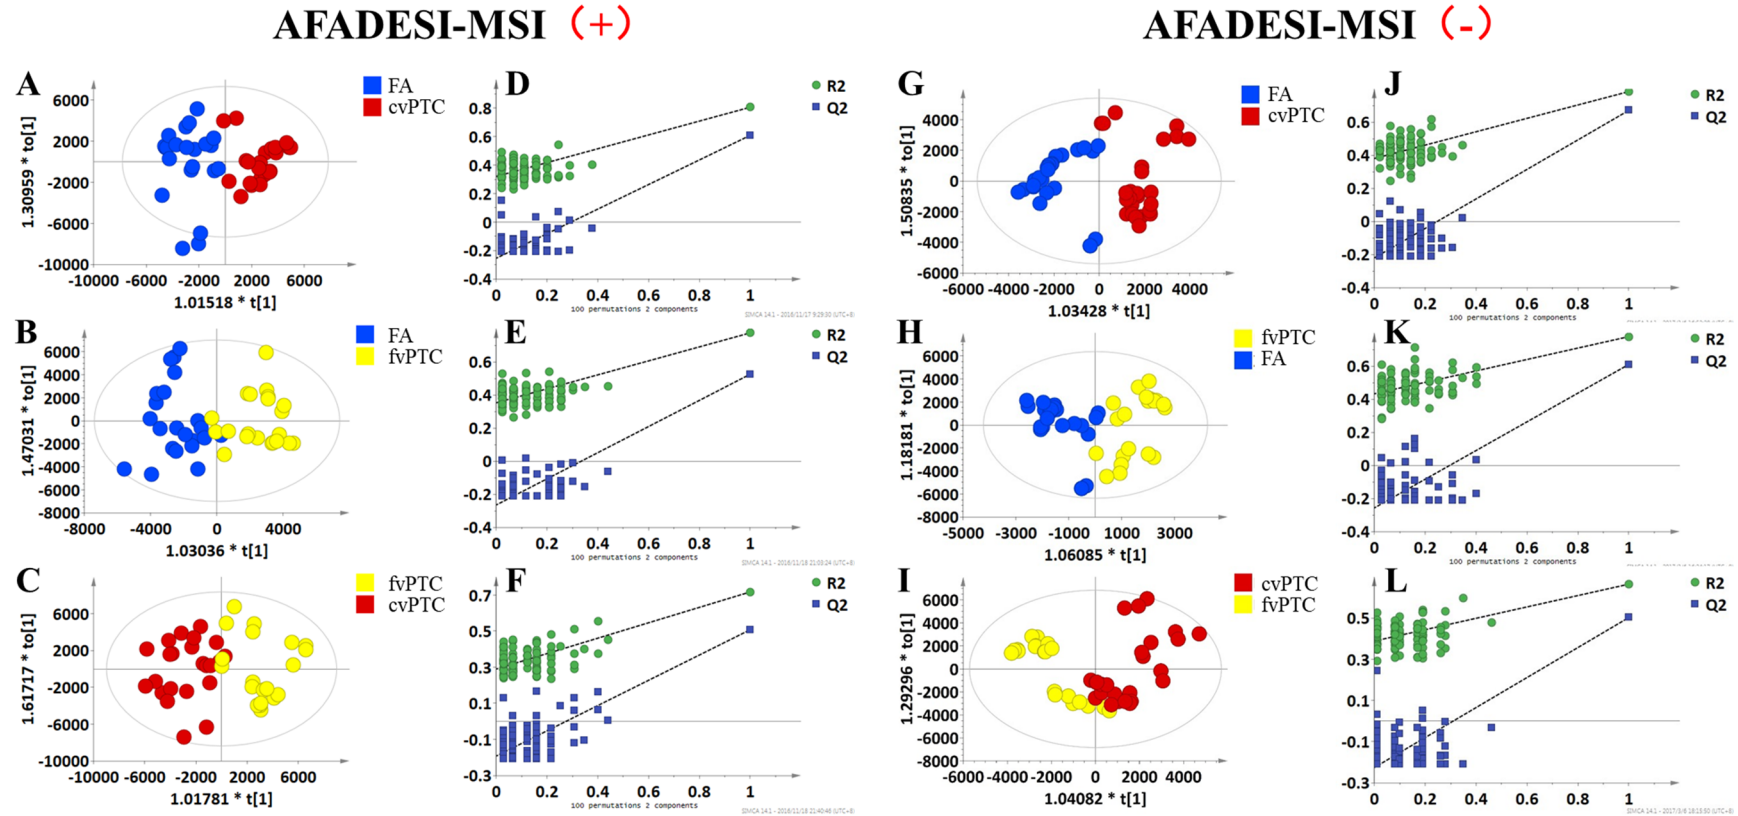

**Figure S2. Model classification result of discovery set**

(A) (B) (C) score plot of OPLS-DA analysis between FA, cvPTC, fvPTC in positive scan mode; (G) (H) (I) score plot of OPLS-DA analysis between FA, cvPTC, fvPTC in negative scan mode; (D) (E) (F) (J) (K) (L) 100 permutation test results of the corresponding OPLS-DA score plot. FA: follicular adenoma; cvPTC: classical variant of papillary thyroid cancer; fvPTC: follicular variant of papillary thyroid cancer.

## AFADESI-MSI (+)

## AFADESI-MSI (-)

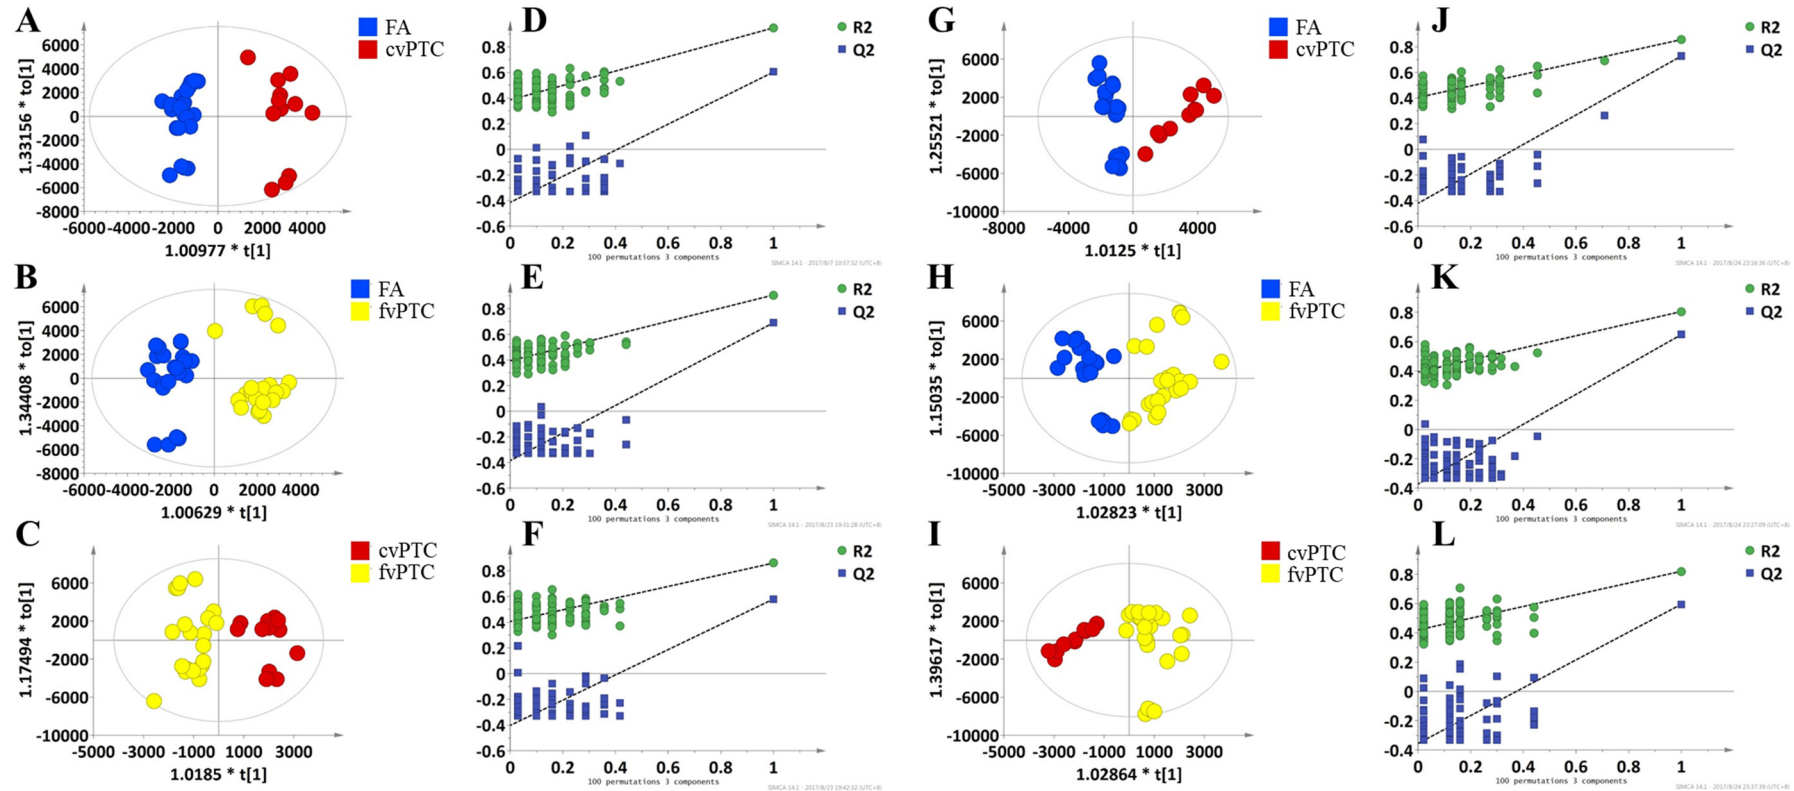

**Figure S3. Model classification result of validation set**

(A) (B) (C) score plot of OPLS-DA analysis between FA, cvPTC, fvPTC in positive scan mode; (G) (H) (I) score plot of OPLS-DA analysis between FA, cvPTC, fvPTC in negative scan mode; (D) (E) (F) (J) (K) (L) 100 permutation test results of the corresponding OPLS-DA score plot. FA: follicular adenoma; cvPTC: classical variant of papillary thyroid cancer; fvPTC: follicular variant of papillary thyroid cancer.



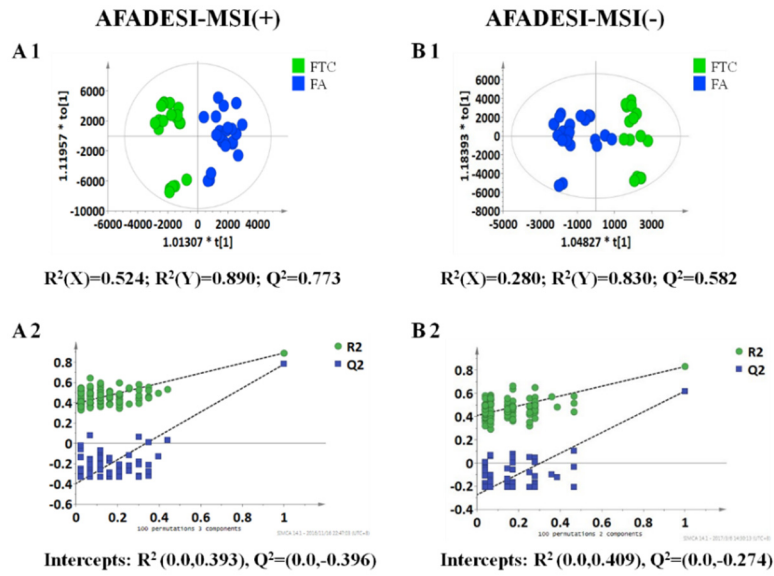

**Figure S4. Model classification result for FA and FTC**

A1, B1: Score plot of OPLS-DA analysis under positive scan mode and negative scan mode;

A2, B2: 100 random permutation test results in positive scan mode and negative scan mode.

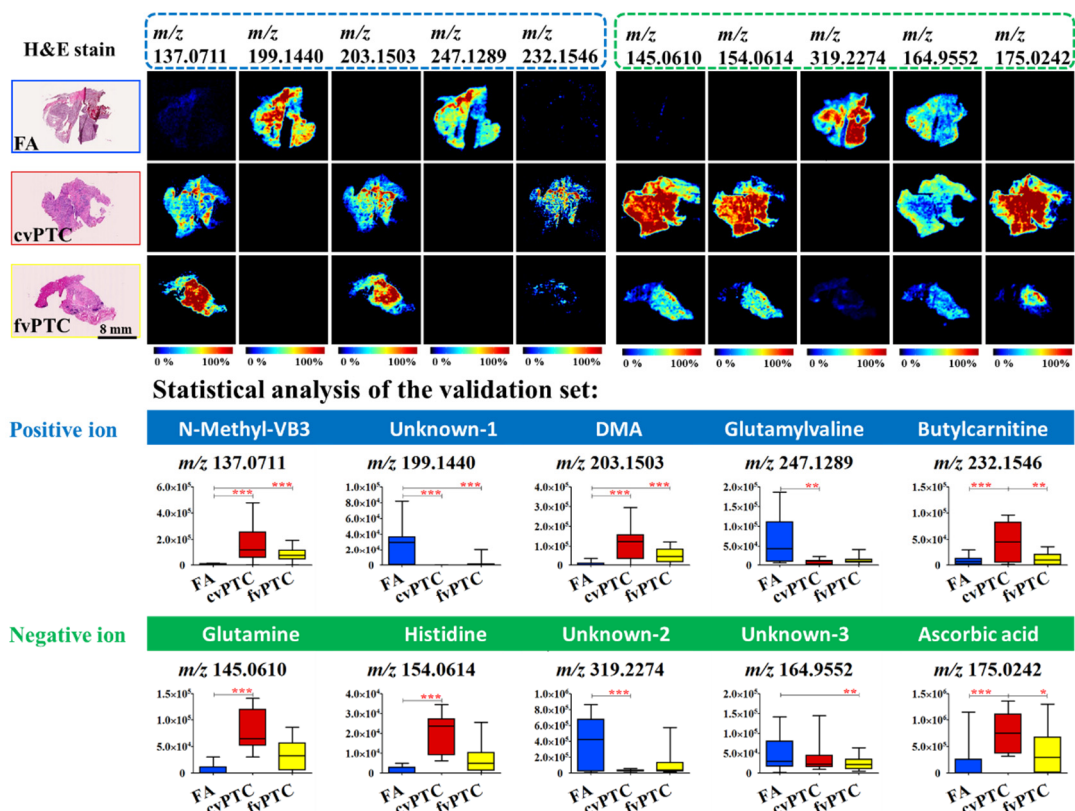

**Figure S5. The biomarker panel for diagnosis between benign FA, malignant cvPTC and fvPTC in the validation set.**

The upper part is the in-situ visualization in different types of thyroid tumor tissue and the lower part is the statistical analysis of each biomarker in box plot. (\*\*p < 0.001, \*p < 0.02)

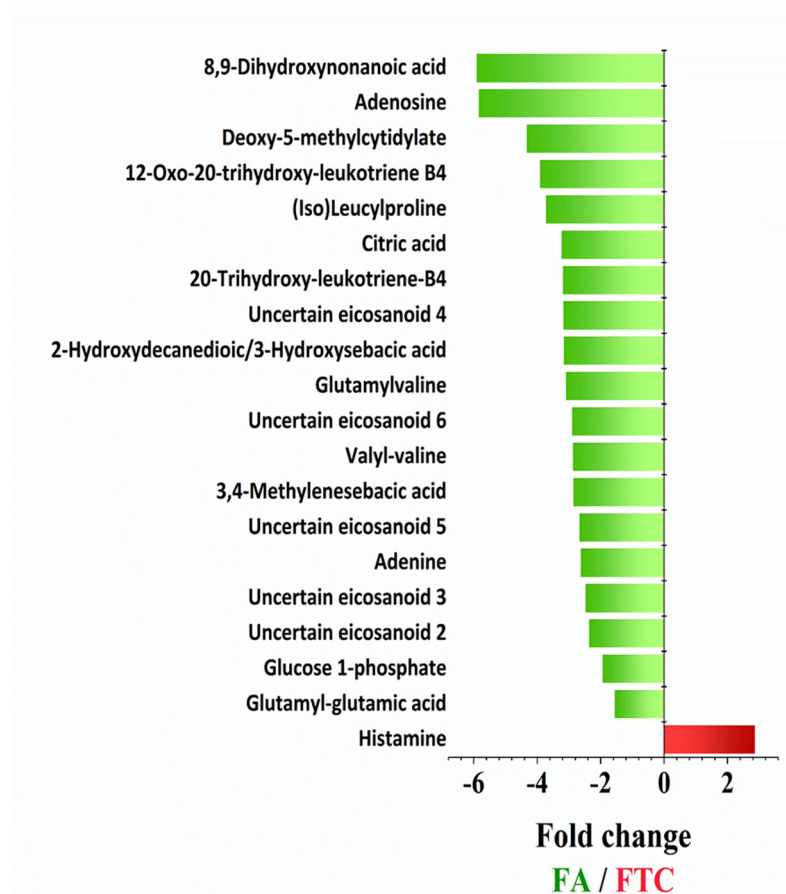

Figure S6. Fold change of differential metabolites in discriminating FA and FTC.

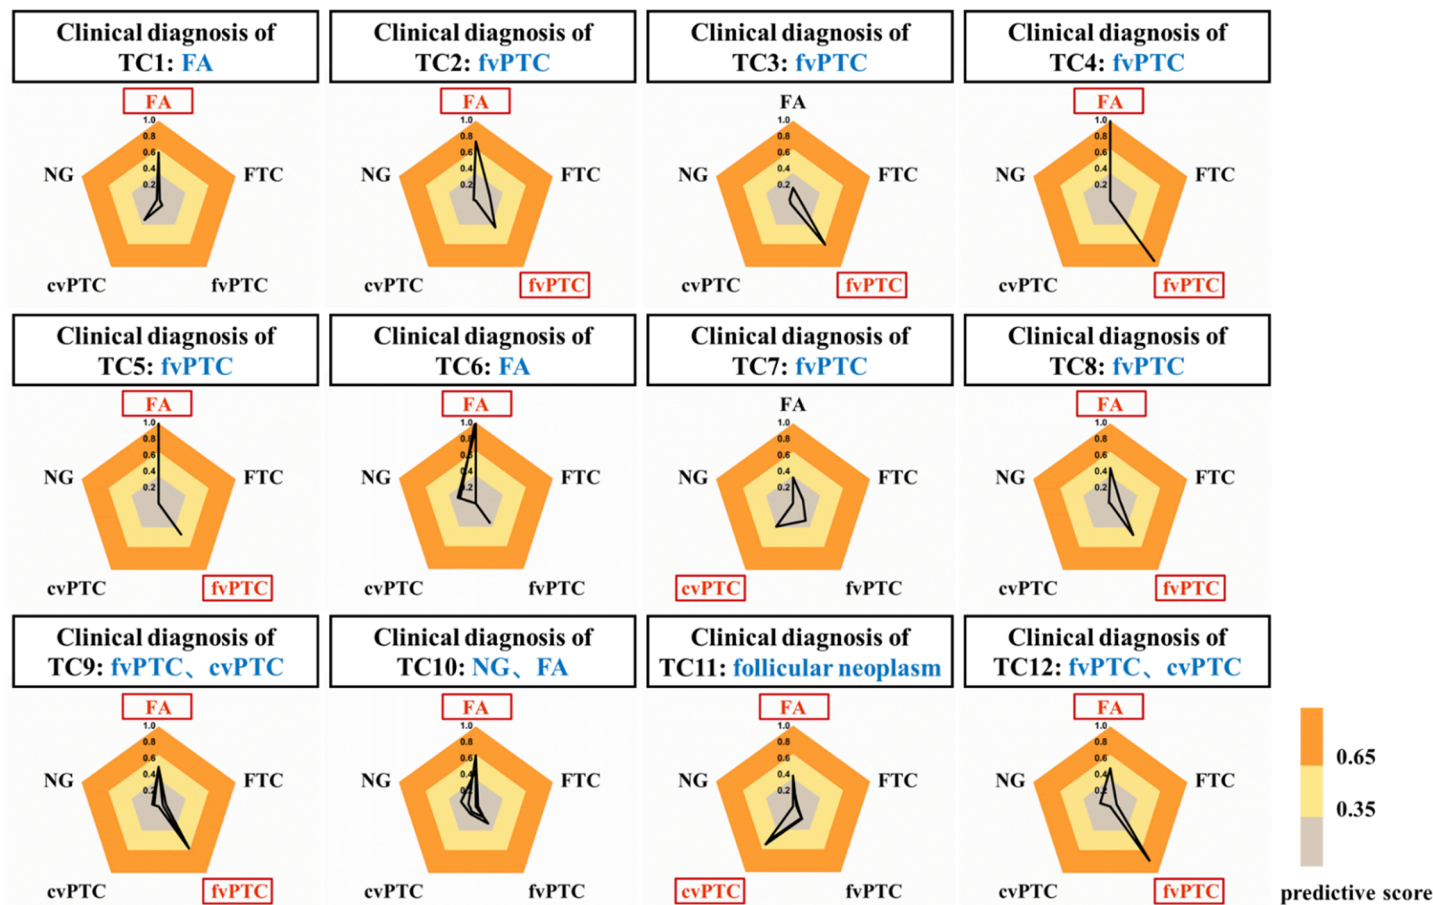

**Figure S7. Predictive analysis of each test sample based on the diagnostic OPLS-DA model compared with clinical pathological diagnosis.**

The average predicted value was calculated from both results under positive and negative model. If the predicted value is below 0.35, it means it is unlikely to be this class; If the predicted value is between 0.35 and 0.65, it is possible to be this class; if the predicted value is greater than 0.65, it is highly possible to be this class. Malignancy is the basic output if having both benign and malignant predictions.

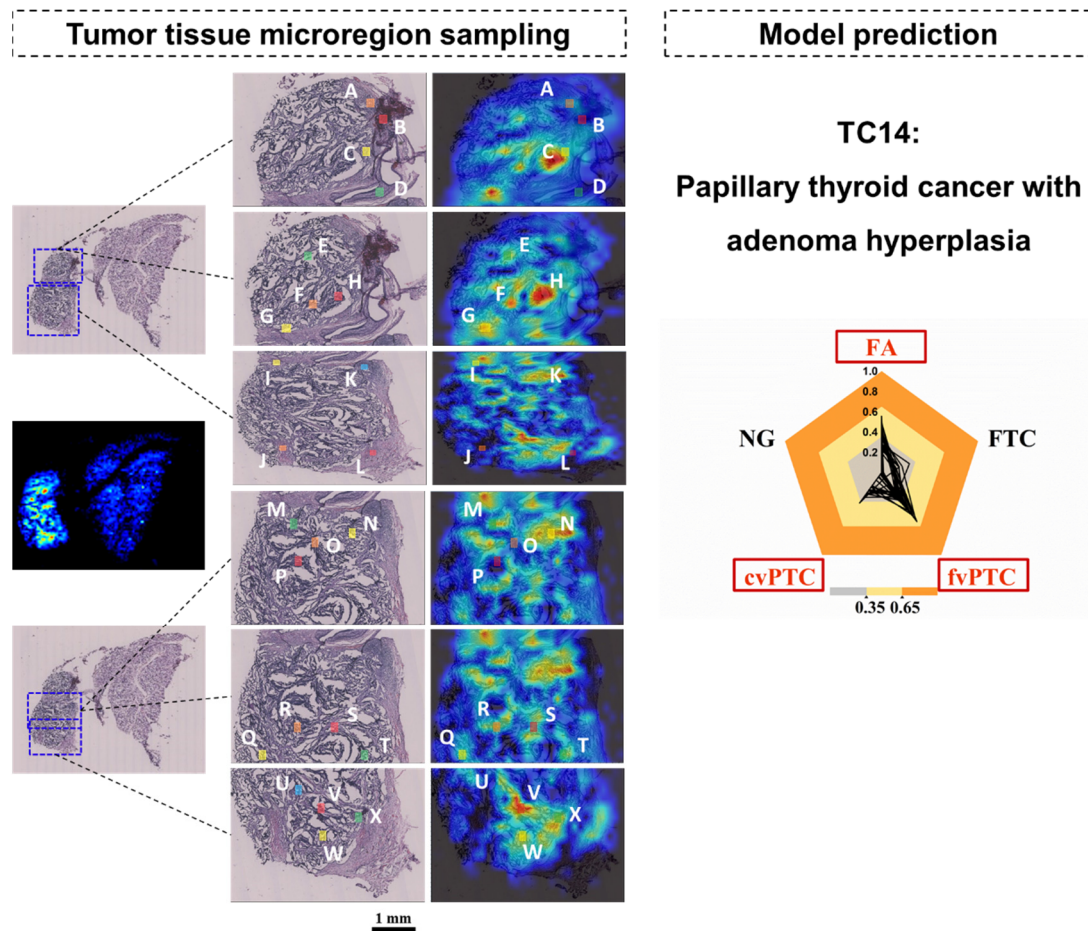

**Figure S8. Model prediction analysis of indeterminate case ‘TC14’.**

Microregion with suspicious foci were delineated on an enlarged view of the H&E staining image. Underneath is the MSI image. The result of computationally predicted value from the integrated model prediction (positive and negative) was shown on the right. The predicted value below 0.35: it does not belong to this classification; The predicted value between 0.35~0.65: it may belong to this classification; The predicted value above 0.65: it belongs to this classification. Malignancy is the basic output if having both benign and malignant predictions.

**Table S5 Model cumulative R<sup>2</sup>X, R<sup>2</sup>Y and Q<sup>2</sup>(cum) and Intercepts of R<sup>2</sup> and Q<sup>2</sup> in one hundred times permutations of each classification model between thyroid tumor subtypes**

| Group                 | Batch analysis | Scan mode | R <sup>2</sup> X | R <sup>2</sup> Y | Q <sup>2</sup> (cum) | R <sup>2</sup> | Q <sup>2</sup> |
|-----------------------|----------------|-----------|------------------|------------------|----------------------|----------------|----------------|
| <b>FA vs cvPTC</b>    | Discovery      | positive  | 0.360            | 0.806            | 0.659                | 0.321          | -0.254         |
|                       |                | negative  | 0.350            | 0.783            | 0.663                | 0.380          | -0.221         |
|                       | Validation     | positive  | 0.448            | 0.947            | 0.760                | 0.386          | -0.414         |
|                       |                | negative  | 0.562            | 0.855            | 0.738                | 0.400          | -0.420         |
| <b>FA vs fvPTC</b>    | Discovery      | positive  | 0.292            | 0.775            | 0.593                | 0.352          | -0.265         |
|                       |                | negative  | 0.304            | 0.777            | 0.602                | 0.432          | -0.257         |
|                       | Validation     | positive  | 0.507            | 0.906            | 0.718                | 0.394          | -0.384         |
|                       |                | negative  | 0.468            | 0.805            | 0.647                | 0.392          | -0.371         |
| <b>fvPTC vs cvPTC</b> | Discovery      | positive  | 0.438            | 0.717            | 0.508                | 0.290          | -0.192         |
|                       |                | negative  | 0.376            | 0.665            | 0.510                | 0.389          | -0.226         |
|                       | Validation     | positive  | 0.544            | 0.859            | 0.581                | 0.400          | -0.402         |
|                       |                | negative  | 0.526            | 0.820            | 0.644                | 0.420          | -0.354         |
| <b>FA vs FTC</b>      | Discovery      | positive  | 0.524            | 0.890            | 0.773                | 0.393          | -0.396         |
|                       |                | negative  | 0.280            | 0.830            | 0.582                | 0.409          | -0.274         |

**Table S6 Reproducible differential variables for benign (FA) and malignant thyroid tumor (cvPTC↔fvPTC)**

| Differential variables between FA and cvPTC |           |        |        |           |           |       |         |
|---------------------------------------------|-----------|--------|--------|-----------|-----------|-------|---------|
| m/z                                         | scan mode | VIP* 1 | VIP* 2 | p value 1 | p value 2 | FC* 1 | FC* 2   |
| 114.0665                                    | positive  | 1.41   | 2.26   | 1.07E-05  | 2.47E-04  | 0.14  | 0.12    |
| 118.0872                                    | positive  | 2.40   | 3.15   | 4.76E-07  | 3.67E-05  | 0.18  | 0.11    |
| 127.1232                                    | positive  | 6.04   | 2.36   | 5.87E-10  | 2.25E-02  | 0.14  | 0.43    |
| 137.0458                                    | positive  | 4.36   | 5.83   | 2.68E-08  | 6.55E-05  | 0.28  | 0.30    |
| 137.0711                                    | positive  | 3.38   | 5.14   | 5.18E-09  | 5.47E-06  | 0.10  | 0.04    |
| 139.1230                                    | positive  | 3.30   | 2.01   | 1.96E-07  | 6.44E-04  | 0.17  | 0.44    |
| 141.1134                                    | positive  | 2.88   | 4.97   | 2.66E-02  | 2.25E-02  | 29.40 | 7737.55 |
| 148.0038                                    | positive  | 1.43   | 2.40   | 1.20E-08  | 9.00E-08  | 0.14  | 0.08    |
| 152.0233                                    | positive  | 1.05   | 1.35   | 4.40E-06  | 3.94E-04  | 0.16  | 0.17    |
| 155.1290                                    | positive  | 9.00   | 8.62   | 1.41E-04  | 4.25E-04  | 13.17 | 4436.39 |
| 159.0277                                    | positive  | 2.81   | 4.51   | 1.03E-05  | 6.98E-04  | 0.43  | 0.39    |
| 162.1123                                    | positive  | 12.64  | 9.31   | 1.04E-04  | 2.52E-04  | 0.25  | 0.32    |
| 169.0583                                    | positive  | 1.14   | 2.07   | 8.14E-11  | 5.19E-06  | 0.06  | 0.11    |
| 175.0015                                    | positive  | 3.84   | 5.16   | 2.87E-04  | 3.99E-04  | 0.29  | 0.30    |
| 175.1190                                    | positive  | 3.82   | 8.39   | 1.86E-04  | 2.72E-06  | 0.10  | 0.15    |
| 199.1440                                    | positive  | 3.28   | 1.77   | 2.90E-07  | 2.46E-04  | 13.00 | 461.38  |
| 203.1503                                    | positive  | 2.42   | 4.34   | 4.81E-04  | 2.69E-06  | 0.07  | 0.05    |
| 204.1230                                    | positive  | 10.87  | 9.66   | 3.09E-05  | 7.64E-06  | 0.11  | 0.12    |
| 232.1546                                    | positive  | 2.97   | 2.32   | 9.71E-05  | 2.17E-04  | 0.21  | 0.19    |
| 239.2229                                    | positive  | 1.21   | 2.94   | 5.24E-06  | 1.34E-05  | 0.18  | 0.18    |
| 247.1289                                    | positive  | 1.67   | 2.29   | 1.12E-04  | 2.21E-03  | 9.79  | 6.91    |
| 307.0436                                    | positive  | 3.84   | 4.12   | 1.90E-03  | 3.87E-03  | 0.36  | 0.36    |
| 317.2081                                    | positive  | 2.41   | 1.38   | 1.53E-03  | 4.14E-03  | 5.62  | 20.44   |
| 319.2240                                    | positive  | 1.72   | 1.35   | 2.40E-03  | 8.98E-03  | 4.24  | 26.01   |
| 333.2030                                    | positive  | 2.18   | 1.22   | 5.86E-04  | 8.16E-04  | 6.57  | 50.45   |
| 335.2190                                    | positive  | 2.35   | 1.74   | 1.33E-03  | 3.54E-04  | 4.25  | 18.06   |
| 359.2188                                    | positive  | 1.76   | 1.06   | 4.80E-06  | 1.23E-03  | 9.25  | 225.71  |
| 483.0757                                    | positive  | 3.88   | 7.35   | 1.45E-03  | 4.84E-04  | 0.54  | 0.51    |
| 124.0056                                    | negative  | 8.21   | 7.34   | 2.18E-07  | 3.22E-10  | 0.13  | 0.09    |
| 126.0016                                    | negative  | 1.69   | 1.52   | 3.70E-07  | 5.83E-10  | 0.07  | 0.03    |
| 132.0107                                    | negative  | 3.12   | 3.04   | 2.00E-08  | 7.01E-10  | 0.10  | 0.13    |
| 135.0295                                    | negative  | 6.52   | 3.33   | 2.54E-06  | 3.67E-04  | 0.19  | 0.53    |
| 145.0602                                    | negative  | 3.43   | 3.45   | 1.94E-06  | 1.51E-09  | 0.08  | 0.08    |
| 146.0442                                    | negative  | 7.52   | 7.24   | 7.70E-06  | 5.49E-08  | 0.11  | 0.15    |
| 164.0701                                    | negative  | 1.73   | 2.19   | 1.46E-05  | 2.04E-11  | 0.14  | 0.13    |
| 174.0394                                    | negative  | 10.79  | 4.31   | 2.67E-03  | 1.08E-07  | 0.39  | 0.09    |
| 175.0233                                    | negative  | 20.76  | 8.34   | 2.24E-05  | 5.56E-04  | 0.21  | 0.27    |
| 226.9955                                    | negative  | 7.27   | 2.14   | 1.44E-04  | 1.62E-03  | 0.24  | 0.31    |
| 293.2119                                    | negative  | 5.04   | 5.48   | 1.48E-03  | 2.16E-03  | 2.83  | 12.44   |
| 295.2272                                    | negative  | 6.13   | 7.03   | 1.53E-03  | 5.89E-03  | 2.96  | 8.17    |
| 309.2067                                    | negative  | 4.49   | 4.20   | 2.70E-04  | 2.19E-03  | 3.80  | 39.34   |
| 311.2224                                    | negative  | 6.94   | 8.54   | 8.93E-04  | 1.14E-03  | 3.12  | 28.97   |
| 317.2117                                    | negative  | 3.46   | 3.89   | 2.58E-06  | 9.05E-04  | 5.34  | 50.82   |
| 319.2274                                    | negative  | 4.91   | 6.88   | 1.57E-05  | 6.70E-04  | 3.88  | 13.29   |
| 327.2176                                    | negative  | 2.88   | 2.49   | 1.61E-04  | 1.43E-03  | 3.74  | 970.26  |
| 329.2331                                    | negative  | 3.07   | 3.56   | 2.20E-02  | 1.02E-02  | 2.54  | 40.73   |
| 331.1912                                    | negative  | 2.17   | 1.57   | 2.89E-06  | 4.22E-03  | 6.32  | ∞       |
| 333.2069                                    | negative  | 2.62   | 2.47   | 4.18E-07  | 6.94E-04  | 5.18  | 106.51  |
| 335.2226                                    | negative  | 4.47   | 6.10   | 4.75E-06  | 1.30E-03  | 4.31  | 37.99   |
| 337.2375                                    | negative  | 2.34   | 2.37   | 4.45E-06  | 4.02E-03  | 5.31  | 42.61   |
| 339.2532                                    | negative  | 1.71   | 1.62   | 3.51E-05  | 2.67E-02  | 9.10  | 92.57   |
| 345.2433                                    | negative  | 1.07   | 1.54   | 1.07E-02  | 1.11E-03  | 2.47  | 11.87   |
| 347.1990                                    | negative  | 1.49   | 1.29   | 8.61E-03  | 8.10E-03  | 3.18  | ∞       |
| 353.2327                                    | negative  | 2.85   | 3.28   | 1.82E-05  | 1.12E-03  | 4.21  | 70.74   |
| 367.2121                                    | negative  | 3.83   | 3.45   | 3.23E-06  | 4.94E-03  | 5.71  | 3300.41 |



|          |          |      |      |          |          |      |        |
|----------|----------|------|------|----------|----------|------|--------|
| 369.2276 | negative | 2.06 | 2.16 | 1.10E-04 | 3.02E-03 | 4.13 | 13.10  |
| 375.2176 | negative | 1.37 | 1.34 | 1.12E-03 | 6.14E-03 | 3.19 | 33.43  |
| 381.1915 | negative | 2.36 | 1.40 | 7.94E-06 | 2.63E-02 | 5.73 | ∞      |
| 383.2071 | negative | 2.27 | 1.59 | 9.58E-06 | 1.80E-02 | 6.32 | ∞      |
| 385.2229 | negative | 1.14 | 1.05 | 1.00E-03 | 4.99E-03 | 3.85 | ∞      |
| 700.5280 | negative | 1.38 | 1.50 | 6.65E-06 | 1.61E-08 | 0.05 | 0.06   |
| 722.5127 | negative | 2.33 | 2.78 | 1.29E-04 | 5.15E-05 | 0.19 | 0.22   |
| 742.5390 | negative | 2.05 | 2.65 | 6.71E-04 | 6.40E-06 | 0.20 | 0.06   |
| 750.5436 | negative | 1.79 | 2.09 | 7.84E-05 | 2.49E-04 | 0.18 | 0.22   |
| 766.5386 | negative | 2.20 | 2.69 | 5.10E-06 | 1.87E-05 | 0.08 | 0.14   |
| 104.0341 | negative | 2.00 | 1.92 | 2.59E-06 | 5.03E-12 | 0.07 | 0.11   |
| 111.0182 | negative | 2.33 | 1.61 | 1.27E-05 | 6.69E-06 | 0.26 | 0.36   |
| 131.0446 | negative | 1.19 | 1.35 | 2.00E-04 | 9.20E-08 | 0.37 | 0.01   |
| 140.0101 | negative | 3.47 | 4.50 | 5.22E-08 | 3.68E-10 | 0.04 | 0.06   |
| 154.0605 | negative | 1.89 | 1.82 | 7.00E-07 | 1.20E-09 | 0.04 | 0.06   |
| 221.1174 | negative | 1.64 | 1.25 | 2.76E-06 | 1.53E-03 | 7.86 | 209.67 |
| 325.2016 | negative | 2.24 | 1.66 | 1.83E-04 | 1.33E-03 | 3.59 | 151.98 |
| 361.2384 | negative | 1.12 | 1.54 | 3.52E-03 | 1.05E-03 | 2.90 | 89.81  |

#### Differential variables between FA and fvPTC

| m/z      | scan mode | VIP* 1 | VIP* 2 | p value 1 | p value 2 | FC* 1 | FC* 2 |
|----------|-----------|--------|--------|-----------|-----------|-------|-------|
| 137.0710 | positive  | 1.76   | 3.63   | 9.32E-03  | 2.02E-07  | 0.30  | 0.09  |
| 142.9479 | positive  | 2.04   | 1.33   | 2.44E-03  | 5.39E-03  | 2.28  | 3.02  |
| 199.1440 | positive  | 2.45   | 1.83   | 1.32E-03  | 1.85E-05  | 2.42  | 8.81  |
| 203.1500 | positive  | 1.34   | 2.69   | 2.98E-02  | 1.24E-05  | 0.20  | 0.12  |
| 154.9265 | negative  | 2.72   | 2.46   | 1.12E-02  | 7.78E-03  | 1.99  | 3.10  |
| 164.9552 | negative  | 2.26   | 2.61   | 3.55E-04  | 9.66E-03  | 2.45  | 1.99  |
| 277.0733 | negative  | 2.12   | 1.88   | 1.22E-04  | 1.75E-02  | 2.84  | 4.72  |
| 307.0840 | negative  | 3.24   | 1.53   | 2.95E-04  | 1.45E-02  | 6.39  | 3.99  |

#### Differential variables between cvPTC and fvPTC

| m/z      | scan mode | VIP* 1 | VIP* 2 | p value 1 | p value 2 | FC* 1 | FC* 2 |
|----------|-----------|--------|--------|-----------|-----------|-------|-------|
| 232.1543 | positive  | 3.59   | 2.44   | 2.57E-04  | 1.12E-03  | 4.66  | 3.58  |
| 175.0233 | negative  | 19.05  | 7.77   | 5.58E-04  | 1.50E-02  | 2.85  | 1.97  |

\*FC (fold change) = FA / cvPTC; FA / fvPTC; cvPTC / fvPTC      VIP: Variable importance  
1: Discovery set      2: Validation set



**Table S7. Reproducible differential variables for benign (FA) and malignant thyroid tumor (FTC)**

| m/z      | scan mode | VIP*  | p value  | FC*     | m/z      | scan mode | VIP* | p value  | FC*   |
|----------|-----------|-------|----------|---------|----------|-----------|------|----------|-------|
| 112.0872 | positive  | 1.32  | 2.64E-02 | 0.35    | 223.0976 | negative  | 2.12 | 8.19E-04 | 8.30  |
| 113.1077 | positive  | 2.11  | 2.21E-04 | 2832.28 | 225.1134 | negative  | 1.76 | 1.03E-03 | 2.86  |
| 129.1024 | positive  | 2.45  | 1.12E-03 | 14.61   | 259.0240 | negative  | 1.72 | 2.92E-02 | 1.94  |
| 141.1134 | positive  | 8.06  | 1.83E-02 | 0.23    | 272.0625 | negative  | 1.99 | 7.47E-03 | 11.63 |
| 143.1180 | positive  | 2.68  | 8.28E-04 | 5.41    | 296.8611 | negative  | 1.35 | 1.52E-02 | 3.06  |
| 158.9220 | positive  | 1.12  | 6.53E-04 | 2.51    | 301.8992 | negative  | 1.57 | 4.32E-03 | 5.67  |
| 159.0277 | positive  | 2.11  | 3.35E-03 | 2.50    | 302.0543 | negative  | 2.01 | 2.62E-02 | 2.12  |
| 167.1180 | positive  | 1.23  | 4.67E-04 | 10.97   | 307.0853 | negative  | 2.21 | 1.78E-02 | 2.86  |
| 169.1336 | positive  | 1.87  | 3.52E-04 | 9.12    | 320.0635 | negative  | 2.44 | 5.90E-04 | 4.33  |
| 177.0884 | positive  | 1.44  | 1.61E-03 | 0.39    | 323.8758 | negative  | 2.20 | 8.95E-04 | 5.61  |
| 180.9029 | positive  | 2.11  | 5.77E-04 | 3.09    | 330.0776 | negative  | 3.13 | 2.31E-02 | 3.27  |
| 184.0945 | positive  | 2.57  | 4.30E-03 | 2.57    | 331.1926 | negative  | 1.27 | 1.69E-02 | 2.04  |
| 187.1443 | positive  | 1.32  | 4.06E-04 | 7.44    | 333.2083 | negative  | 1.78 | 1.45E-03 | 2.37  |
| 196.8772 | positive  | 1.05  | 3.56E-03 | 2.78    | 335.2238 | negative  | 2.29 | 2.06E-02 | 1.79  |
| 199.1442 | positive  | 3.41  | 1.04E-04 | 3.65    | 343.0273 | negative  | 1.16 | 7.19E-03 | 7.21  |
| 211.1441 | positive  | 1.59  | 1.36E-04 | 6.64    | 347.2007 | negative  | 1.66 | 1.28E-02 | 4.64  |
| 217.1547 | positive  | 1.48  | 8.39E-04 | 2.87    | 349.2035 | negative  | 3.43 | 1.41E-04 | 2.67  |
| 225.0346 | positive  | 1.07  | 1.61E-03 | 2.95    | 353.2340 | negative  | 2.26 | 9.01E-04 | 2.48  |
| 226.1052 | positive  | 1.66  | 2.07E-03 | 3.59    | 359.0972 | negative  | 1.48 | 3.40E-04 | 8.37  |
| 229.1549 | positive  | 2.25  | 5.51E-03 | 3.72    | 367.2138 | negative  | 3.81 | 3.89E-04 | 3.18  |
| 235.1804 | positive  | 14.82 | 1.01E-05 | 0.20    | 369.2294 | negative  | 2.04 | 1.34E-03 | 2.90  |
| 237.1869 | positive  | 2.87  | 5.05E-03 | 0.45    | 374.8276 | negative  | 1.05 | 2.80E-03 | 14.17 |
| 247.1293 | positive  | 2.01  | 4.50E-03 | 3.09    | 381.1938 | negative  | 2.71 | 2.39E-04 | 3.91  |
| 257.1623 | positive  | 5.09  | 6.51E-05 | 0.20    | 383.2089 | negative  | 2.26 | 1.28E-03 | 3.19  |
| 265.1910 | positive  | 1.02  | 2.31E-03 | 0.29    | 385.1802 | negative  | 1.36 | 5.20E-03 | 12.88 |
| 268.1037 | positive  | 1.23  | 1.42E-04 | 5.84    | 385.2246 | negative  | 1.22 | 4.07E-03 | 3.14  |
| 277.1047 | positive  | 2.40  | 2.38E-02 | 1.56    | 387.1958 | negative  | 1.70 | 8.20E-03 | 5.72  |
| 280.0919 | positive  | 1.97  | 9.42E-04 | 1.92    | 389.1080 | negative  | 1.28 | 2.09E-03 | 3.39  |
| 321.1308 | positive  | 2.04  | 9.99E-03 | 1.92    | 393.0744 | negative  | 1.63 | 6.30E-03 | ∞     |
| 333.1820 | positive  | 1.01  | 1.15E-02 | 2.46    | 395.2457 | negative  | 1.41 | 2.71E-04 | 5.43  |
| 391.1879 | positive  | 1.15  | 1.73E-03 | 3.19    | 397.1885 | negative  | 1.28 | 8.60E-04 | 6.54  |
| 391.2565 | positive  | 2.02  | 7.53E-03 | 0.21    | 399.2038 | negative  | 1.52 | 2.47E-02 | 2.65  |
| 407.1828 | positive  | 1.40  | 1.09E-04 | 4.21    | 403.1899 | negative  | 1.19 | 1.77E-02 | 3.98  |
| 463.3027 | positive  | 1.20  | 2.58E-02 | 0.37    | 409.2253 | negative  | 1.47 | 1.31E-04 | 4.89  |
| 491.3353 | positive  | 1.25  | 5.31E-04 | 0.04    | 412.1995 | negative  | 3.36 | 5.24E-04 | 12.72 |
| 134.0451 | negative  | 1.11  | 4.04E-03 | 2.62    | 414.2152 | negative  | 3.09 | 8.48E-04 | 17.24 |
| 154.9240 | negative  | 2.73  | 7.44E-03 | 2.62    | 416.2309 | negative  | 1.31 | 8.20E-03 | 39.71 |
| 159.9644 | negative  | 1.92  | 4.72E-03 | 6.33    | 428.1942 | negative  | 2.23 | 2.24E-03 | 16.14 |
| 189.1127 | negative  | 2.30  | 4.50E-04 | 5.91    | 430.2097 | negative  | 3.05 | 2.00E-03 | 11.42 |
| 191.0194 | negative  | 11.84 | 2.78E-02 | 3.23    | 432.2257 | negative  | 1.49 | 6.63E-03 | 30.97 |
| 210.9629 | negative  | 1.07  | 4.38E-02 | 2.81    | 444.1893 | negative  | 2.48 | 1.17E-03 | 11.67 |
| 217.1070 | negative  | 2.32  | 9.65E-03 | 3.16    | 446.2050 | negative  | 2.25 | 3.64E-03 | 9.26  |
| 221.1183 | negative  | 1.09  | 3.61E-03 | 3.00    |          |           |      |          |       |

\*FC (fold change) = FA / FTC VIP: Variable importance

**Table S8 Identified biomarkers for diagnosis between benign (FA) and malignant thyroid tumor (cvPTC–fvPTC)**

| <b>FA and cvPTC</b> |                                            |             |                     |                                                               |           |                                                                     |                                           |
|---------------------|--------------------------------------------|-------------|---------------------|---------------------------------------------------------------|-----------|---------------------------------------------------------------------|-------------------------------------------|
| <i>m/z</i>          | Identification                             | HMDB ID     | Adduct Ion          | Elemental Composition                                         | Delta ppm | Product Ions                                                        | Sub Class                                 |
| 114.0665            | Creatinine                                 | HMDB0000562 | [M+H] <sup>+</sup>  | C <sub>4</sub> H <sub>7</sub> N <sub>3</sub> O                | 2.731     | 86.0741, 72.0474                                                    | Amino acids derivatives                   |
| 118.0866            | Betaine*                                   | HMDB0000043 | [M+H] <sup>+</sup>  | C <sub>5</sub> H <sub>11</sub> NO <sub>2</sub>                | 2.920     | 59.0739, 58.0660                                                    | Amino acids derivatives                   |
| 137.0458            | Hypoxanthine*                              | HMDB0000157 | [M+H] <sup>+</sup>  | C <sub>5</sub> H <sub>4</sub> N <sub>4</sub> O                | 0.092     | 119.0351, 110.0348, 94.0403, 82.0406                                | Purines derivatives                       |
| 137.0711            | N-Methylnicotinamide                       | HMDB0003152 | [M+H] <sup>+</sup>  | C <sub>7</sub> H <sub>8</sub> N <sub>2</sub> O                | 1.171     | 120.0440, 110.0600, 56.0500                                         | Nicotinamides<br>(Pyridines derivatives)  |
| 141.1134            | Methenamine                                | HMDB0029598 | [M+H] <sup>+</sup>  | C <sub>6</sub> H <sub>12</sub> N <sub>4</sub>                 | -0.517    | 112.0865, 71.0606, 58.0658                                          | Polyamine                                 |
| 162.1123            | Carnitine*                                 | HMDB0000062 | [M+H] <sup>+</sup>  | C <sub>7</sub> H <sub>15</sub> NO <sub>3</sub>                | -1.048    | 103.0394, 102.0920, 85.0291, 60.0819                                | Carnitines                                |
| 169.0583            | Glutamine*                                 | HMDB0000641 | [M+Na] <sup>+</sup> | C <sub>5</sub> H <sub>10</sub> N <sub>2</sub> O <sub>3</sub>  | -0.375    | 84.0452, 130.0503                                                   | Amino acids                               |
| 175.1190            | Arginine                                   | HMDB0000517 | [M+H] <sup>+</sup>  | C <sub>6</sub> H <sub>14</sub> N <sub>4</sub> O <sub>2</sub>  | 0.273     | 158.0927, 130.0983, 116.0705, 70.0656, 60.0563                      | Amino acids                               |
| 203.1503            | Dimethylarginine*                          | HMDB0001539 | [M+H] <sup>+</sup>  | C <sub>8</sub> H <sub>18</sub> N <sub>4</sub> O <sub>2</sub>  | 0.234     | 158.1285, 116.0708, 88.0875, 70.0657                                | Amino acids                               |
| 204.1230            | Acetylcarnitine*                           | HMDB0000201 | [M+H] <sup>+</sup>  | C <sub>9</sub> H <sub>17</sub> NO <sub>4</sub>                | -0.169    | 145.0488, 144.1013, 85.0275, 60.0815                                | Carnitines                                |
| 232.1546            | Butyryl-L-carnitine*                       | HMDB0002013 | [M+H] <sup>+</sup>  | C <sub>11</sub> H <sub>21</sub> NO <sub>4</sub>               | 1.143     | 173.0821, 85.0295, 60.0818                                          | Carnitines                                |
| 247.1289            | Glutamylvaline                             | HMDB0028832 | [M+H] <sup>+</sup>  | C <sub>10</sub> H <sub>18</sub> N <sub>2</sub> O <sub>5</sub> | 1.828     | 229.1185, 211.1077, 130.0503, 112.0400, 102.0556, 85.0292, 84.0452, | Dipeptides                                |
| 124.0063            | Taurine*                                   | HMDB0000251 | [M-H] <sup>-</sup>  | C <sub>2</sub> H <sub>7</sub> NO <sub>3</sub> S               | -8.766    | 106.9814, 94.9808, 79.9570, 64.9709                                 | Organic acids                             |
| 104.0341            | Serine                                     | HMDB0000187 | [M-H] <sup>-</sup>  | C <sub>3</sub> H <sub>7</sub> NO <sub>3</sub>                 | -11.692   | 74.0250, 58.0304                                                    | Amino acids                               |
| 111.0189            | Uracil*                                    | HMDB0000300 | [M-H] <sup>-</sup>  | C <sub>4</sub> H <sub>4</sub> N <sub>2</sub> O <sub>2</sub>   | -9.914    | 67.0172                                                             | Pyrimidines and<br>pyrimidine Derivatives |
| 131.0452            | Asparagine*                                | HMDB0000168 | [M-H] <sup>-</sup>  | C <sub>4</sub> H <sub>8</sub> N <sub>2</sub> O <sub>3</sub>   | -6.222    | 131.0454, 114.0193, 113.0341, 70.0304                               | Amino acids                               |
| 135.0305            | Hypoxanthine*                              | HMDB0000157 | [M-H] <sup>-</sup>  | C <sub>5</sub> H <sub>4</sub> N <sub>4</sub> O                | -5.436    | 106.0274, 92.0250, 64.0145                                          | Purines derivatives                       |
| 140.0110            | O-Phosphorylethanolamine*                  | HMDB0000224 | [M-H] <sup>-</sup>  | C <sub>2</sub> H <sub>8</sub> NO <sub>4</sub> P               | -5.839    | 78.9595                                                             | Glycerophospholipids                      |
| 145.0610            | Glutamine*                                 | HMDB0000641 | [M-H] <sup>-</sup>  | C <sub>5</sub> H <sub>10</sub> N <sub>2</sub> O <sub>3</sub>  | -5.966    | 127.0501, 109.0401, 84.0449, 74.0254                                | Amino acids                               |
| 146.0451            | Glutamate*                                 | HMDB0000148 | [M-H] <sup>-</sup>  | C <sub>5</sub> H <sub>9</sub> NO <sub>4</sub>                 | -5.348    | 102.0559, 128.0347, 85.0267                                         | Amino acids                               |
| 154.0614            | Histidine*                                 | HMDB0000177 | [M-H] <sup>-</sup>  | C <sub>6</sub> H <sub>9</sub> N <sub>3</sub> O <sub>2</sub>   | -5.192    | 137.0358, 110.0712, 93.0457, 81.0463                                | Amino acids                               |
| 164.0709            | Phenylalanine*                             | HMDB0000159 | [M-H] <sup>-</sup>  | C <sub>9</sub> H <sub>11</sub> NO <sub>2</sub>                | -4.888    | 147.0445, 103.0549, 72.0094                                         | Amino acids                               |
| 174.0401            | N-acetylaspartate*                         | HMDB0000812 | [M-H] <sup>-</sup>  | C <sub>6</sub> H <sub>9</sub> NO <sub>5</sub>                 | -3.997    | 130.0491, 114.0179, 88.0397, 58.0297,                               | Amino acids derivatives                   |
| 175.0242            | Ascorbic acid*                             | HMDB0000044 | [M-H] <sup>-</sup>  | C <sub>6</sub> H <sub>8</sub> O <sub>6</sub>                  | -3.492    | 115.0020, 87.0082, 71.0135, 59.0133                                 | Vitamin C                                 |
| 293.2119            | 9-OxoODE; 9/13-HOTE;<br>9(10)/15(16)-EpODE | \           | [M-H] <sup>-</sup>  | C <sub>18</sub> H <sub>30</sub> O <sub>3</sub>                | -1.085    | 249.2243, 185.1158, 125.0969, 59.0137, 57.0349                      | Long-chain fatty acids                    |
| 295.2272            | 9/13-HODE; 9,10-Epoxyoctadecenoic acid;    | \           | [M-H] <sup>-</sup>  | C <sub>18</sub> H <sub>32</sub> O <sub>3</sub>                | -2.263    | 277.2176, 195.1403, 171.1041, 113.0946, 59.0137                     | Long-chain fatty acids                    |

|          |                                     |             |                    |                                                   |        |                                                                     |                        |
|----------|-------------------------------------|-------------|--------------------|---------------------------------------------------|--------|---------------------------------------------------------------------|------------------------|
|          | 13S-hydroxyoctadecadienoic acid     |             |                    |                                                   |        |                                                                     |                        |
| 309.2067 | 12(13)Ep-9-KODE                     | HMDB0013623 | [M-H] <sup>-</sup> | C <sub>18</sub> H <sub>30</sub> O <sub>4</sub>    | -1.399 | 295.1965, 209.1183, 193.1234, 171.1026, 137.0971                    | Long-chain fatty acids |
| 311.2224 | 9-HPODE                             | HMDB0006940 | [M-H] <sup>-</sup> | C <sub>18</sub> H <sub>32</sub> O <sub>4</sub>    | -1.230 | 293.2122, 211.1352, 197.1202, 185.1193, 183.0122, 171.1031          | Long-chain fatty acids |
| 317.2117 | one of the eicosanoid 1             | \           | [M-H] <sup>-</sup> | C <sub>20</sub> H <sub>30</sub> O <sub>3</sub>    | -1.633 | 273.2230, 179.1074, 147.1163, 139.1113, 115.0385, 113.0956          | Long-chain fatty acids |
| 329.2331 | 9,10,13-TriHOME                     | HMDB0004710 | [M-H] <sup>-</sup> | C <sub>18</sub> H <sub>34</sub> O <sub>5</sub>    | -0.751 | 229.1445, 211.1339, 171.1026, 139.1128, 127.1120, 99.0815           | Long-chain fatty acids |
| 333.2083 | one of the eicosanoid 2             | \           | [M-H] <sup>-</sup> | C <sub>20</sub> H <sub>30</sub> O <sub>4</sub>    | 3.503  | 317.2119, 209.1174, 193.1227, 173.1326, 139.1116, 59.0120           | Long-chain fatty acids |
| 353.2327 | one of the eicosanoid 3             | \           | [M-H] <sup>-</sup> | C <sub>20</sub> H <sub>34</sub> O <sub>5</sub>    | -1.833 | 317.2122, 167.1077, 127.0764,                                       | Long-chain fatty acids |
| 367.2121 | one of the eicosanoid 4             | \           | [M-H] <sup>-</sup> | C <sub>20</sub> H <sub>32</sub> O <sub>6</sub>    | -1.394 | 305.2122, 99.0452, 59.0139                                          | Long-chain fatty acids |
| 381.1933 | 12-Oxo-20-trihydroxy-leukotriene B4 | HMDB0012553 | [M-H] <sup>-</sup> | C <sub>20</sub> H <sub>30</sub> O <sub>7</sub>    | 3.734  | 319.1950, 301.1796, 235.0998, 205.0859, 151.1115, 123.0803, 59.0121 | Long-chain fatty acids |
| 383.2089 | 20-Trihydroxy-leukotriene-B4        | HMDB12643   | [M-H] <sup>-</sup> | C <sub>20</sub> H <sub>32</sub> O <sub>7</sub>    | 3.584  | 177.0909, 155.0701, 115.0384, 99.0434, 59.0120                      | Long-chain fatty acids |
| 722.5127 | PE(36: 4)*                          | HMDB0009150 | [M-H] <sup>-</sup> | C <sub>41</sub> H <sub>74</sub> NO <sub>7</sub> P | -0.434 | 303.2329, 259.2439                                                  | Glycerophospholipids   |
| 742.5390 | PE(36: 2)                           | HMDB0008843 | [M-H] <sup>-</sup> | C <sub>41</sub> H <sub>78</sub> NO <sub>8</sub> P | -0.307 | 281.2480, 140.0101                                                  | Glycerophospholipids   |
| 750.5436 | PE(P-38: 4)                         | HMDB0005779 | [M-H] <sup>-</sup> | C <sub>43</sub> H <sub>78</sub> NO <sub>7</sub> P | -0.951 | 303.2329                                                            | Glycerophospholipids   |
| 766.5386 | PE(38: 4)*                          | HMDB0009583 | [M-H] <sup>-</sup> | C <sub>43</sub> H <sub>78</sub> NO <sub>8</sub> P | -0.819 | 303.2329, 281.2480                                                  | Glycerophospholipids   |

#### FA and fvPTC

| <i>m/z</i> | Identification       | HMDB ID     | Adduct Ion         | Elemental Composition                                        | Delta ppm | Product Ions                         | Sub Class                             |
|------------|----------------------|-------------|--------------------|--------------------------------------------------------------|-----------|--------------------------------------|---------------------------------------|
| 137.0710   | N-Methylnicotinamide | HMDB0003152 | [M+H] <sup>+</sup> | C <sub>7</sub> H <sub>8</sub> N <sub>2</sub> O               | 0.442     | 120.0440, 110.0600, 56.0500          | Nicotinamides (pyridines derivatives) |
| 203.1500   | Dimethylarginine*    | HMDB0001539 | [M+H] <sup>+</sup> | C <sub>8</sub> H <sub>18</sub> N <sub>4</sub> O <sub>2</sub> | -1.242    | 158.1285, 116.0708, 88.0875, 70.0657 | Amino acids                           |

#### cvPTC and fvPTC

| <i>m/z</i> | Identification       | HMDB ID     | Adduct Ion         | Elemental Composition                           | Delta ppm | Product Ions                        | Sub Class  |
|------------|----------------------|-------------|--------------------|-------------------------------------------------|-----------|-------------------------------------|------------|
| 232.1543   | Butyryl-L-carnitine* | HMDB0002013 | [M+H] <sup>+</sup> | C <sub>11</sub> H <sub>21</sub> NO <sub>4</sub> | -0.149    | 173.0821, 85.0295, 60.0818          | Carnitines |
| 175.0242   | Ascorbic acid*       | HMDB0000044 | [M-H] <sup>-</sup> | C <sub>6</sub> H <sub>8</sub> O <sub>6</sub>    | -3.492    | 115.0020, 87.0082, 71.0135, 59.0133 | Vitamin C  |

\* Metabolites have been confirmed using standard compounds.

**Table S9 Identified biomarkers for diagnosis between follicular adenoma (FA) and follicular thyroid cancer (FTC)**

| <i>m/z</i> | Identification                                   | HMDB ID       | Adduct Ion         | Elemental Composition                                           | Delta ppm | Product Ions                                                                  | Sub Class                |
|------------|--------------------------------------------------|---------------|--------------------|-----------------------------------------------------------------|-----------|-------------------------------------------------------------------------------|--------------------------|
| 112.0872   | Histamine*                                       | HMDB0000870   | [M+H] <sup>+</sup> | C <sub>5</sub> H <sub>9</sub> N <sub>3</sub>                    | 2.463     | 95.0612, 83.0609, 68.0515                                                     | Amino acids derivatives  |
| 217.1547   | Valyl-valine                                     | HMDB0029140   | [M+H] <sup>+</sup> | C <sub>10</sub> H <sub>20</sub> N <sub>2</sub> O <sub>3</sub>   | 0.143     | 200.1289, 171.1490, 118.0860, 100.0760                                        | Dipeptides               |
| 229.1549   | (Iso)leucylproline                               | HMDB0011175/4 | [M+H] <sup>+</sup> | C <sub>11</sub> H <sub>20</sub> N <sub>2</sub> O <sub>3</sub>   | 1.008     | 211.1441, 114.0919, 86.0970                                                   | Dipeptides               |
| 247.1293   | Glutamylvaline                                   | HMDB0028832   | [M+H] <sup>+</sup> | C <sub>10</sub> H <sub>18</sub> N <sub>2</sub> O <sub>5</sub>   | 1.828     | 229.1185, 211.1077, 130.0503, 112.0400, 102.0556, 85.0292, 84.0452, 70.0660   | Dipeptides               |
| 268.1037   | Adenosine*                                       | HMDB0000050   | [M+H] <sup>+</sup> | C <sub>10</sub> H <sub>13</sub> N <sub>5</sub> O <sub>4</sub>   | -1.232    | 136.0622, 119.0358                                                            | Purine nucleosides       |
| 277.1044   | Glutamyl-glutamic acid                           | HMDB0028818   | [M+H] <sup>+</sup> | C <sub>10</sub> H <sub>16</sub> N <sub>2</sub> O <sub>7</sub>   | 4.954     | 260.0771, 214.0718, 148.0610, 130.0505, 102.0557, 84.0444                     | Amino acids              |
| 134.0463   | Adenine*                                         | HMDB0000034   | [M-H] <sup>-</sup> | C <sub>5</sub> H <sub>5</sub> N <sub>5</sub>                    | -6.852    | 107.0346, 92.0237, 80.0237, 65.0127                                           | Purine derivatives       |
| 189.1127   | 8,9-Dihydroxynonanoic acid                       | HMDB0000666   | [M-H] <sup>-</sup> | C <sub>9</sub> H <sub>17</sub> O <sub>4</sub>                   | -2.815    | 129.0902, 73.0275, 59.0120                                                    | Medium-chain fatty acids |
| 191.0194   | Citric acid*                                     | HMDB0000094   | [M-H] <sup>-</sup> | C <sub>6</sub> H <sub>8</sub> O <sub>7</sub>                    | -1.706    | 173.0075, 111.0072, 87.0070, 85.0296                                          | Organic acids            |
| 217.1081   | 2-Hydroxydecanedioic acid /3-Hydroxysebacic acid | HMDB00350/424 | [M-H] <sup>-</sup> | C <sub>10</sub> H <sub>18</sub> O <sub>5</sub>                  | -0.216    | 181.0875, 157.0974                                                            | Medium-chain fatty acids |
| 225.1134   | 3,4-Methylenesebacic acid                        | HMDB0059729   | [M-H] <sup>-</sup> | C <sub>12</sub> H <sub>18</sub> O <sub>4</sub>                  | 0.745     | 207.1013, 59.0118                                                             | Medium-chain fatty acids |
| 259.0230   | Glucose 1-phosphate                              | HMDB0001586   | [M-H] <sup>-</sup> | C <sub>6</sub> H <sub>13</sub> O <sub>9</sub> P                 | 2.156     | 259.0221, 241.0103, 138.9786, 96.9694, 78.9573                                | Monosaccharide           |
| 320.0639   | Deoxy-5-methylcytidylate                         |               | [M-H] <sup>-</sup> | C <sub>10</sub> H <sub>16</sub> N <sub>3</sub> O <sub>7</sub> P | -4.404    | 302.0517, 284.0412, 240.0509, 216.0506, 196.0603, 128.0338, 110.0230, 59.0120 | Pyrimidine derivatives   |
| 333.2083   | one of the eicosanoid 2                          |               | [M-H] <sup>-</sup> | C <sub>20</sub> H <sub>30</sub> O <sub>4</sub>                  | 3.503     | 317.2119, 273.2230, 235.1354, 209.1174, 193.1227, 173.1326, 139.1116, 59.0120 | Long-chain fatty acids   |
| 349.2035   | one of the eicosanoid 5                          |               | [M-H] <sup>-</sup> | C <sub>20</sub> H <sub>30</sub> O <sub>5</sub>                  | 4.160     | 305.1771, 269.1919, 181.1225, 155.1064, 137.0957, 95.0484, 84.0199, 59.0120   | Long-chain fatty acids   |
| 353.2340   | one of the eicosanoid 3                          |               | [M-H] <sup>-</sup> | C <sub>20</sub> H <sub>34</sub> O <sub>5</sub>                  | 1.848     | 235.1340, 197.1173, 167.1065, 139.1113, 99.0797, 85.0277, 59.0120             | Long-chain fatty acids   |

|          |                                     |             |                    |                                                |       |                                                                                     |                        |
|----------|-------------------------------------|-------------|--------------------|------------------------------------------------|-------|-------------------------------------------------------------------------------------|------------------------|
| 367.2138 | one of the eicosanoid 4             |             | [M-H] <sup>-</sup> | C <sub>20</sub> H <sub>32</sub> O <sub>6</sub> | 3.235 | 305.2127, 289.1811, 245.1910,<br>235.0975, 187.0967, 157.0858,<br>109.0642, 59.0120 | Long-chain fatty acids |
| 369.2294 | one of the eicosanoid 6             |             | [M-H] <sup>-</sup> | C <sub>20</sub> H <sub>34</sub> O <sub>6</sub> | 3.082 | 195.1017, 169.0858, 157.0852, 115.0379                                              | Long-chain fatty acids |
| 381.1933 | 12-Oxo-20-trihydroxy-leukotriene B4 | HMDB0012553 | [M-H] <sup>-</sup> | C <sub>20</sub> H <sub>30</sub> O <sub>7</sub> | 3.734 | 319.1950, 301.1796, 235.0998,<br>205.0859, 151.1115, 123.0803, 59.0121              | Long-chain fatty acids |
| 383.2089 | 20-Trihydroxy-leukotriene-B4        | HMDB12643   | [M-H] <sup>-</sup> | C <sub>20</sub> H <sub>32</sub> O <sub>7</sub> | 3.584 | 177.0909, 155.0701, 115.0384, 99.0434,<br>59.0120                                   | Long-chain fatty acids |

\* Metabolites have been confirmed using standard compounds.

**Table S10 Receiver operating characteristic curves (ROC) analysis result of potential diagnostic biomarkers**

| Biomarker                  | m/z      | Mode     | Specificity | Sensitivity | AUC value | Group          |
|----------------------------|----------|----------|-------------|-------------|-----------|----------------|
| N-Methylnicotinamide       | 137.0711 | positive | 90.90%      | 76.90%      | 0.846     | FA vs PTC      |
| Unknown-1                  | 199.1440 | positive | 80.80%      | 77.30%      | 0.743     | FA vs PTC      |
| Dimethylarginine           | 203.1503 | positive | 90.90%      | 69.20%      | 0.772     | FA vs PTC      |
| Butyryl-L-carnitine        | 232.1546 | positive | 88.60%      | 69.00%      | 0.806     | FA vs cvPTC    |
|                            |          |          | 88.40%      | 71.40%      | 0.821     | cvPTC vs fvPTC |
| Glutamylvaline             | 247.1289 | positive | 93.10%      | 68.20%      | 0.857     | FA vs cvPTC    |
| Glutamine                  | 145.0610 | negative | 100.0%      | 82.80%      | 0.945     | FA vs cvPTC    |
| Histidine                  | 154.0614 | negative | 95.50%      | 89.70%      | 0.930     | FA vs cvPTC    |
| Unknown-2                  | 319.2274 | negative | 89.70%      | 81.80%      | 0.855     | FA vs cvPTC    |
| Unknown-3                  | 164.9552 | negative | 63.00%      | 78.70%      | 0.678     | FA vs fvPTC    |
|                            |          |          | 86.40%      | 93.10%      | 0.921     | FA vs cvPTC    |
| Ascorbic acid              | 175.0242 | negative | 76.70%      | 74.30%      | 0.803     | cvPTC vs fvPTC |
| 8,9-Dihydroxynonanoic acid | 189.1127 | negative | 100.0%      | 60.00%      | 0.800     | FA vs FTC      |
| Deoxy-5-methylcytidylate   | 320.0635 | negative | 100.0%      | 65.00%      | 0.835     | FA vs FTC      |
| Citric acid                | 191.0194 | negative | 76.90%      | 85.00%      | 0.831     | FA vs FTC      |

Table S11 Predictive score results of suspicious focuses in indeterminate case 'TC14' based on OPLS-DA model

|            | Positive mode |           |             |              | Negative mode |           |               |             | Computational prediction |           |               |
|------------|---------------|-----------|-------------|--------------|---------------|-----------|---------------|-------------|--------------------------|-----------|---------------|
|            | Class FA      | Class FTC | Class fvPTC | Class cvPTC  | Class FA      | Class FTC | Class fvPTC   | Class cvPTC | Class FA                 | Class FTC | Class PTC     |
| TC14-P-1-A | 0.6649        | 0.0434    | -0.3806     | <b>0.672</b> | 0.0932        | 0.1874    | <b>0.9044</b> | -0.1851     | 0.3791                   | 0.1154    | <b>0.5055</b> |
| TC14-P-1-B | 0.9989        | -0.1079   | -0.2381     | 0.3472       | 0.0050        | 0.3401    | <b>0.9813</b> | -0.3264     | <b>0.5019</b>            | 0.1161    | 0.3820        |
| TC14-P-1-C | 0.6388        | -0.0263   | -0.0867     | 0.4743       | 0.1244        | 0.2287    | <b>0.8102</b> | -0.1633     | 0.3816                   | 0.1012    | <b>0.5172</b> |
| TC14-P-1-D | 0.7153        | 0.0657    | 0.0523      | 0.1666       | -0.0048       | 0.3583    | <b>1.0920</b> | -0.4456     | 0.3553                   | 0.2120    | <b>0.4327</b> |
| TC14-P-2-E | 0.6415        | 0.0543    | -0.3364     | 0.6406       | 0.1877        | 0.2057    | <b>0.8339</b> | -0.2272     | 0.4146                   | 0.1300    | <b>0.4554</b> |
| TC14-P-2-F | 0.4871        | 0.0026    | 0.0845      | 0.4258       | 0.0534        | 0.2997    | <b>0.9848</b> | -0.3379     | 0.2703                   | 0.1511    | <b>0.5786</b> |
| TC14-P-2-G | 0.6682        | -0.1272   | 0.1554      | 0.3036       | -0.0732       | 0.1511    | <b>0.8760</b> | 0.0461      | 0.2975                   | 0.0120    | <b>0.6906</b> |
| TC14-P-2-H | 0.5665        | -0.0324   | 0.0539      | 0.4120       | 0.0271        | 0.2954    | <b>0.9917</b> | -0.3142     | 0.2968                   | 0.1315    | <b>0.5717</b> |
| TC14-P-3-I | 0.3858        | 0.1154    | -0.2716     | <b>0.770</b> | 0.1884        | 0.1281    | <b>0.8531</b> | -0.1696     | 0.2871                   | 0.1217    | <b>0.5911</b> |
| TC14-P-3-J | 0.9517        | -0.0193   | -0.3551     | 0.4227       | 0.0384        | 0.2980    | <b>0.9805</b> | -0.3169     | <b>0.4950</b>            | 0.1393    | 0.3656        |
| TC14-P-3-K | 0.7144        | -0.0585   | -0.2019     | 0.5460       | 0.2510        | 0.0871    | <b>0.8759</b> | -0.2140     | 0.4827                   | 0.0143    | <b>0.5030</b> |
| TC14-P-3-L | 0.7425        | -0.0978   | -0.0747     | 0.4299       | 0.0195        | 0.2941    | <b>0.9372</b> | -0.2508     | 0.3810                   | 0.0982    | <b>0.5208</b> |
| TC14-P-4-M | 0.6794        | -0.0551   | -0.2518     | 0.6276       | 0.0439        | 0.3247    | <b>0.8174</b> | -0.1860     | 0.3616                   | 0.1348    | <b>0.5036</b> |
| TC14-P-4-N | 0.7827        | -0.0612   | -0.1564     | 0.4349       | -0.0014       | 0.0766    | <b>1.3174</b> | -0.3926     | 0.3907                   | 0.0077    | <b>0.6016</b> |
| TC14-P-4-O | 0.4717        | 0.0225    | 0.0993      | 0.4066       | 0.0226        | 0.2677    | <b>1.0866</b> | -0.3769     | 0.2471                   | 0.1451    | <b>0.6078</b> |
| TC14-P-4-P | 0.6455        | 0.0674    | -0.1998     | 0.4869       | -0.0860       | 0.5107    | <b>0.7240</b> | -0.1486     | 0.2797                   | 0.2890    | <b>0.4313</b> |
| TC14-P-5-Q | 0.6254        | -0.0063   | -0.2107     | 0.5916       | 0.2731        | 0.2029    | <b>0.6703</b> | -0.1463     | 0.4493                   | 0.0983    | <b>0.4525</b> |
| TC14-P-5-R | 0.6977        | -0.0168   | -0.5033     | <b>0.822</b> | 0.0843        | 0.3830    | 0.6203        | -0.0876     | 0.3910                   | 0.1831    | <b>0.4259</b> |
| TC14-P-5-S | 0.4145        | 0.0519    | -0.1576     | <b>0.691</b> | -0.0184       | 0.1959    | <b>1.0911</b> | -0.2687     | 0.1981                   | 0.1239    | <b>0.6780</b> |
| TC14-P-5-T | 0.4941        | 0.0818    | -0.2091     | 0.6332       | -0.0474       | 0.2794    | <b>0.8889</b> | -0.1210     | 0.2234                   | 0.1806    | <b>0.5961</b> |
| TC14-P-6-U | 0.5164        | 0.0515    | -0.2541     | <b>0.686</b> | 0.2579        | 0.2081    | <b>0.6989</b> | -0.1649     | 0.3872                   | 0.1298    | <b>0.4830</b> |
| TC14-P-6-V | 0.7136        | -0.0052   | -0.2638     | 0.5554       | 0.0595        | 0.2844    | <b>0.9377</b> | -0.2816     | 0.3866                   | 0.1396    | <b>0.4738</b> |
| TC14-P-6-W | 0.6219        | -0.0122   | -0.1724     | 0.5627       | 0.4896        | 0.0516    | 0.4494        | 0.0094      | <b>0.5558</b>            | 0.0197    | 0.4245        |
| TC14-P-6-X | 0.5619        | 0.0268    | -0.1110     | 0.5223       | 0.0239        | 0.3337    | <b>0.8422</b> | -0.1998     | 0.2929                   | 0.1802    | <b>0.5269</b> |

**Table S12 A summary of diagnostic studies performed on thyroid tumor using mass spectrometry imaging technique <sup>[1]</sup>**

| Reference                                        | Thyroid tissue type                                                                                                                                                                       | Analytical method | Main results                                                                                                                                                                                                                                                        |
|--------------------------------------------------|-------------------------------------------------------------------------------------------------------------------------------------------------------------------------------------------|-------------------|---------------------------------------------------------------------------------------------------------------------------------------------------------------------------------------------------------------------------------------------------------------------|
| Ishikawa et al., 2012 <sup>[2]</sup>             | Papillary thyroid cancer(PTC),<br>normal thyroid tissues(N)                                                                                                                               | MALDI-MSI         | Discrimination between PTC and N<br>Potential biomarkers:<br>(i) PTC > HC: PC(34:1), PC(34:2), SM(34:1)                                                                                                                                                             |
| Martin Nipp et al., 2012 <sup>[3]</sup>          | Papillary thyroid cancer(PTC)<br>with lymph node metastasis (N1) and<br>without lymph node metastasis (N0))                                                                               | MALDI-MSI         | Discrimination between metastatic and nonmetastatic tumors<br>Potential biomarkers:<br>(i) PTC-N1 > PTC-N0: thioredoxin, S100-A10, S100-A6                                                                                                                          |
| Guo et al., 2014 <sup>[4]</sup>                  | Papillary thyroid cancer(PTC),<br>follicular thyroid cancer(FTC),<br>benign thyroid tumor<br>(thyroid adenoma, multinodular<br>goiter),<br>healthy control(HC)                            | MALDI-MSI         | Discrimination between malignant (MTC) and benign thyroid tumors<br>(BTT), as well as healthy control(HC)<br>Potential biomarkers:<br>(i) MTC, BTT vs HC: PC(34:1)<br>(ii) BTT vs MTC, HC: SM(34:1), PA(36:3)<br>(iii) MTC vs BTT, HC: PC(34:1), PA(36:3), SM(34:1) |
| Kyueng-Whan Min et al.,<br>2014 <sup>[5]</sup>   | Papillary thyroid cancer(PTC),<br>normal thyroid tissues(N)                                                                                                                               | MALDI-MSI         | Discrimination between PTC and N<br>Potential biomarkers:<br>(i) PTC > N: ribosomal protein P2                                                                                                                                                                      |
| Fabio Pagni et al.,2016 <sup>[6]</sup>           | Papillary thyroid cancer(PTC),<br>benign thyroid tumors(BTT)                                                                                                                              | MALDI-MSI         | Discrimination between PTC and BTT<br>Potential biomarkers:<br>(i) PTC > BTN: PEBP1, ROA2                                                                                                                                                                           |
| Monika Pietrowska et al.,<br>2016 <sup>[7]</sup> | Anaplastic thyroid cancer (ATC),<br>follicular thyroid cancer (FTC),<br>papillary thyroid cancer (cv/fvPTC)<br>(classic variant and follicular variant)<br>medullary thyroid cancer (MTC) | MALDI-MSI         | Discrimination between MTC and malignancies derived from thyroid<br>epithelium, ATC and differentiated cancers, MTC and ATC, FTC and<br>PTC<br>Potential biomarkers:<br>(i) FTC vs PTC: 14-3-3 isoforms, ANXA5, TUBA1B, PRX6, A1AT,<br>SELENBP1, PDip               |



|                                              |                                                                                                                                    |           |                                                                                                                                                                                                                                                                                                                                                                                                                                              |
|----------------------------------------------|------------------------------------------------------------------------------------------------------------------------------------|-----------|----------------------------------------------------------------------------------------------------------------------------------------------------------------------------------------------------------------------------------------------------------------------------------------------------------------------------------------------------------------------------------------------------------------------------------------------|
| Manuel Galli et al., 2016 <sup>[8]</sup>     | Papillary thyroid cancer(PTC), follicular adenomas (FA), hyperplastic nodules (HP)                                                 | MALDI-MSI | Discrimination between benign thyroid nodules (BTN) and malignant (PTC) lesions, hyperplastic lesions (HP) and follicular adenomas (FA)<br>Potential biomarkers:<br>(i) PTC > BTN: Fibronectin (FINC), Cytoplasmic Actin1 (ACTB1), Prelamin-A/C (LMNA), Heat Shock cognate 71KDa Protein (HSP7C), Adenylate Cyclase Isoenzyme 1 (KAD1)<br>(ii) FTC > HP: MARCS, CATB, CAND1, TR150<br>(iii) HP > FTC: THYG, PHB, ZN484, TFDP3, NID2 and AATC |
| Jialing Zhang et al.,2016 <sup>[9]</sup>     | Oncocytic thyroid tumors (Hurthle cell adenomas and carcinomas), nononcocytic thyroid tumors (PTC and FA) , normal thyroid tissues | DESI-MSI  | Discrimination between Oncocytic thyroid tumors (O), nononcocytic thyroid tumors (NO) and normal thyroid tissues (N)<br>Potential biomarkers:<br>(i) O > NO > N: cardiolipins (CLs), MLCL, ox-CL, CL+PC, CL+DG                                                                                                                                                                                                                               |
| Jialing Zhang et al.,2017 <sup>[10]</sup>    | Lymph node with metastatic papillary thyroid cancer (metastatic PTC), normal human lymph nodes(NLN)                                | DESI-MSI  | Discrimination between Lymph node with metastatic papillary thyroid cancer and normal human lymph nodes<br>Potential biomarkers:<br>(i) metastatic PTC > NLN: higher unsaturation in GP species with longer FA carbon chains<br>(ii) metastatic PTC < NLN: lower unsaturation in GP species with shorter FA carbon chains                                                                                                                    |
| Rachel J. DeHoog et al.,2019 <sup>[11]</sup> | follicular adenomas (FA), follicular thyroid cancer (FTC), Papillary thyroid cancer(PTC), normal thyroid tissues                   | DESI-MSI  | Discrimination between FA and FTC, FA and PTC<br>Potential biomarkers:<br>(i) FA vs FTC: FA (20:4), PS (36:1), PS (36:2), PG (32:1), PI (38:4), Cer (d36:1), PE (36:1), succinate, malate.<br>(ii) FA vs PTC: PS (36:2), Cer (d42:0), PE (38:4), PI (36:1), PA (36:1), CL (74:8),                                                                                                                                                            |

Supplementary Appendix  
Metabolite identification

(1) Metabolite identification of 8,9-dihydroxynonanoic acid

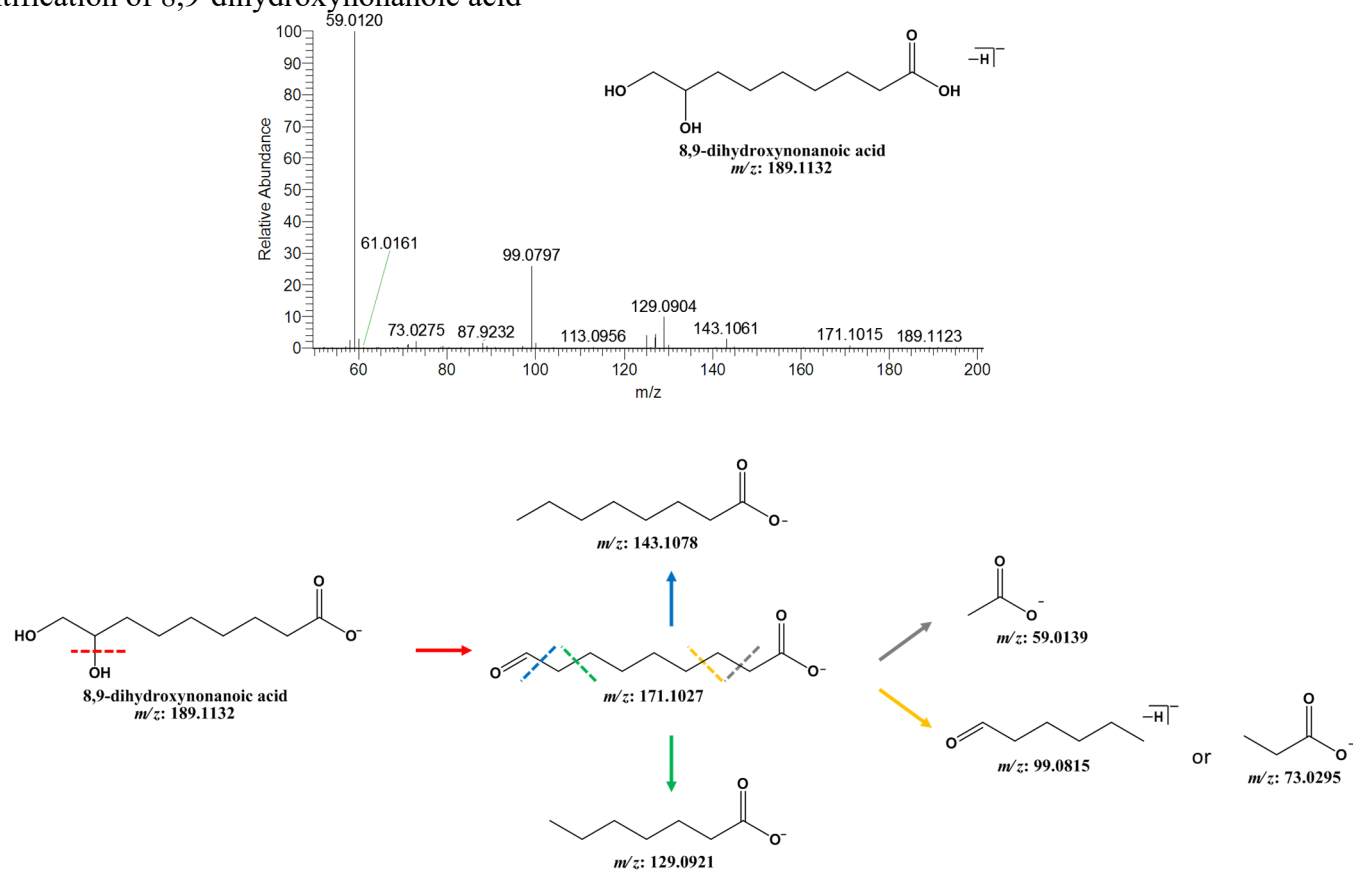

Figure S9. The MS/MS spectrum at  $m/z$  189.1123 identified as 8,9-dihydroxynonanoic acid and its potential (ESI) MS fragment pathway (below).

## (2) Metabolite identification by standards

pos-ms2-0101 #345 RT: 1.06 AV: 1 SB: 19 0.65-1.00 , 1.18-1.60 NL: 1.17E7  
F: FTMS + p ESI Full ms2 118.00@hcd33.33 [50.00-140.00]

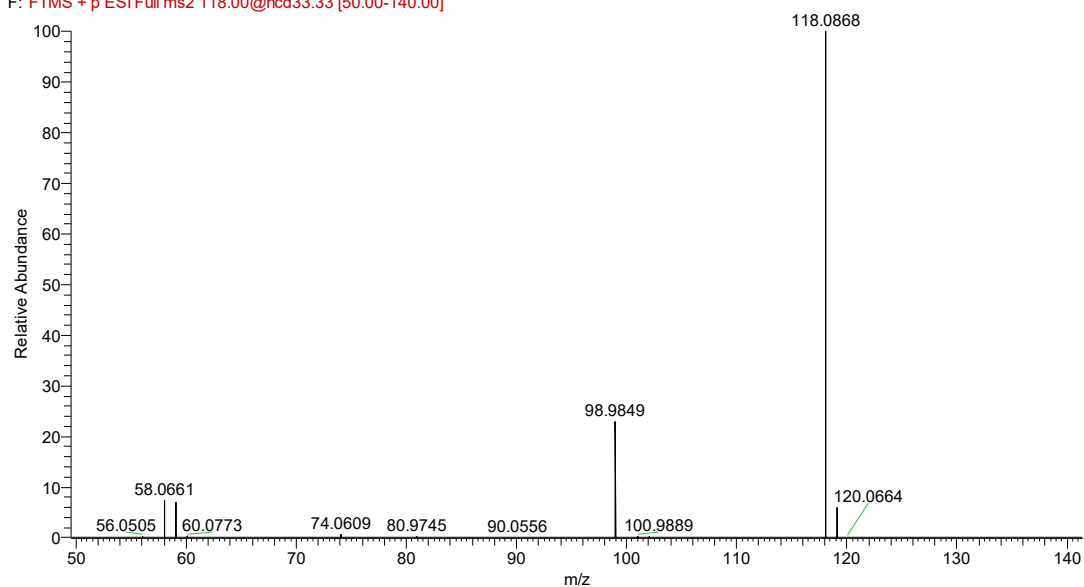

pos-1 #262 RT: 0.99 AV: 1 NL: 6.70E6  
F: FTMS + p ESI Full ms2 118.0872@hcd40.00 [50.0000-140.0000]

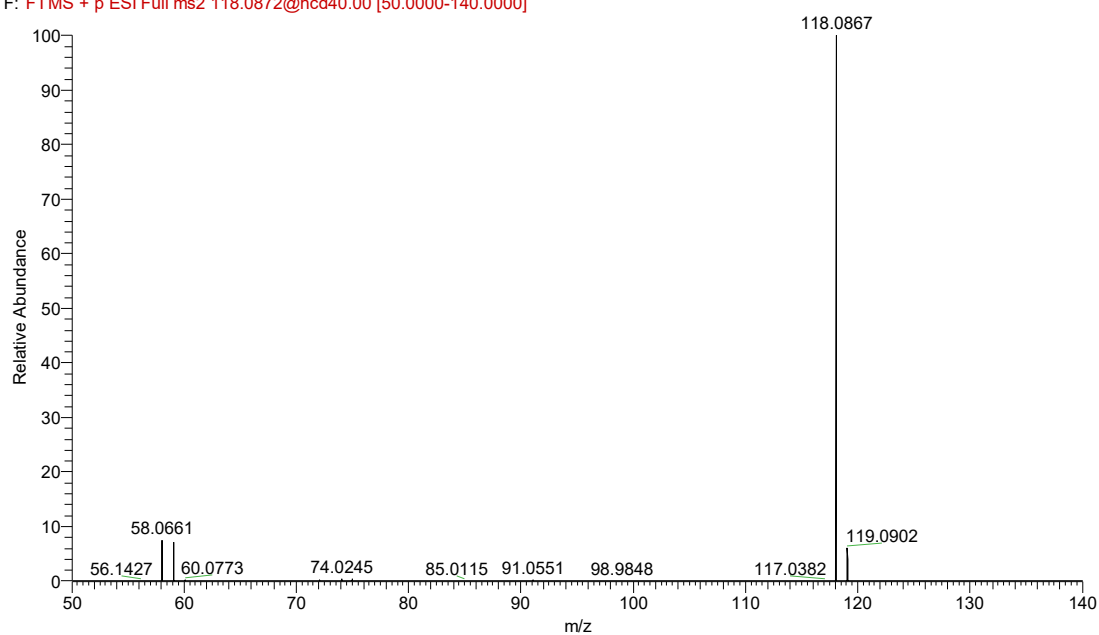

Figure S10. The MS/MS spectrum at  $m/z$  118.0868 (Table S10) identifies it as betaine when compared with the standard given in the standard betaine (below).

pos-ms2-0125 #721 RT: 2.02 AV: 1 SB: 103 1.02-1.95 , 2.32-3.28 NL: 2.98E7  
 F: FTMS + p ESI Full ms2 137.00@hcd55.00 [50.00-160.00]

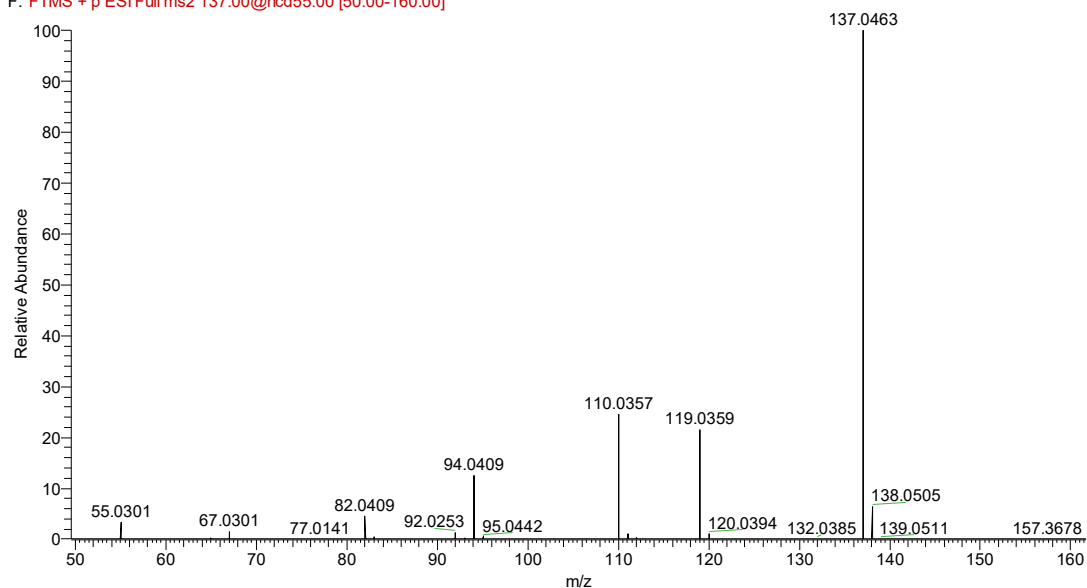

pos-1 #498 RT: 1.77 AV: 1 NL: 2.01E7  
 F: FTMS + p ESI Full ms2 137.0458@hcd80.00 [50.0000-160.0000]

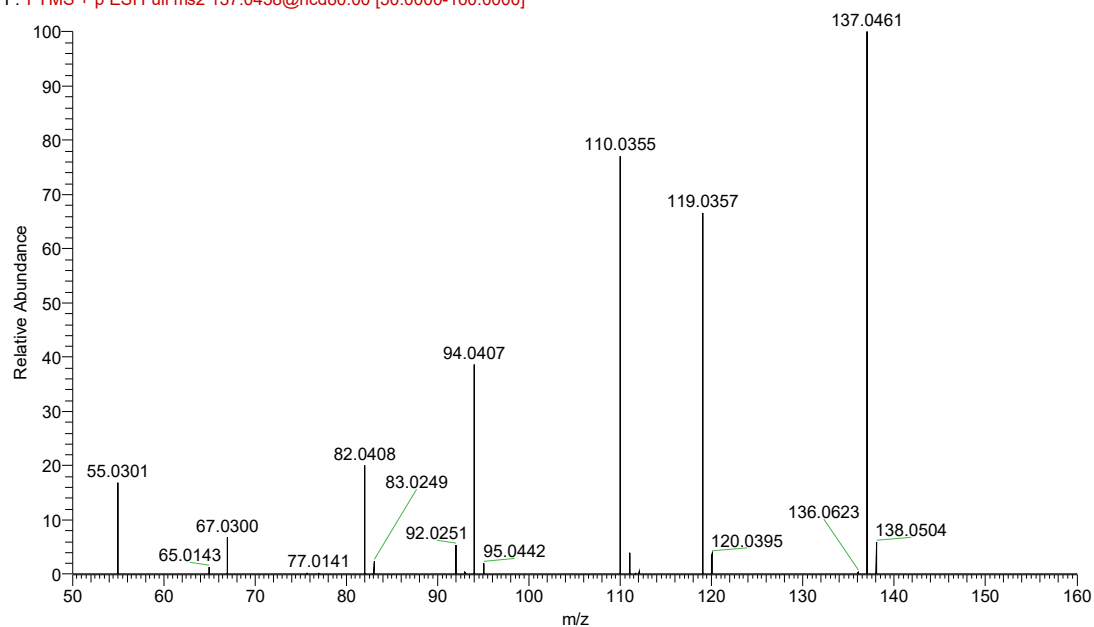

Figure S11. The MS/MS spectrum at  $m/z$  137.0463 (Table S10) identifies it as hypoxanthine when compared with the standard given in the standard hypoxanthine (below).

pos-ms2-0117 #322 RT: 1.05 AV: 1 SB: 24 0.48-1.00 , 1.12-1.65 NL: 5.37E6  
 F: FTMS + p ESI Full ms2 162.10@hcd45.00 [50.00-185.00]

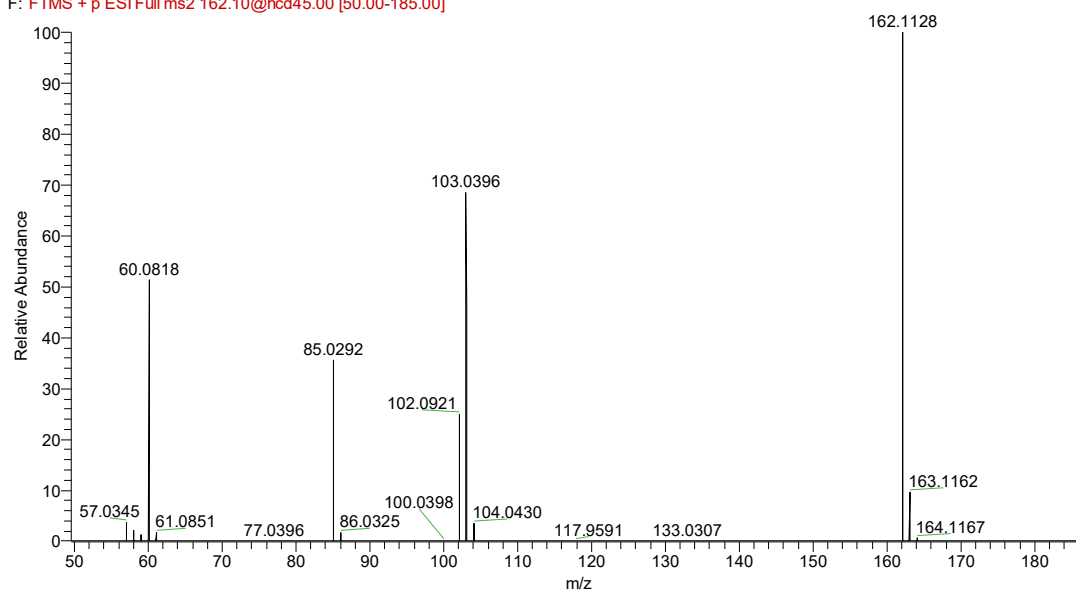

pos-1 #264 RT: 0.99 AV: 1 NL: 3.05E8  
 F: FTMS + p ESI Full ms2 162.1123@hcd65.00 [50.0000-185.0000]

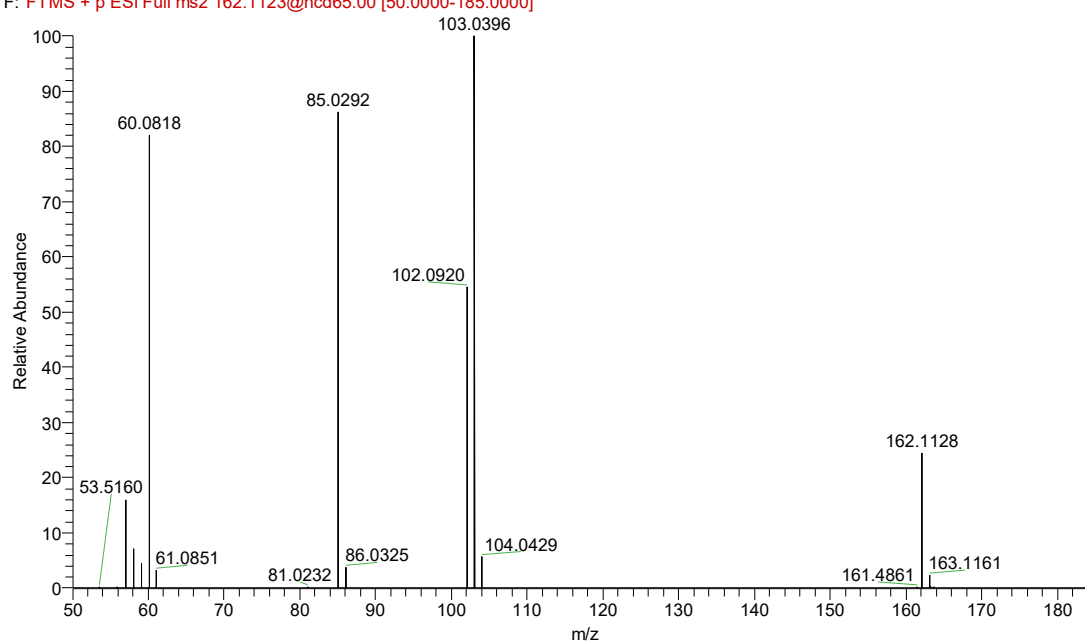

Figure S12. The MS/MS spectrum at  $m/z$  162.1128 (Table S10) identifies it as carnitine when compared with the standard given in the standard carnitine (below).

pos-ms2-0104 #327 RT: 1.00 AV: 1 SB: 19 0.49-0.97, 1.06-1.23 NL: 9.99E4  
 F: FTMS + p ESI Full ms2 169.10@hcd33.33 [50.00-190.00]

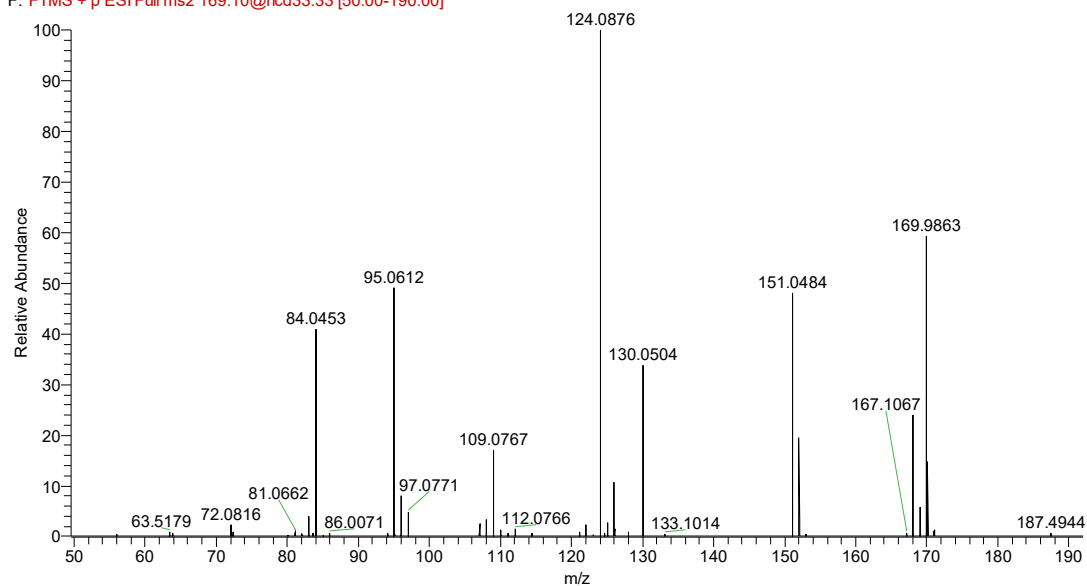

pos-3 #248 RT: 0.98 AV: 1 SB: 80 0.34-0.94, 1.06-1.52 NL: 2.18E6  
 F: FTMS + p ESI Full ms2 169.0583@hcd18.00 [50.0000-190.0000]

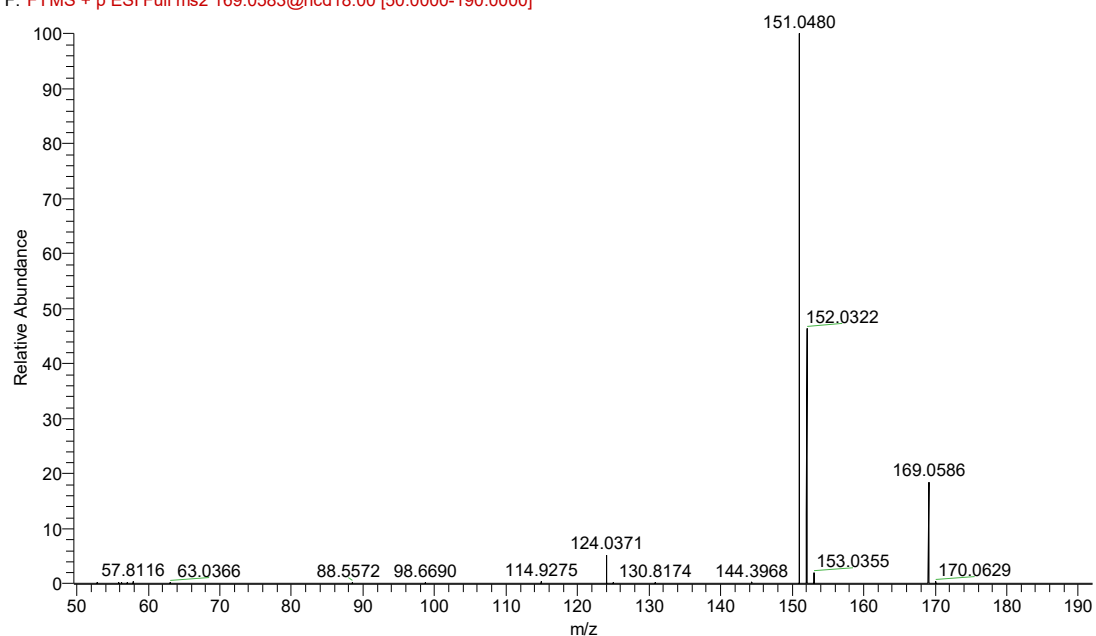

Figure S13. The MS/MS spectrum at  $m/z$  169.0583 (Table S10) identifies it as glutamine when compared with the standard given in the standard glutamine (below).

pos-ms2-0107 #360 RT: 1.12 AV: 1 SB: 53 0.60-1.08 , 1.20-1.41 NL: 1.88E5  
 F: FTMS + p ESI Full ms2 203.20@hcd33.33 [50.00-225.00]

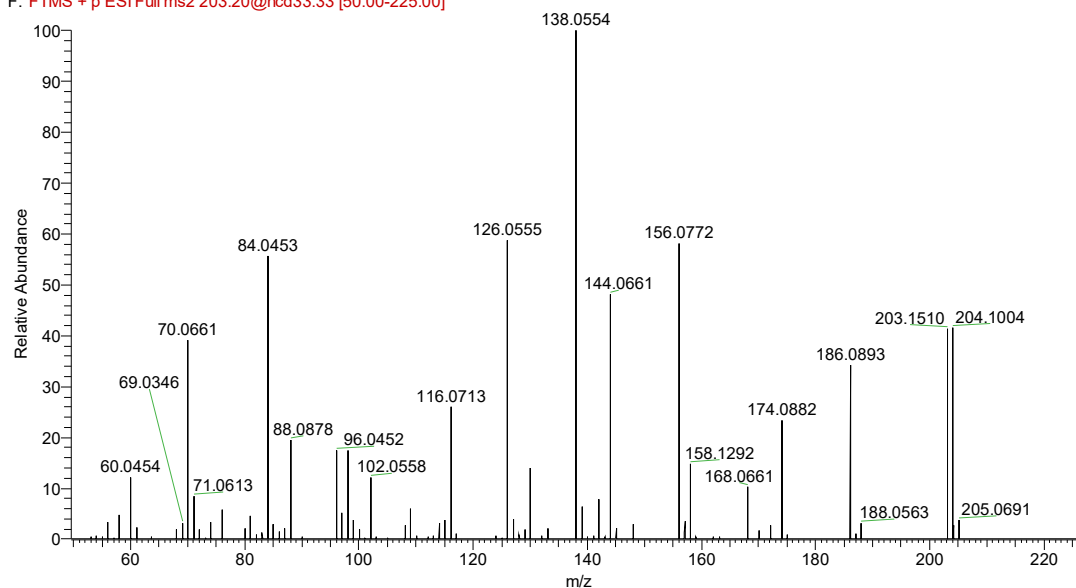

33 #233-393 RT: 0.85-1.36 AV: 80 NL: 2.33E8  
 F: FTMS + p ESI Full ms2 203.1503@hcd30.00 [50.0000-225.0000]

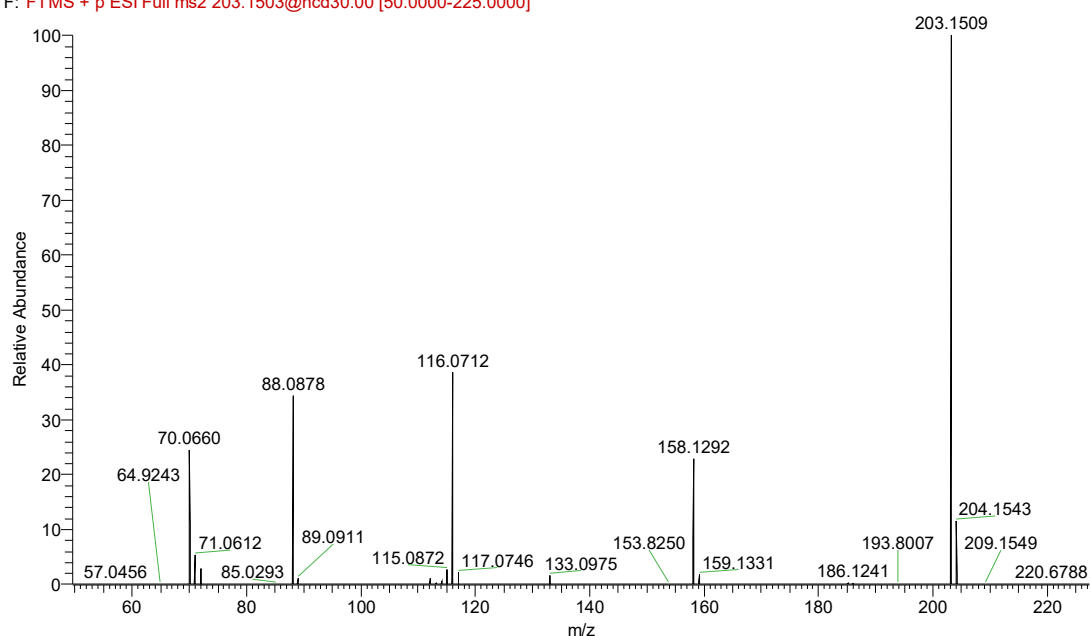

Figure S14. The MS/MS spectrum at  $m/z$  203.1510 (Table S10) identifies it as dimethylarginine when compared with the standard given in the standard dimethylarginine (below).

pos-ms2-0107 #578 RT: 1.66 AV: 1 SB: 35 1.12-1.53, 1.76-2.05 NL: 1.09E7  
 F: FTMS + p ESI Full ms2 204.10@hcd33.33 [50.00-230.00]

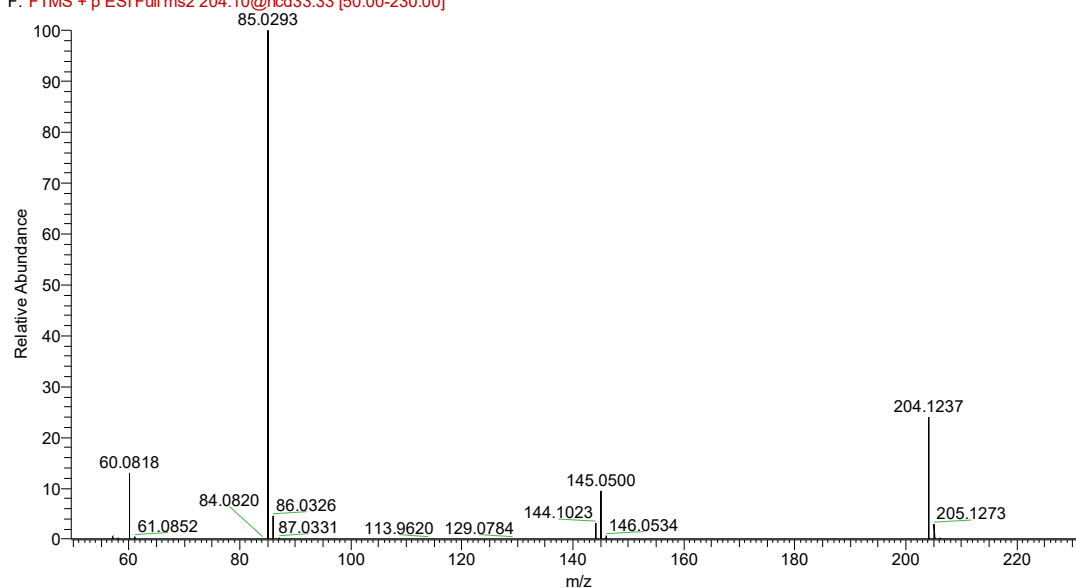

pos-1 #298 RT: 1.10 AV: 1 SB: 17 0.63-1.13, 1.28-2.06 NL: 6.45E7  
 F: FTMS + p ESI Full ms2 204.1230@hcd30.00 [50.0000-225.0000]

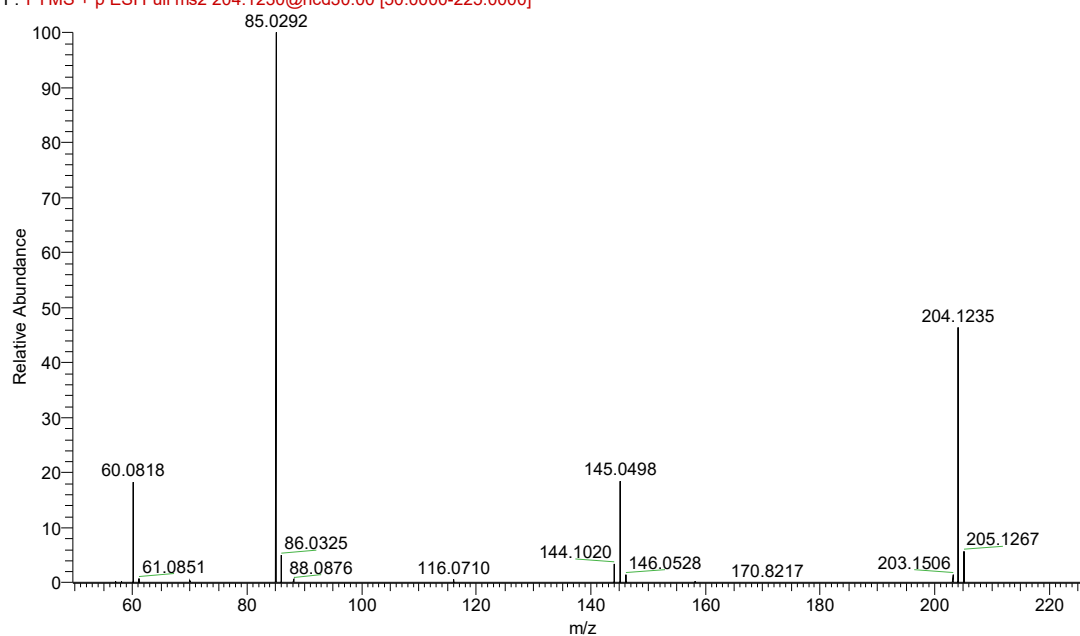

Figure S15. The MS/MS spectrum at  $m/z$  204.1237 (Table S10) identifies it as acetylcarnitine when compared with the standard given in the standard acetylcarnitine (below).



pos-ms2-0107 #1632 RT: 4.41 AV: 1 SB: 44 3.98-4.36 , 4.54-4.86 NL: 3.28E6  
 F: FTMS + p ESI Full ms2 232.20@hcd33.33 [50.00-255.00]

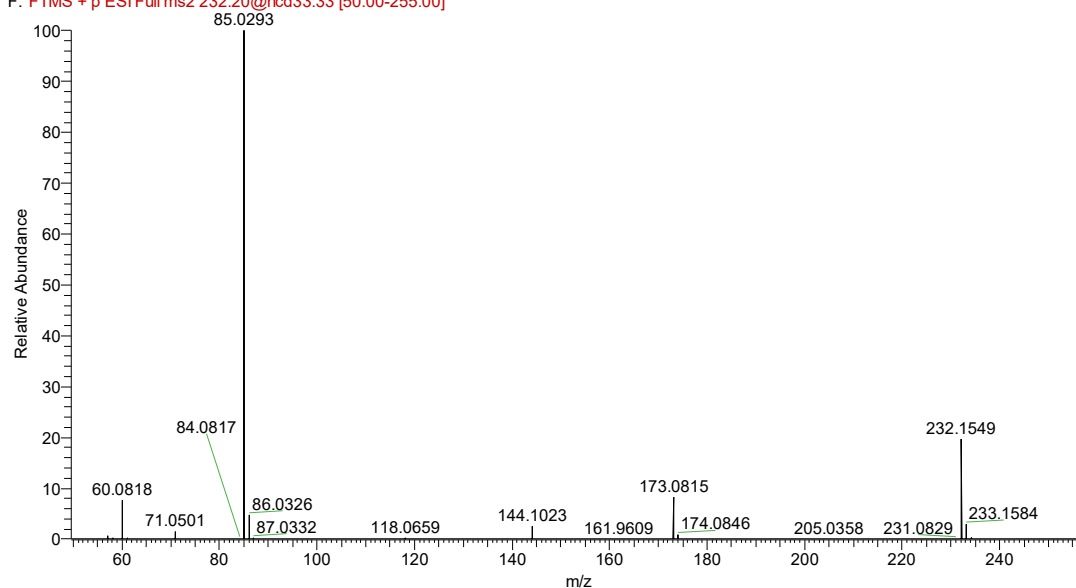

pos-1 #1196-1221 RT: 4.26-4.34 AV: 5 SB: 50 3.56-4.26 , 4.37-4.82 NL: 2.94E8  
 F: FTMS + p ESI Full ms2 232.1546@hcd30.00 [50.0000-255.0000]

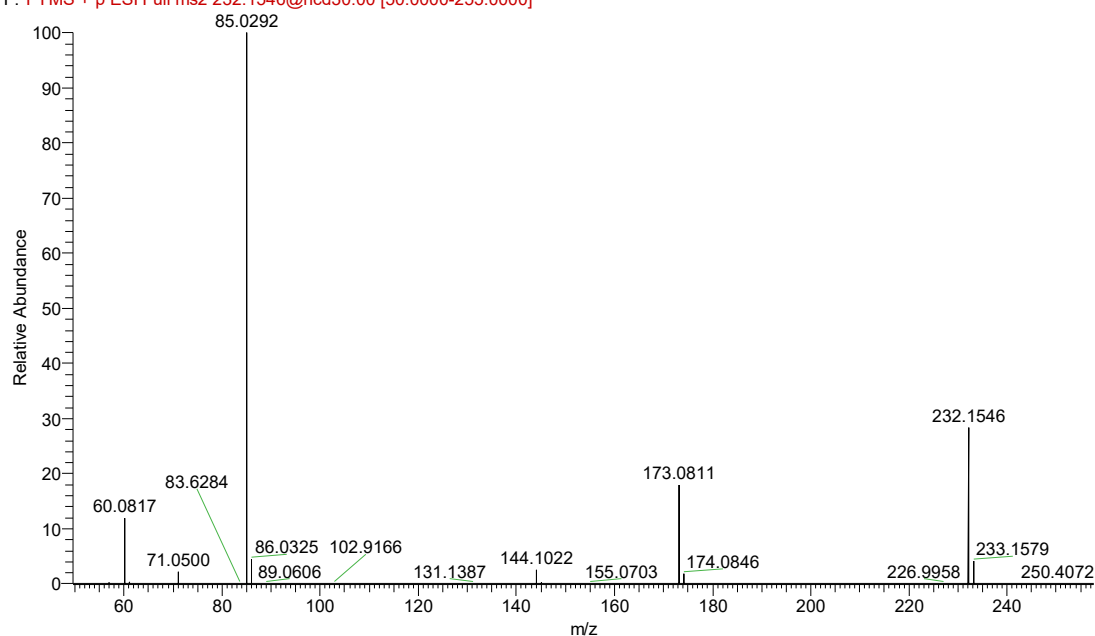

Figure S16. The MS/MS spectrum at  $m/z$  232.1549 (Table S10) identifies it as butyryl-L-carnitine when compared with the standard given in the standard butyryl-L-carnitine (below).

MS2-NEG-16 #167-189 RT: 1.02-1.08 AV: 2 SB: 8 0.34-0.91 , 1.11-1.70 NL: 4.85E6  
F: FTMS - p ESI Full ms2 124.00@hcd30.00 [50.00-150.00]

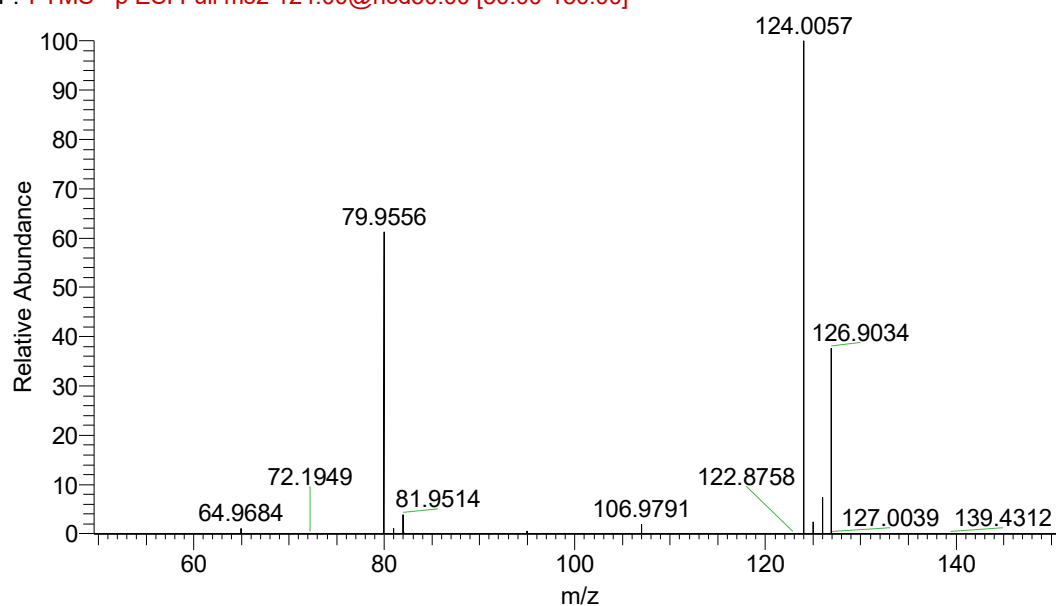

neg-1 #232-263 RT: 0.97-1.04 AV: 2 NL: 2.95E7  
F: FTMS - p ESI Full ms2 124.0056@hcd55.00 [50.0000-145.0000]

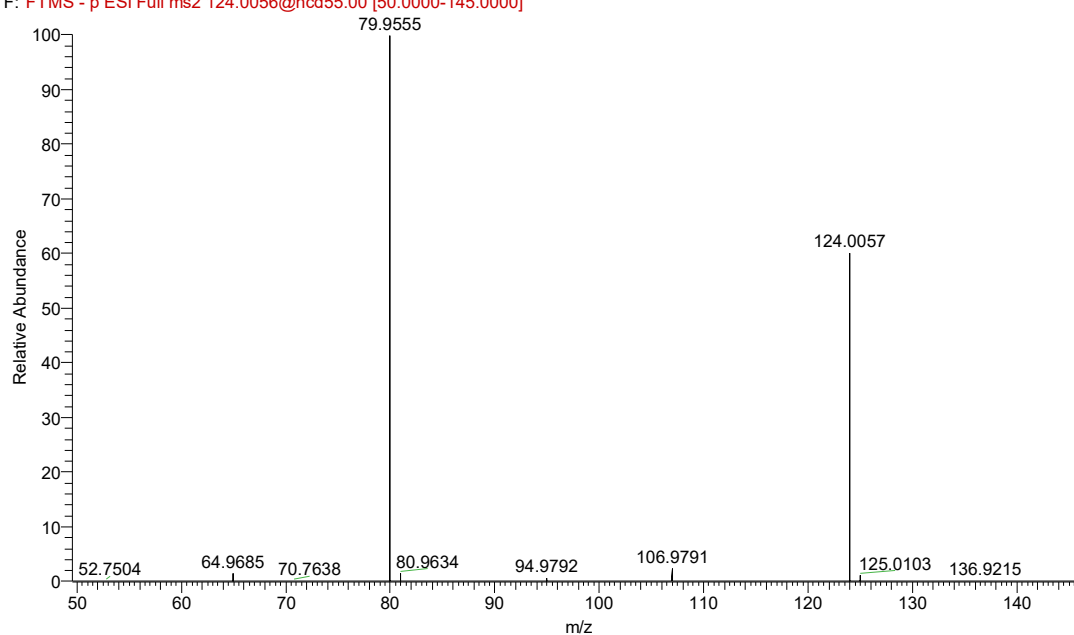

Figure S17. The MS/MS spectrum at  $m/z$  124.0057 (Table S10) identifies it as taurine when compared with the standard given in the standard taurine (below).

MS2-NEG-15 #452-473 RT: 2.27-2.34 AV: 5 SB: 30 1.85-2.20 , 2.39-2.50 NL: 6.83E4  
 F: FTMS - p ESI Full ms2 111.00@hcd30.00 [50.00-135.00]

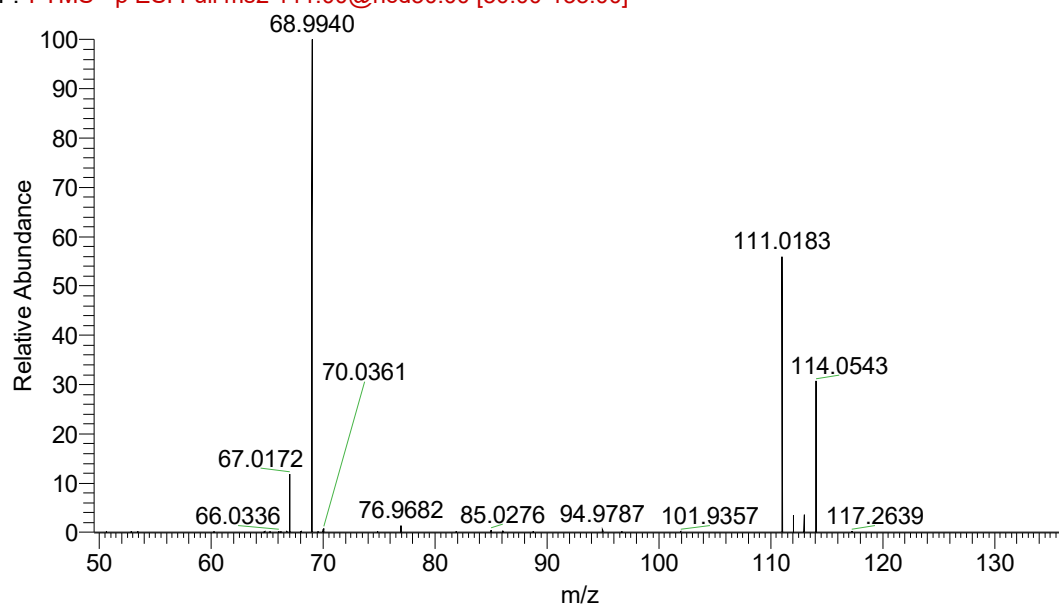

neg-1 #268-315 RT: 1.12-1.20 AV: 2 NL: 2.80E4  
 F: FTMS - p ESI Full ms2 111.0182@hcd100.00 [50.0000-130.0000]

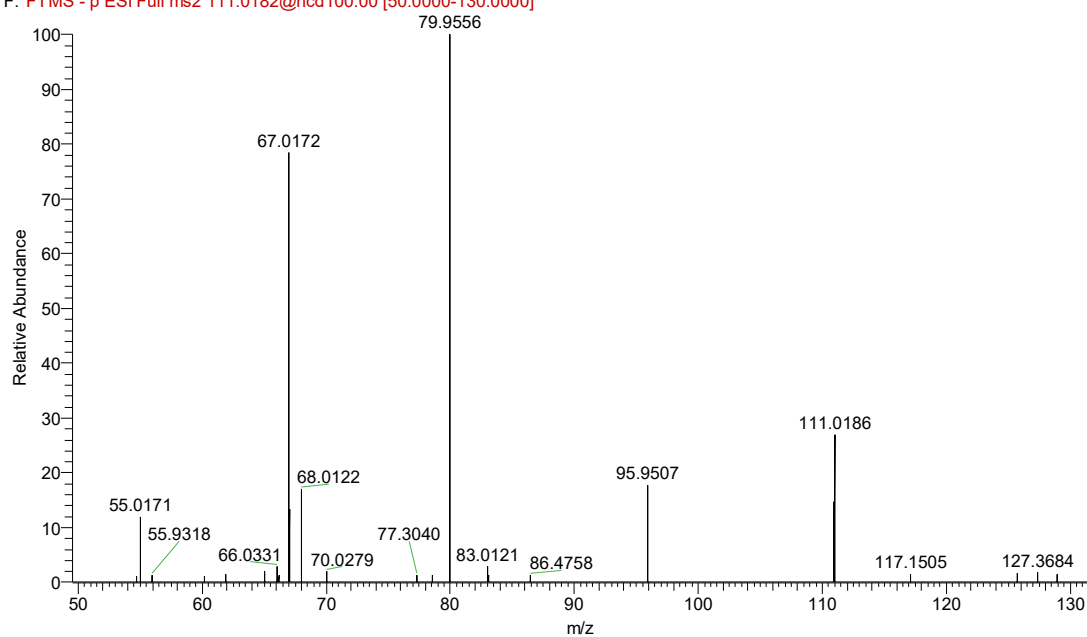

Figure S18. The MS/MS spectrum at  $m/z$  111.0183 (Table S10) identifies it as uracil when compared with the standard given in the standard uracil (below).

MS2-NEG-17 #179 RT: 1.05 AV: 1 SB: 11 0.01-0.96 , 1.13-1.37 NL: 3.36E4  
 F: FTMS - p ESI Full ms2 131.00@hcd30.00 [50.00-155.00]

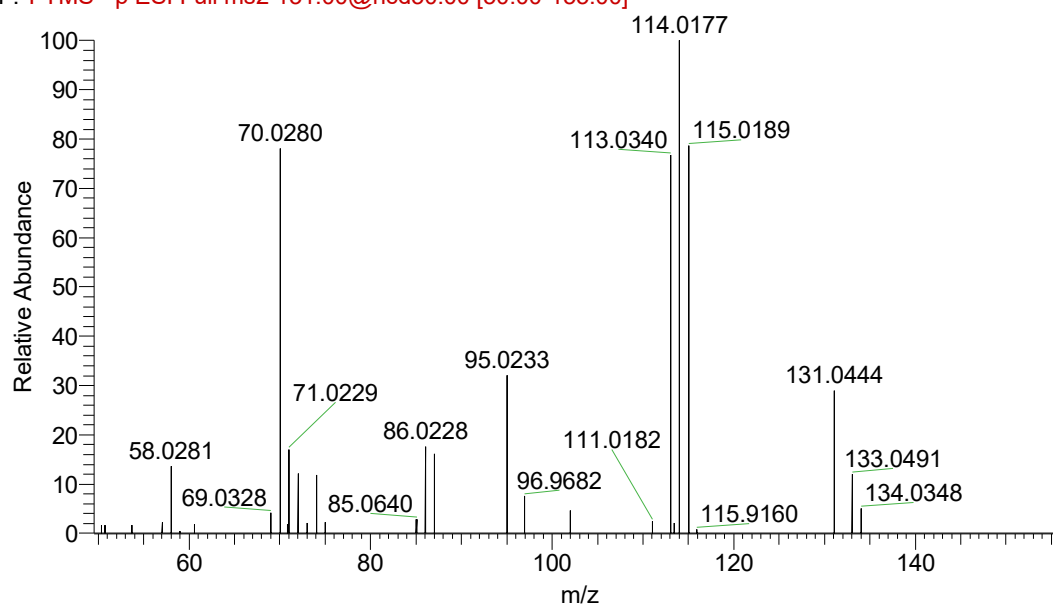

34 #382 RT: 1.36 AV: 1 NL: 5.48E7  
 F: FTMS - p ESI Full ms2 131.0446@hcd30.00 [50.0000-155.0000]

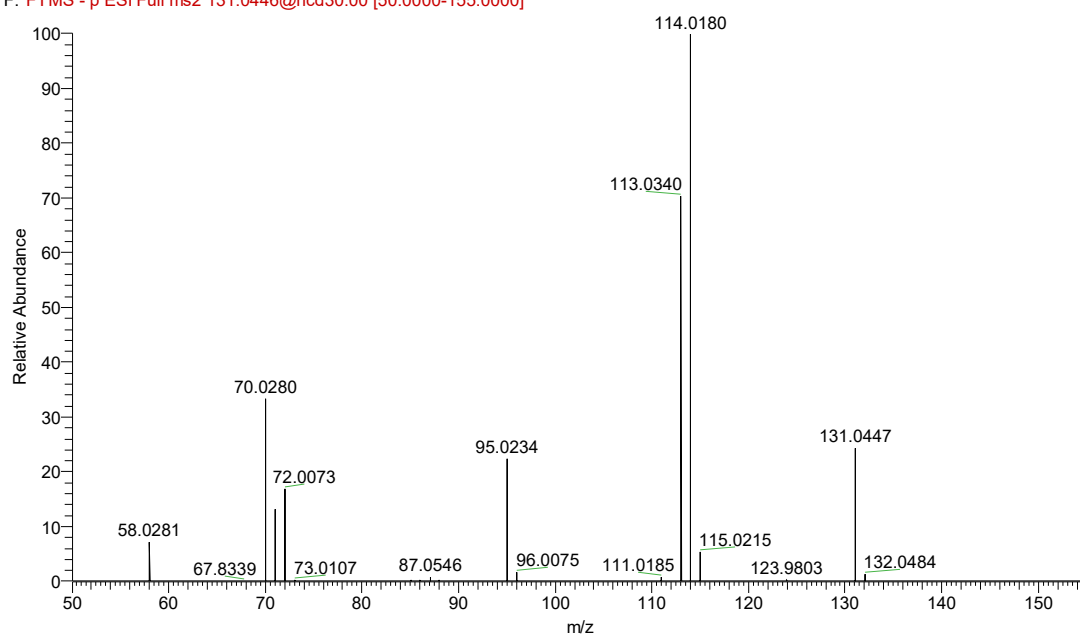

Figure S19. The MS/MS spectrum at  $m/z$  131.0444 (Table S10) identifies it as asparagine when compared with the standard given in the standard asparagine (below).

MS2-NEG-17 #395 RT: 2.04 AV: 1 SB: 35 1.49-1.97 , 2.14-2.72 NL: 3.62E6  
 F: FTMS - p ESI Full ms2 135.00@hcd30.00 [50.00-160.00]

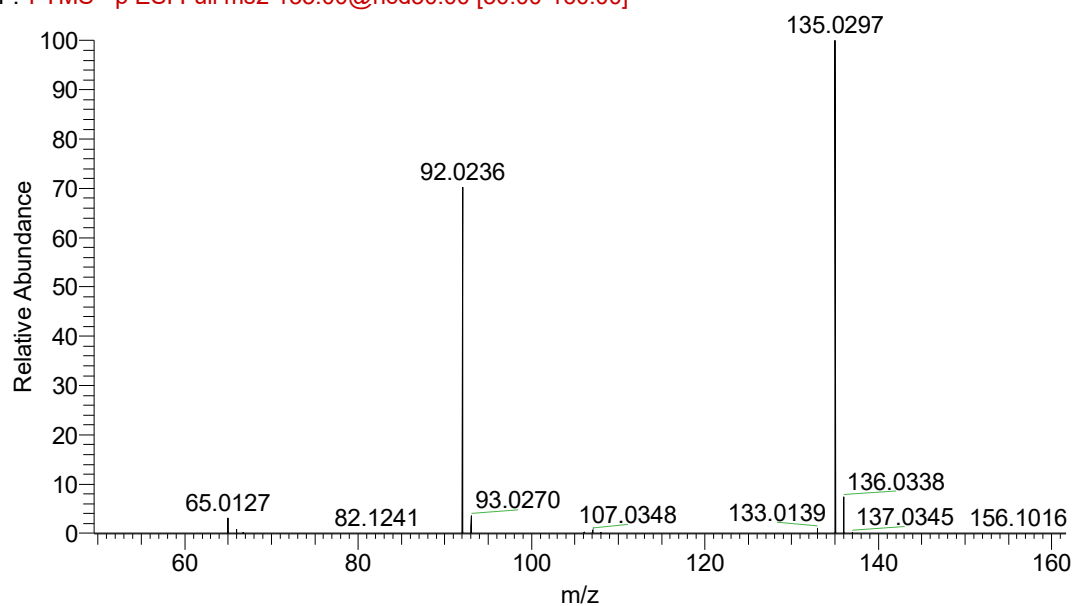

20 #334 RT: 1.22 AV: 1 NL: 2.56E7  
 F: FTMS - p ESI Full ms2 135.0295@hcd55.00 [50.0000-155.0000]

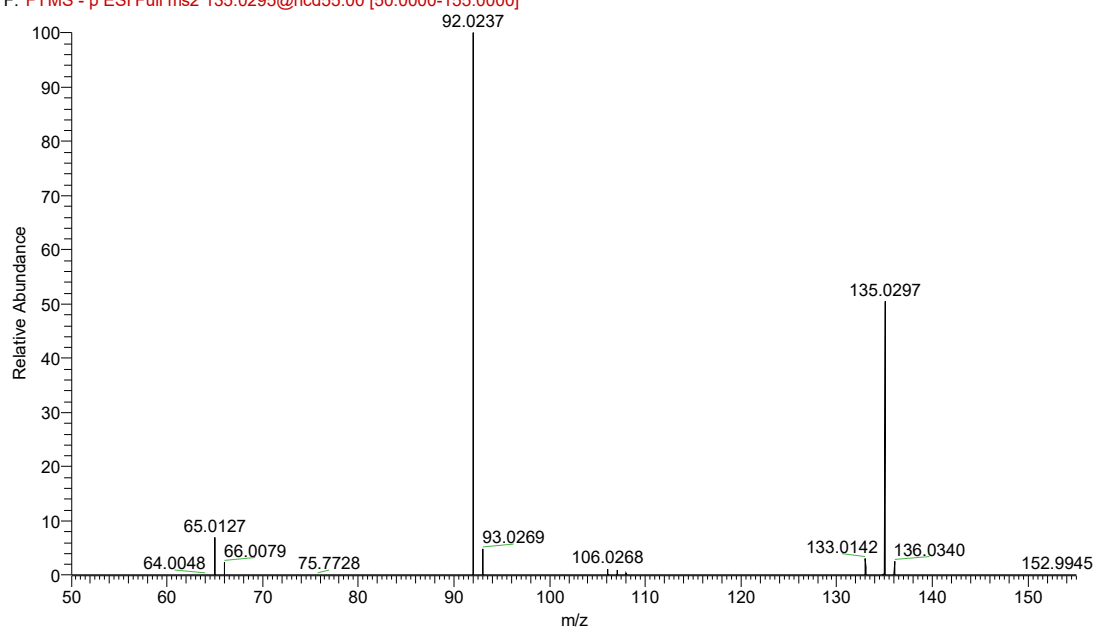

Figure S20. The MS/MS spectrum at  $m/z$  135.0297 (Table S10) identifies it as hypoxanthine when compared with the standard given in the standard hypoxanthine (below).

MS2-NEG-17 #171 RT: 1.03 AV: 1 SB: 12 0.01-0.95 , 1.07-1.51 NL: 4.62E5  
F: FTMS - p ESI Full ms2 140.00@hcd30.00 [50.00-165.00]

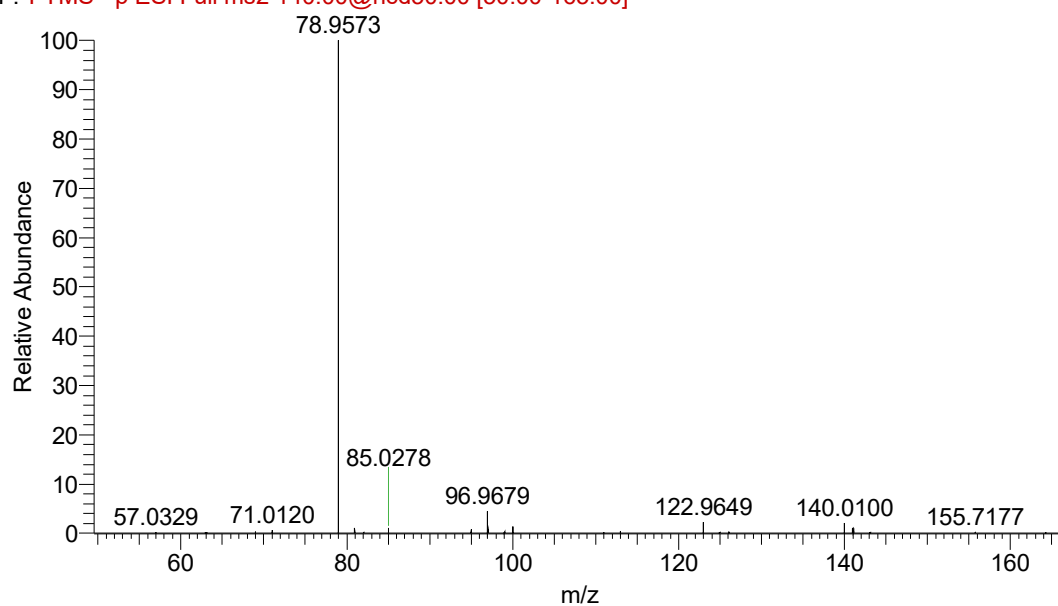

neg-1 #250 RT: 1.00 AV: 1 NL: 3.22E6  
F: FTMS - p ESI Full ms2 140.0101@hcd10.00 [50.0000-160.0000]

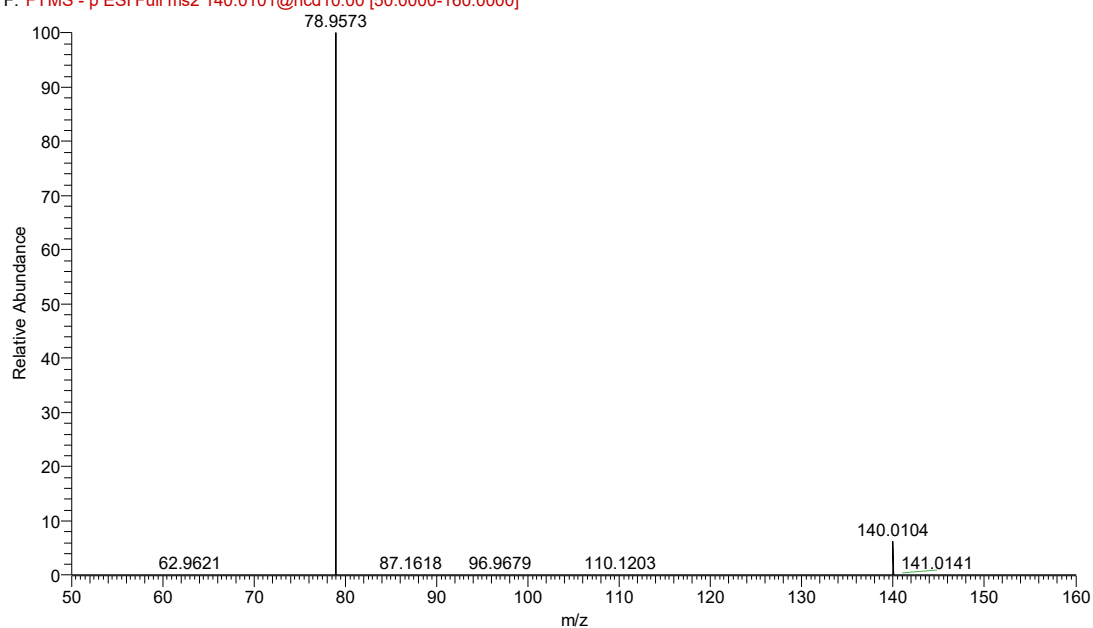

Figure S21. The MS/MS spectrum at  $m/z$  140.0100 (Table S10) identifies it as O-phosphorylethanolamine when compared with the standard given in the standard O-phosphorylethanolamine (below).

MS2-NEG-17 #175 RT: 1.04 AV: 1 SB: 13 0.63-1.01, 1.09-1.40 NL: 1.98E5  
 F: FTMS - p ESI Full ms2 145.00@hcd30.00 [50.00-170.00]

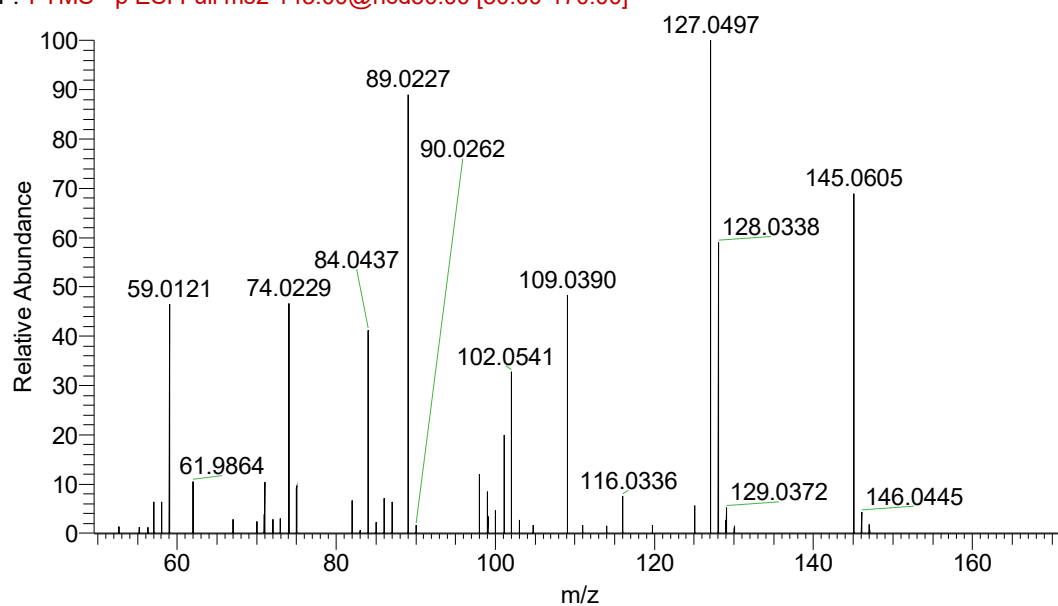

16 #374 RT: 1.35 AV: 1 NL: 4.28E7  
 F: FTMS - p ESI Full ms2 145.0602@hcd45.00 [50.0000-165.0000]

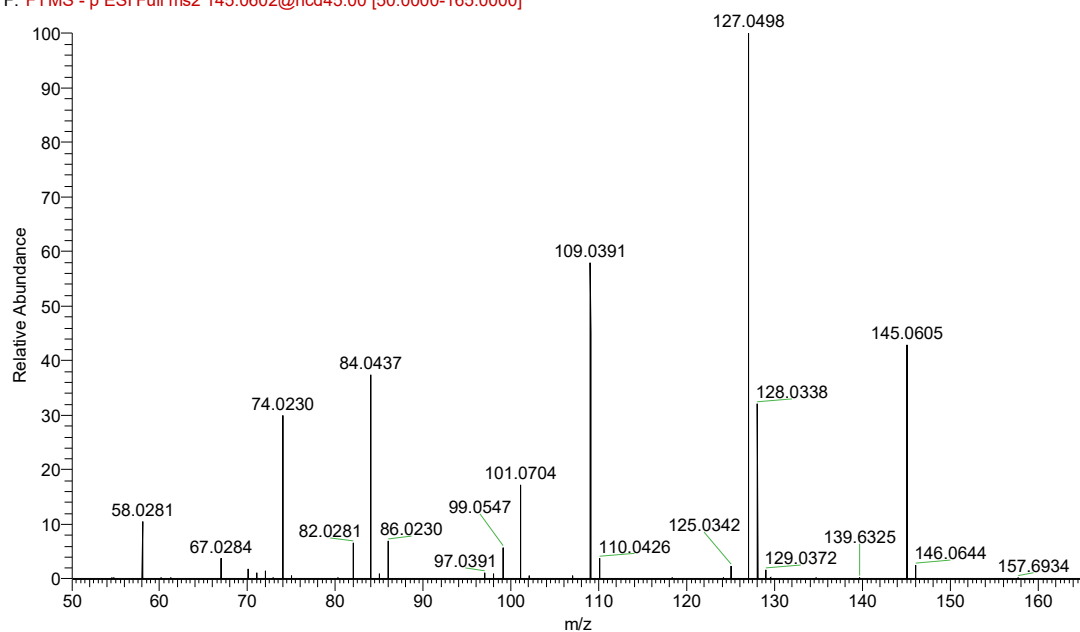

Figure S22. The MS/MS spectrum at  $m/z$  145.0605 (Table S10) identifies it as glutamine when compared with the standard given in the standard glutamine (below).

MS2-NEG-17 #145 RT: 0.94 AV: 1 SB: 11 0.22-0.85 , 1.00-1.51 NL: 1.16E7  
 F: FTMS - p ESI Full ms2 146.00@hcd30.00 [50.00-170.00]

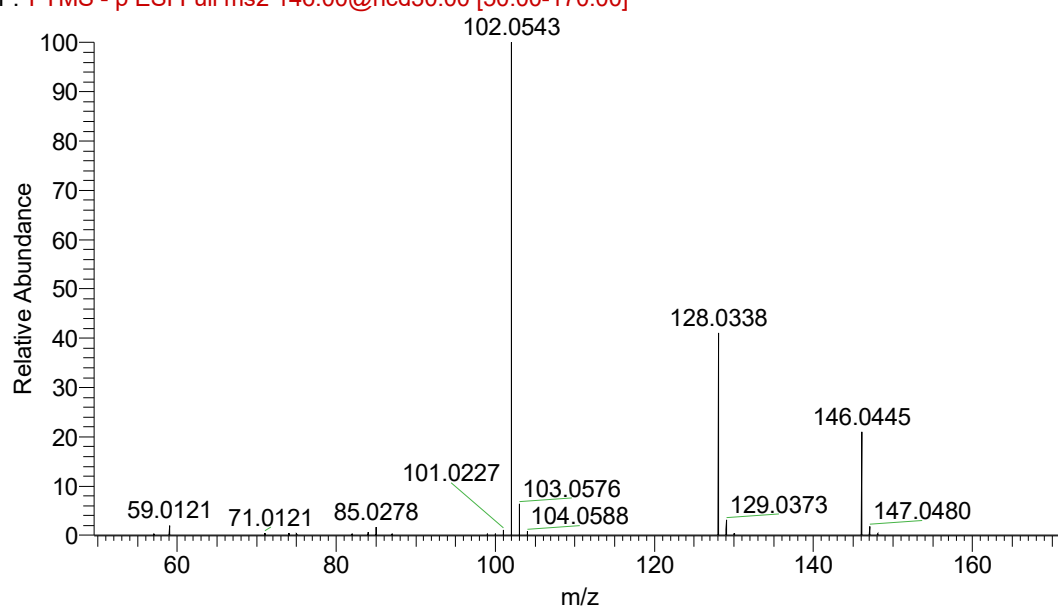

14 #364 RT: 1.35 AV: 1 NL: 6.14E7

F: FTMS - p ESI Full ms2 146.0442@hcd30.00 [50.0000-170.0000]

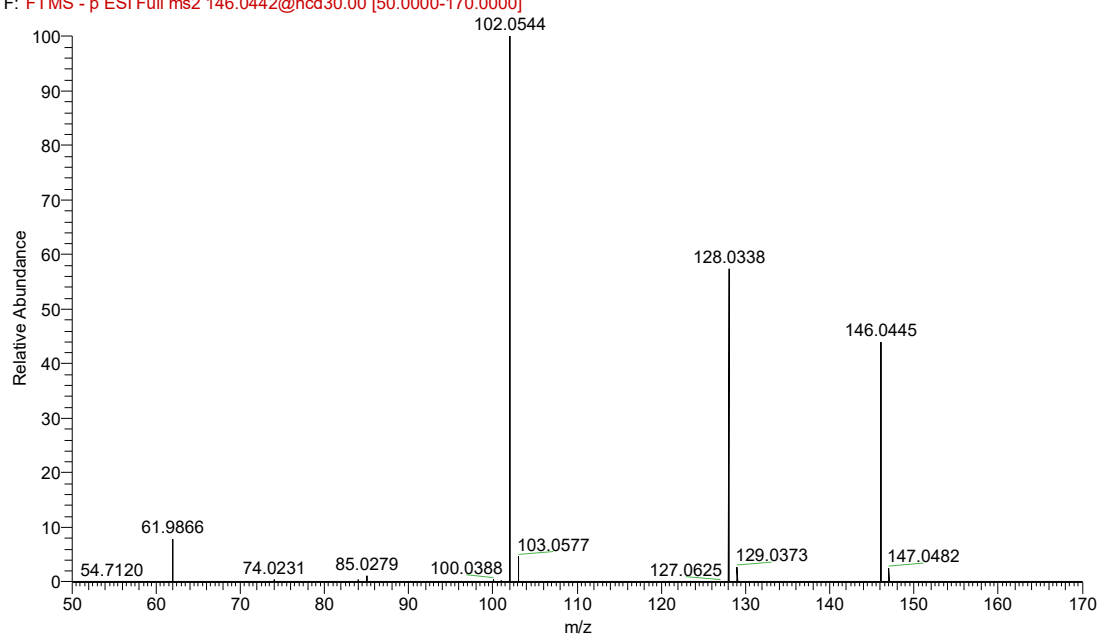

Figure S23 The MS/MS spectrum at  $m/z$  146.0445 (Table S10) identifies it as glutamate when compared with the standard given in the standard glutamate (below).



MS2-NEG-18 #179 RT: 1.05 AV: 1 SB: 19 0.67-1.00 , 1.10-1.34 NL: 1.03E5  
 F: FTMS - p ESI Full ms2 154.10@hcd30.00 [50.00-180.00]

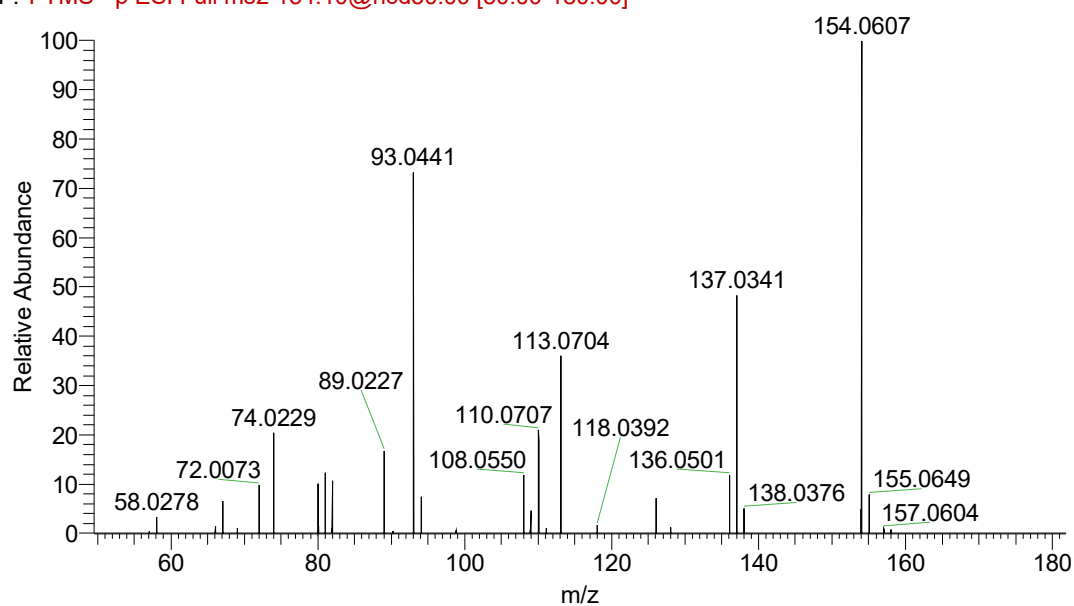

neg-1 #236 RT: 0.95 AV: 1 NL: 7.52E6  
 F: FTMS - p ESI Full ms2 154.0605@hcd45.00 [50.0000-175.0000]

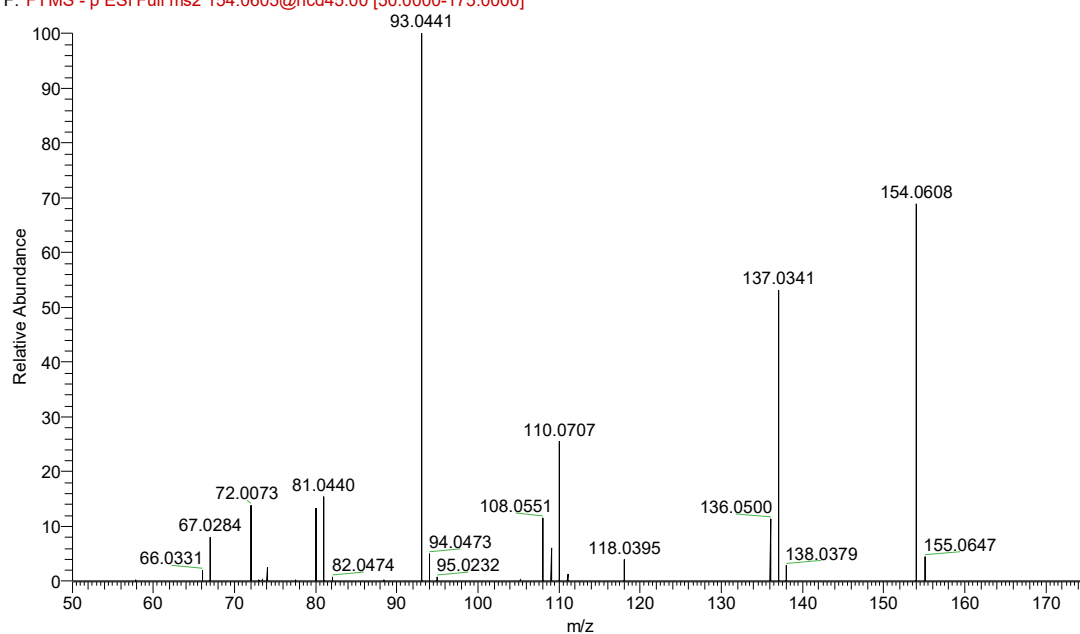

Figure S24. The MS/MS spectrum at  $m/z$  154.0607 (Table S10) identifies it as histidine when compared with the standard given in the standard histidine (below).

MS2-NEG-18 #759 RT: 3.67 AV: 1 SB: 43 2.74-3.61 , 3.75-4.19 NL: 5.43E5  
 F: FTMS - p ESI Full ms2 164.10@hcd30.00 [50.00-190.00]

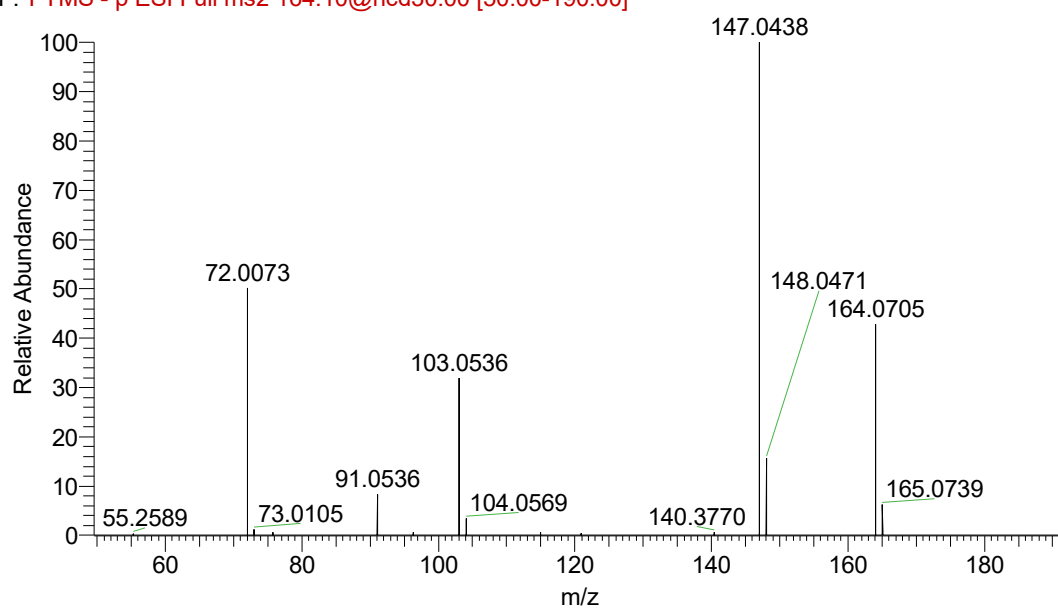

neg-1 #568 RT: 2.19 AV: 1 SB: 38 1.50-2.16 , 3.39-4.42 NL: 3.47E4  
 F: FTMS - p ESI Full ms2 164.0701@hcd28.00 [50.0000-185.0000]

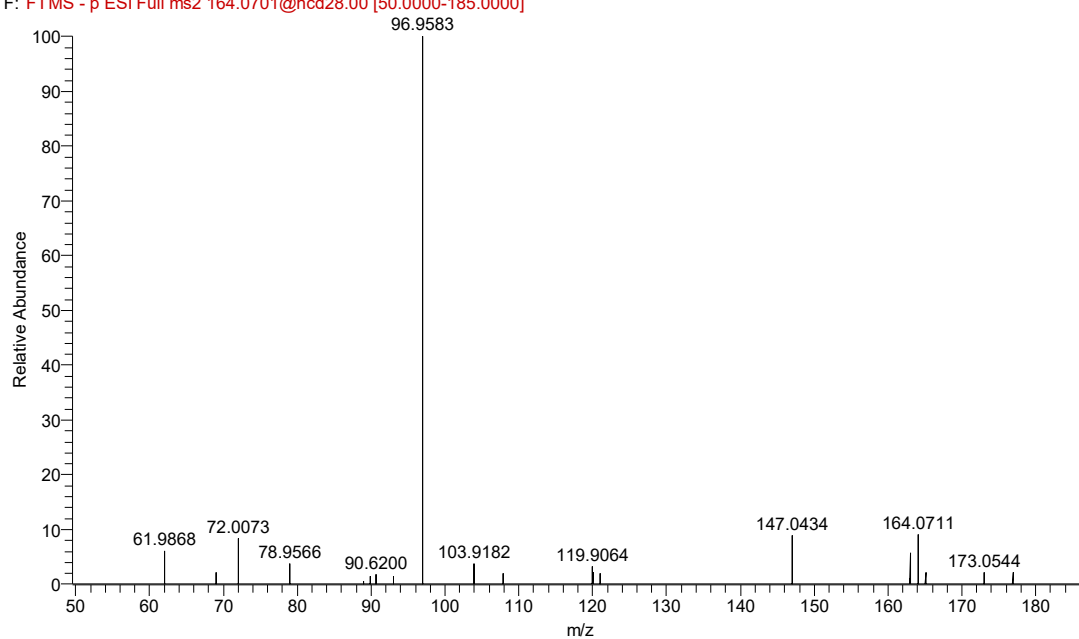

Figure S25. The MS/MS spectrum at  $m/z$  164.0705 (Table S10) identifies it as phenylalanine when compared with the standard given in the standard phenylalanine (below).

MS2-NEG-19 #137 RT: 0.91 AV: 1 SB: 15 0.46-0.90 , 0.98-1.24 NL: 6.40E5  
F: FTMS - p ESI Full ms2 174.00@hcd30.00 [50.00-200.00]

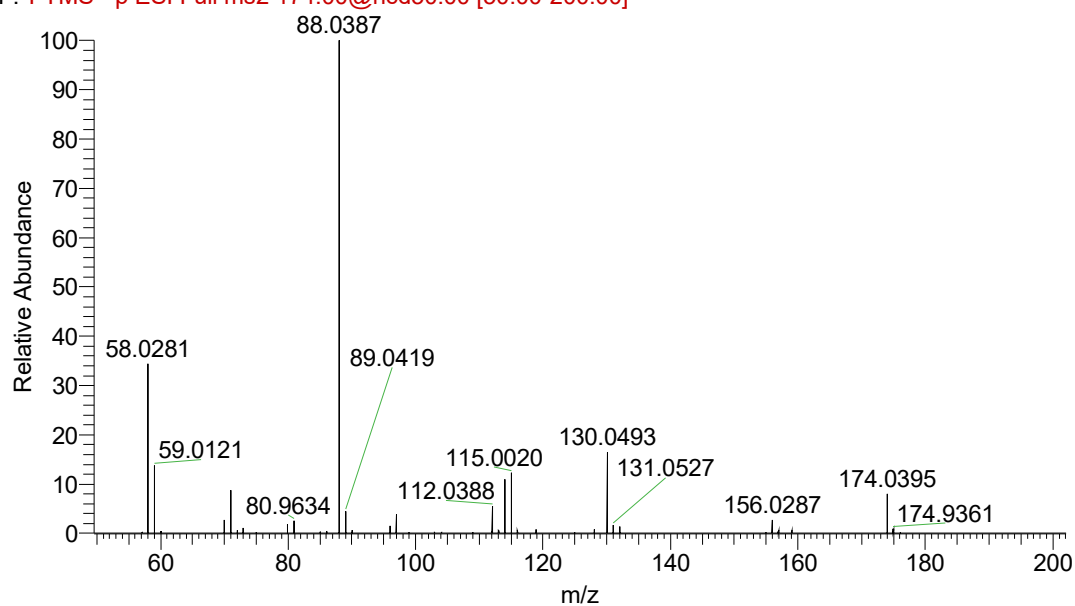

29 #248-315 RT: 0.91-1.12 AV: 34 NL: 5.34E7  
F: FTMS - p ESI Full ms2 174.0394@hcd25.00 [50.0000-195.0000]

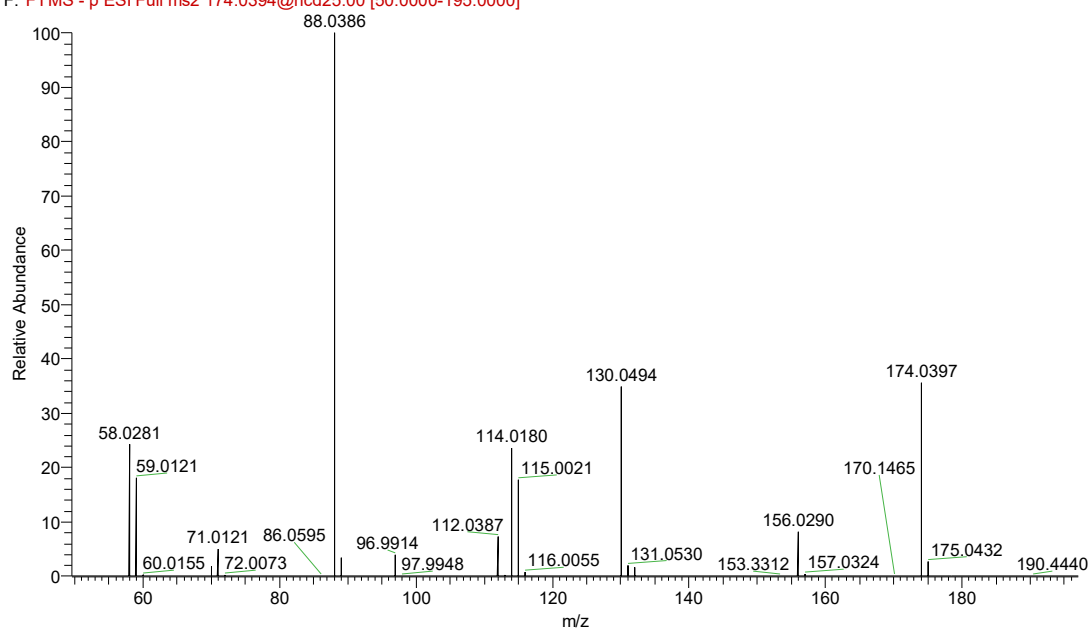

Figure S26. The MS/MS spectrum at  $m/z$  174.0395 (Table S10) identifies it as N-acetylaspartate when compared with the standard given in the standard N-acetylaspartate (below).

MS2-NEG-19 #417 RT: 2.09 AV: 1 SB: 30 1.10-1.94 , 2.17-2.67 NL: 9.56E4  
 F: FTMS - p ESI Full ms2 175.00@hcd30.00 [50.00-200.00]

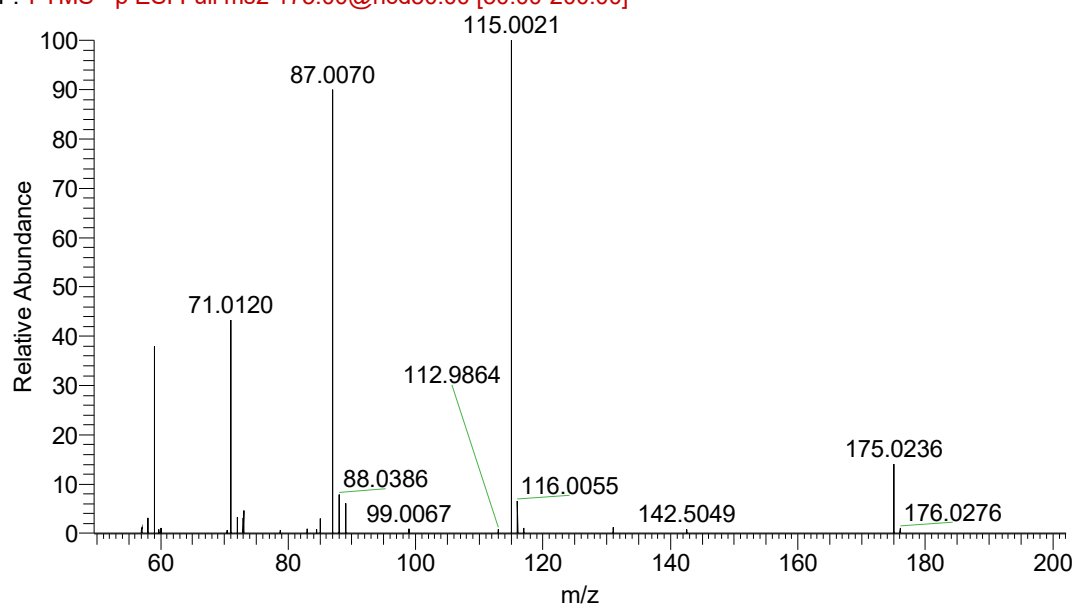

2 #251-310 RT: 0.98-1.17 AV: 30 NL: 2.21E8  
 F: FTMS - p ESI Full ms2 175.0233@hcd25.00 [50.0000-200.0000]

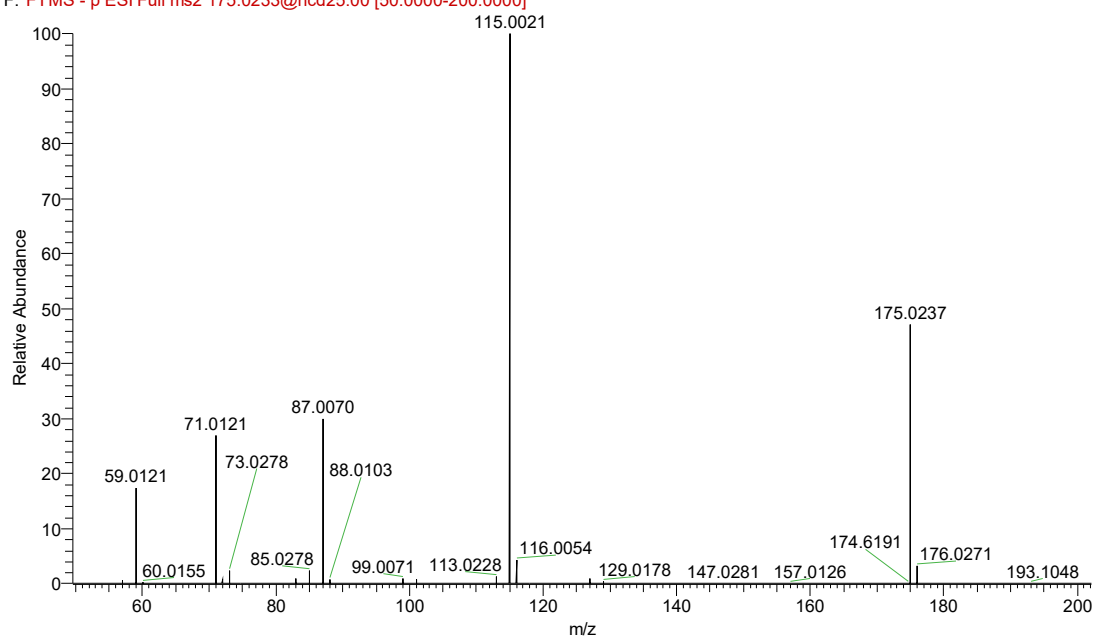

Figure S27. The MS/MS spectrum at  $m/z$  175.0236 (Table S10) identifies it as ascorbic acid when compared with the standard given in the standard ascorbic acid (below).

MS2-NEG-28 #1183 RT: 7.90 AV: 1 SB: 68 3.22-7.81, 8.22-10.78 NL: 2.27E3  
 F: FTMS - p ESI Full ms2 381.20@hcd16.00 [50.00-410.00]

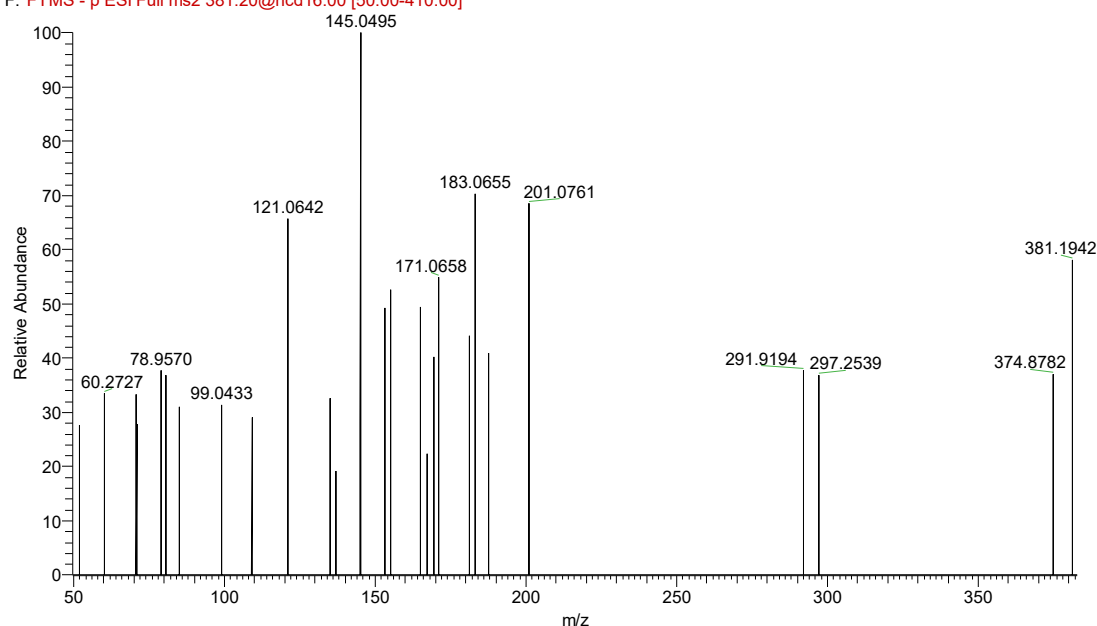

Figure S28. The MS/MS spectrum at  $m/z$  381.1942 (Table S10) identifies it as 12-Oxo-20-trihydroxy-leukotriene B4 when compared with the standard given in the online metabolite database.

MS2-NEG-28 #1264-1324 RT: 8.33-8.61 AV: 8 SB: 19 4.53-6.96, 9.12-11.44 NL: 2.15E3  
 F: FTMS - p ESI Full ms2 383.20@hcd16.00 [50.00-410.00]

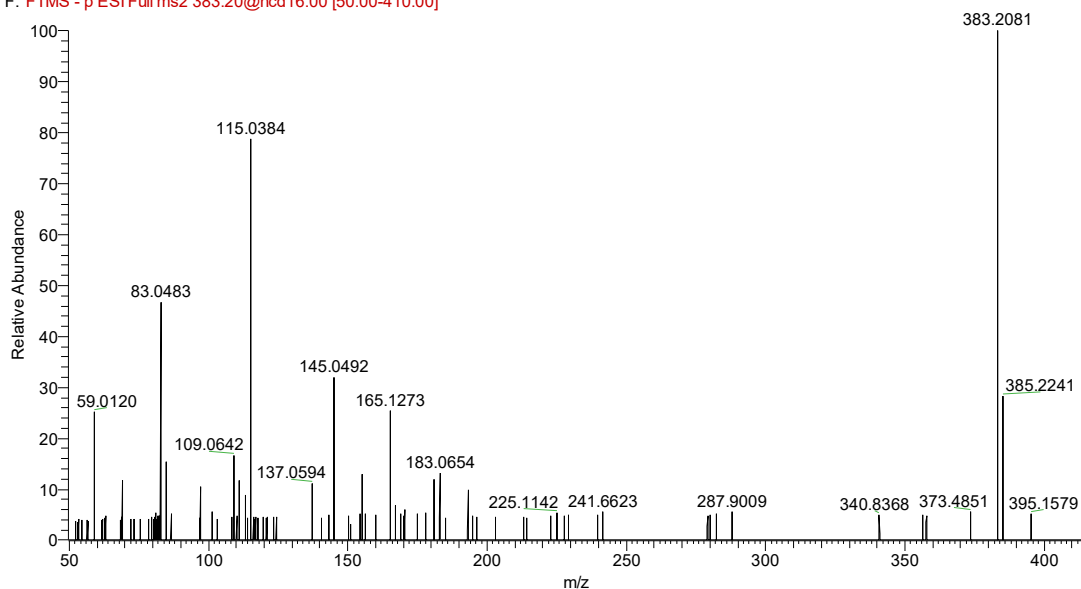

Figure S29. The MS/MS spectrum at  $m/z$  383.2081 (Table S10) identifies it as 20-Trihydroxy-leukotriene-B4 when compared with the standard given in the online metabolite database.

MS2-NEG-34 #3306-3380 RT: 22.11-22.39 AV: 12 SB: 83 19.59-21.50 , 22.73-24.84 NL: 3.09E4  
 F: FTMS - p ESI Full ms2 722.50@hcd20.00 [50.67-760.00]

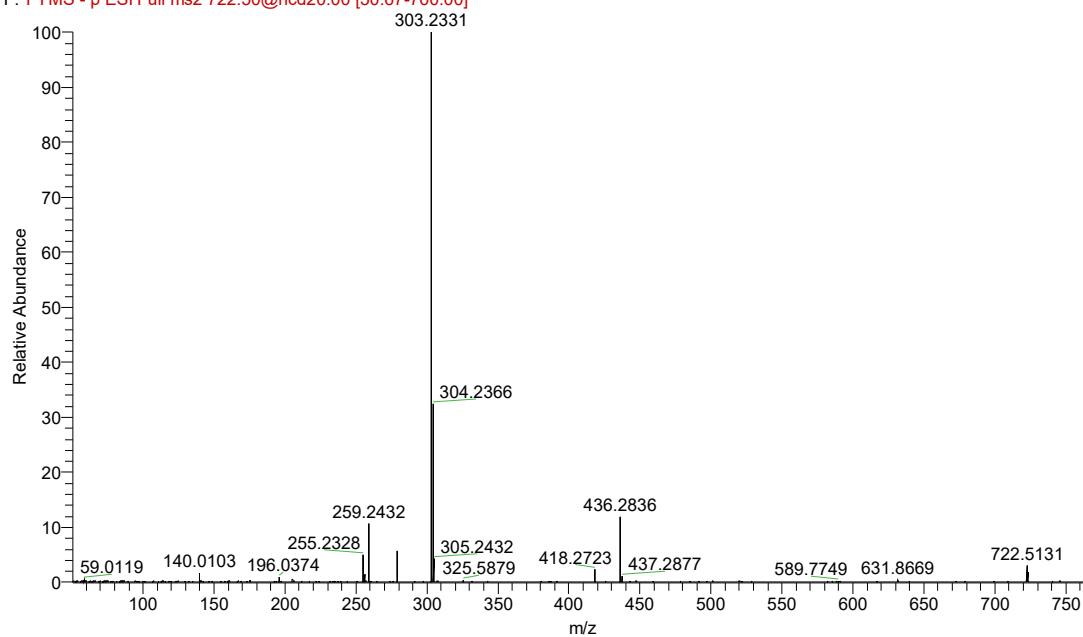

neg-1 #3818-4041 RT: 20.64-21.50 AV: 56 NL: 5.13E3  
 F: FTMS - p ESI Full ms2 722.5127@hcd15.00 [50.3333-755.0000]

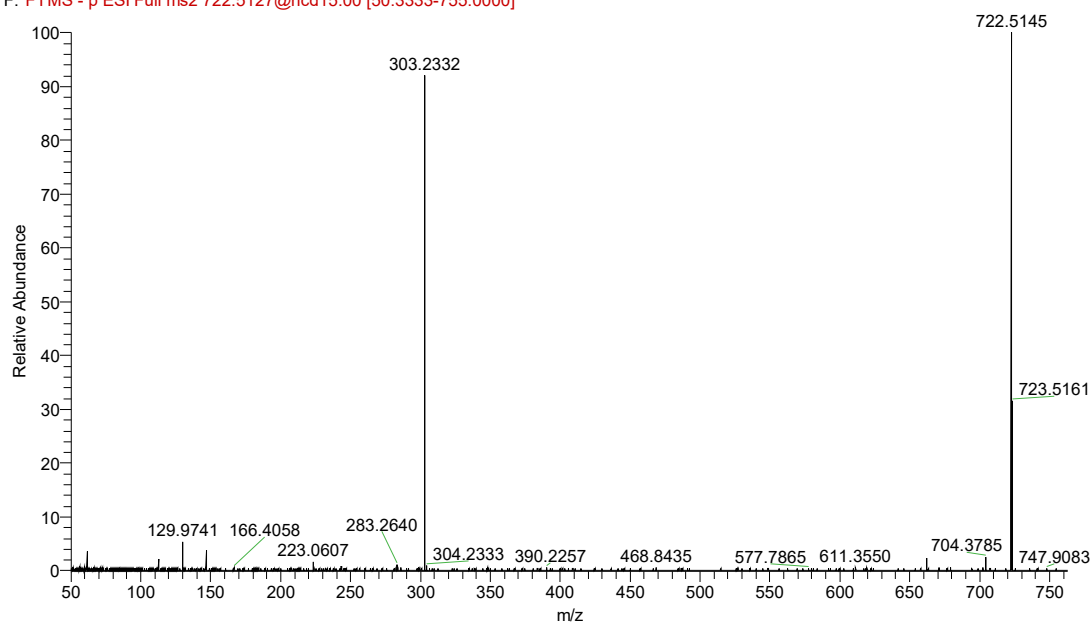

Figure S30. The MS/MS spectrum at  $m/z$  722.5131 (Table S10) identifies it as PE(36:4) when compared with the standard given in the standard PE(36:4) (below).

171008-ZUHE-PRM-3 #6594-6616 RT: 22.87-22.91 AV: 3 SB: 111 21.07-22.85 , 22.91-24.00 NL:  
F: FTMS - p ESI Full ms2 766.5386@hcd16.00 [50.0000-800.0000]

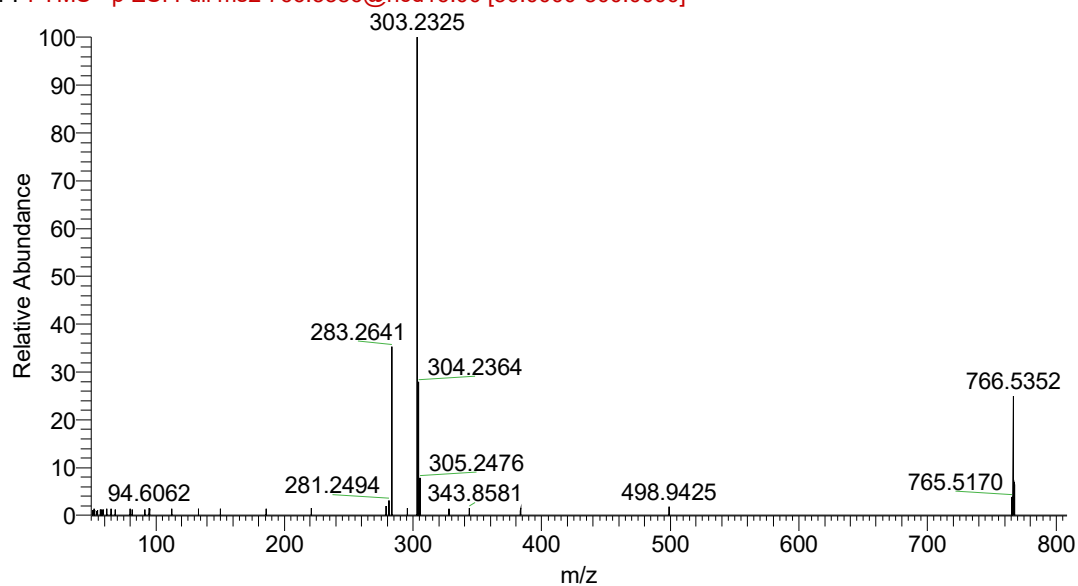

neg-1 #3848-4171 RT: 20.76-22.03 AV: 81 NL: 2.23E3  
F: FTMS - p ESI Full ms2 766.5386@hcd15.00 [53.3333-800.0000]

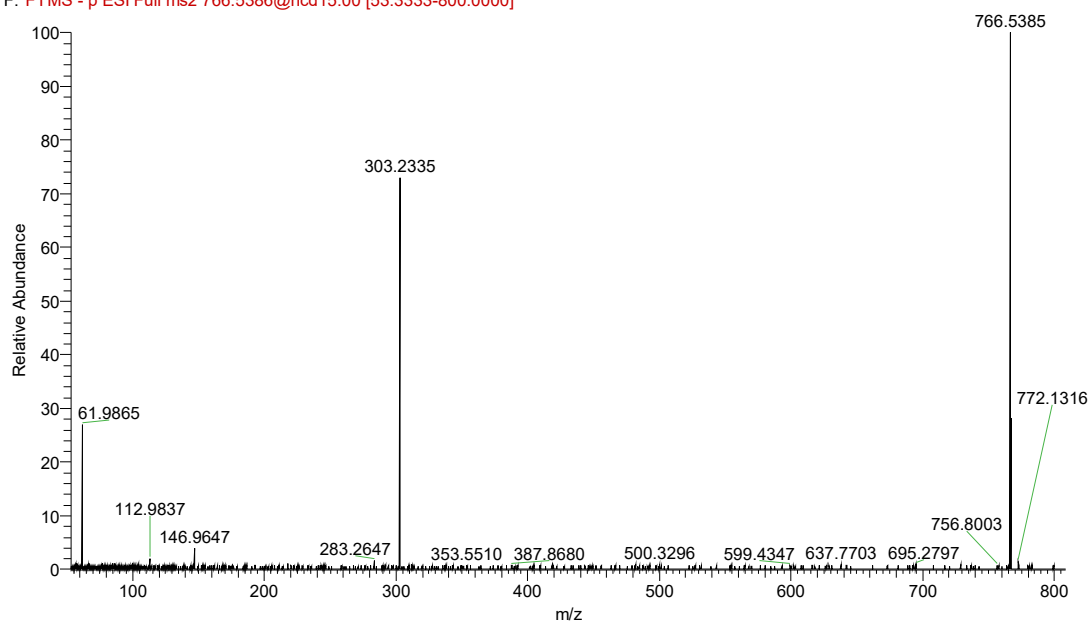

Figure S31. The MS/MS spectrum at  $m/z$  766.5352 (Table S10) identifies it as PE(38:4) when compared with the standard given in the standard PE(38:4) (below).

pos-ms2-0125 #297 RT: 0.96 AV: 1 SB: 50 0.17-0.83 , 1.04-1.58 NL: 3.07E4  
 F: FTMS + p ESI Full ms2 112.10@hcd40.00 [50.00-135.00]

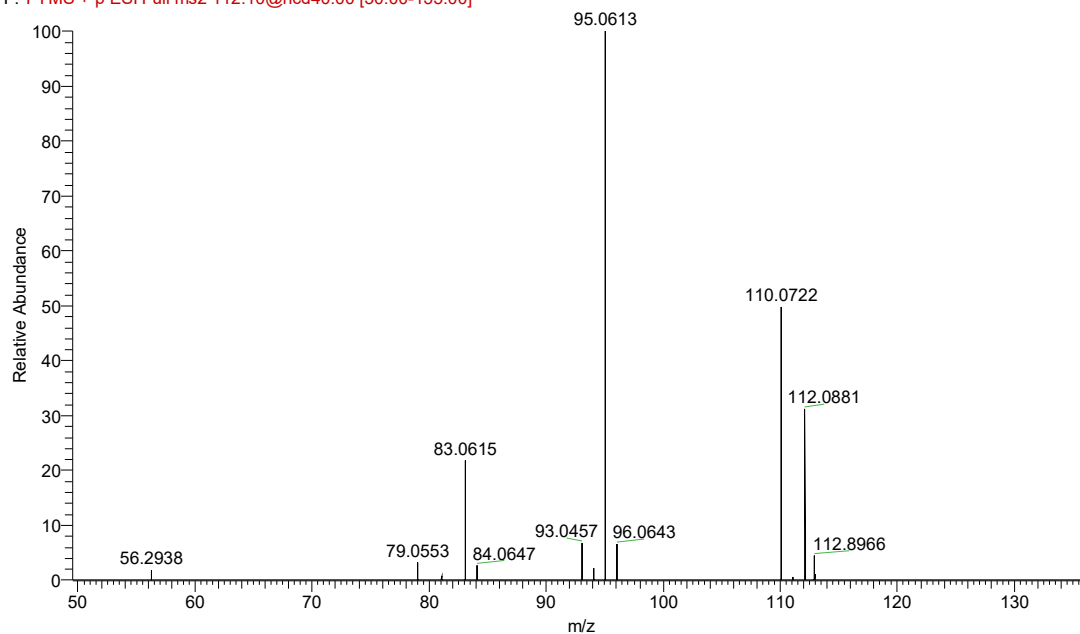

pos-1 #193-240 RT: 0.80-0.88 AV: 2 NL: 1.96E8  
 F: FTMS + p ESI Full ms2 112.0872@hcd40.00 [50.0000-135.0000]

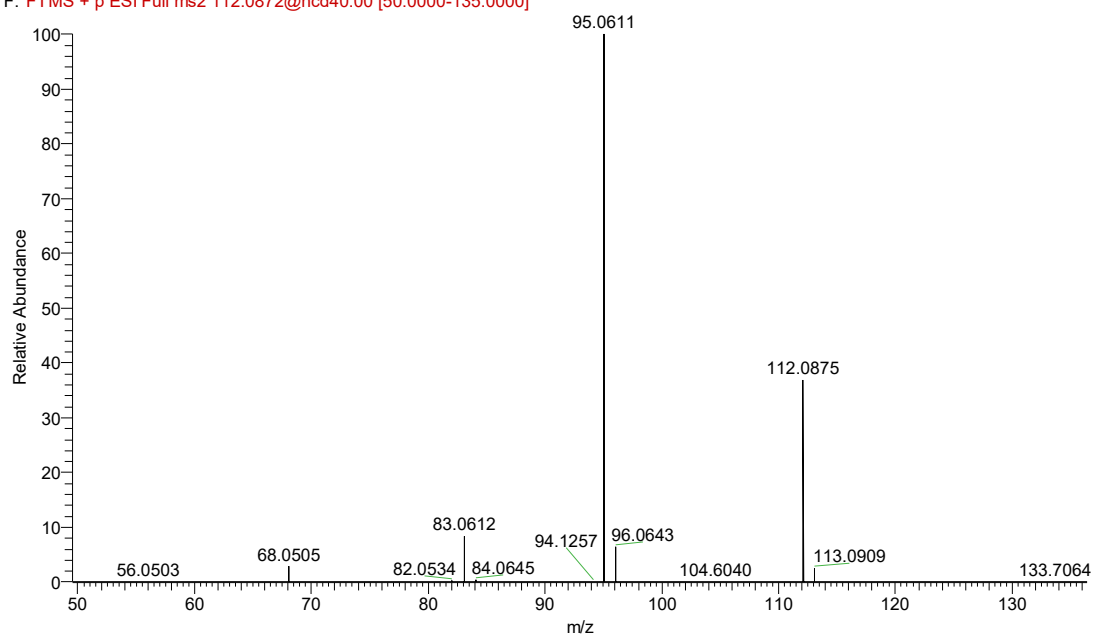

Figure S32. The MS/MS spectrum at  $m/z$  112.0881 (Table S13) identifies it as histamine when compared with the standard given in the standard histamine (below).



pos-ms2-0105 #1186 RT: 3.24 AV: 1 SB: 46 2.69-3.23 , 3.34-3.75 NL: 5.25E6

F: FTMS + p ESI Full ms2 268.10@hcd33.33 [50.00-295.00]

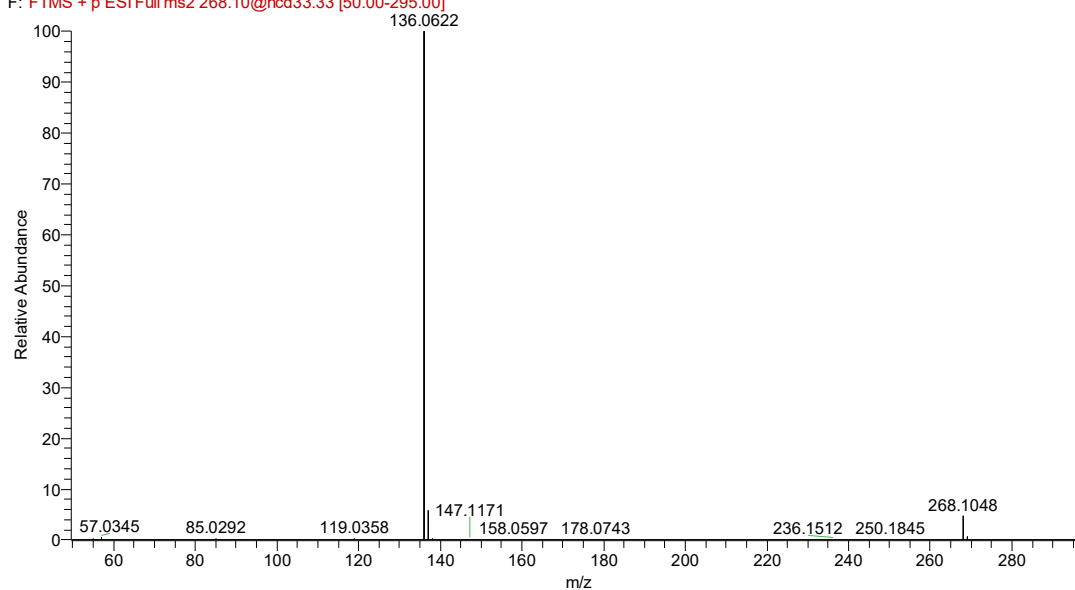

pos-1 #822-862 RT: 2.93-2.98 AV: 2 NL: 1.28E8

F: FTMS + p ESI Full ms2 268.1037@hcd25.00 [50.0000-290.0000]

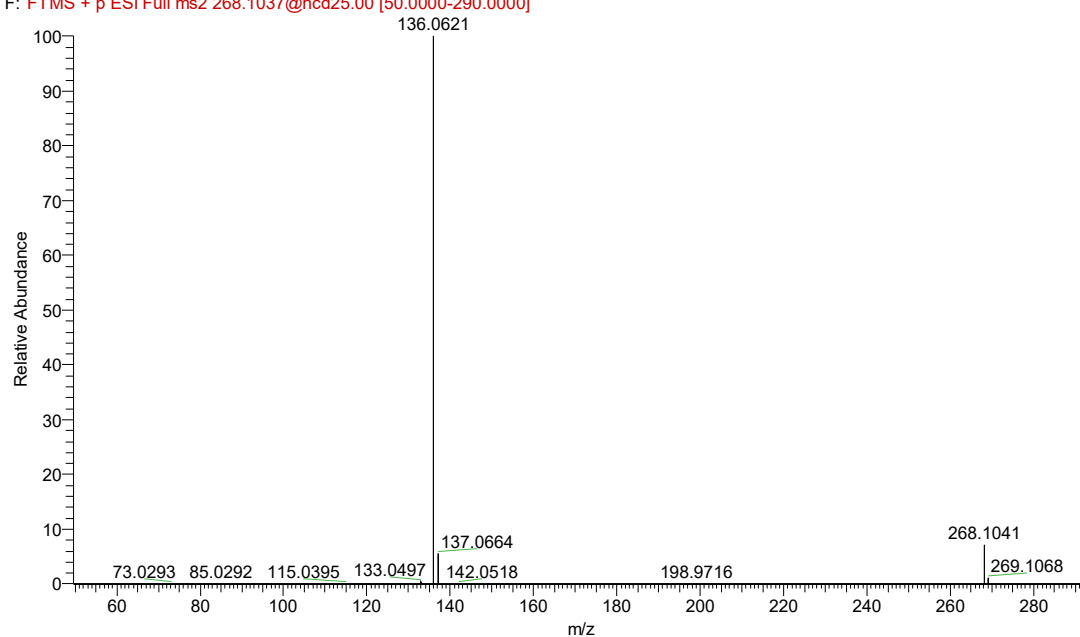

Figure S33. The MS/MS spectrum at  $m/z$  268.1048 (Table S13) identifies it as adenosine when compared with the standard given in the standard adenosine (below).

MS2-NEG-01 #749 RT: 4.16 AV: 1 SB: 137 1.52-3.60 , 4.38-5.14 NL: 1.08E6  
F: FTMS - p ESI Full ms2 134.00@hcd33.33 [50.00-160.00]

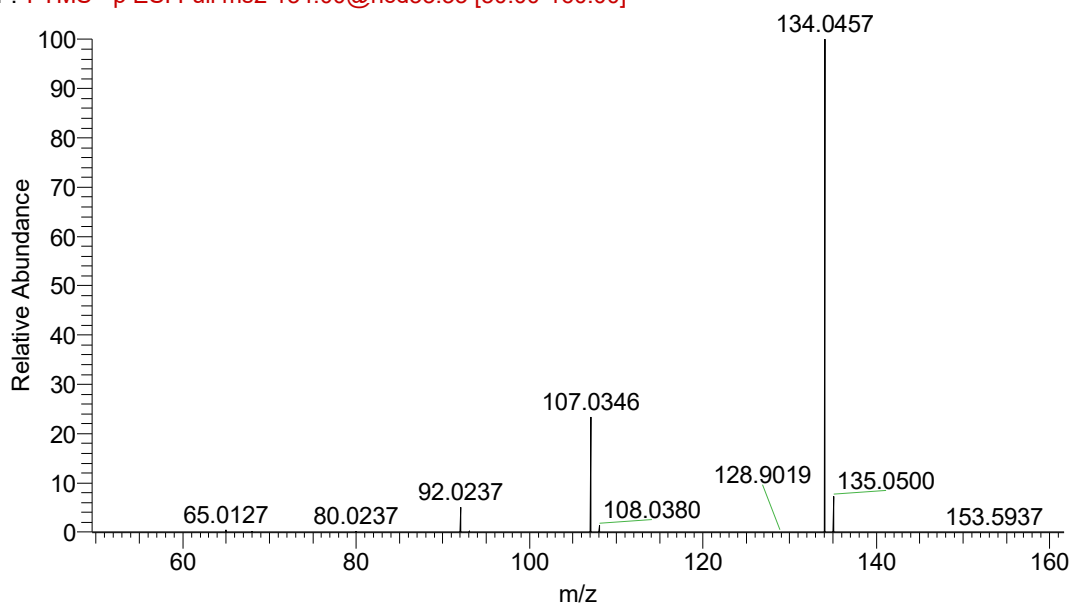

32\_180329132105 #229-298 RT: 0.89-1.13 AV: 35 NL: 1.98E6  
F: FTMS - p ESI Full ms2 134.0451@hcd40.00 [50.0000-155.0000]

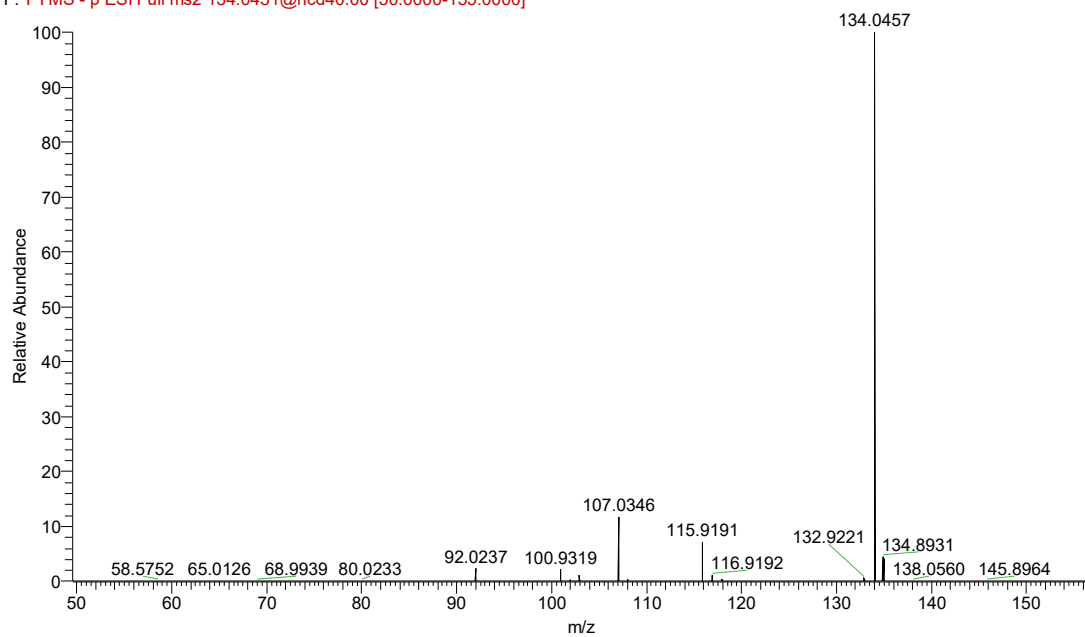

Figure S34. The MS/MS spectrum at  $m/z$  134.0457 (Table S13) identifies it as adenine when compared with the standard given in the standard adenine (below).

MS2-NEG-01 #139 RT: 0.92 AV: 1 SB: 12 0.59-0.87 , 1.12-1.38 NL: 4.50E5  
 F: FTMS - p ESI Full ms2 191.00@hcd33.33 [50.00-215.00]

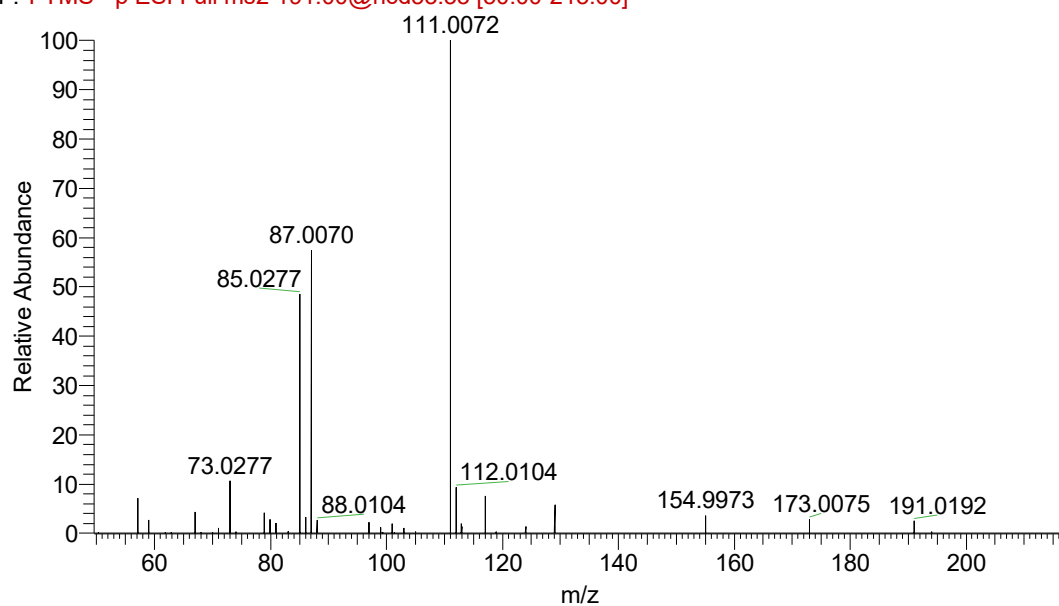

neg-2 #317-358 RT: 1.26-1.33 AV: 2 NL: 2.17E7  
 F: FTMS - p ESI Full ms2 191.0184@hcd26.00 [50.0000-215.0000]

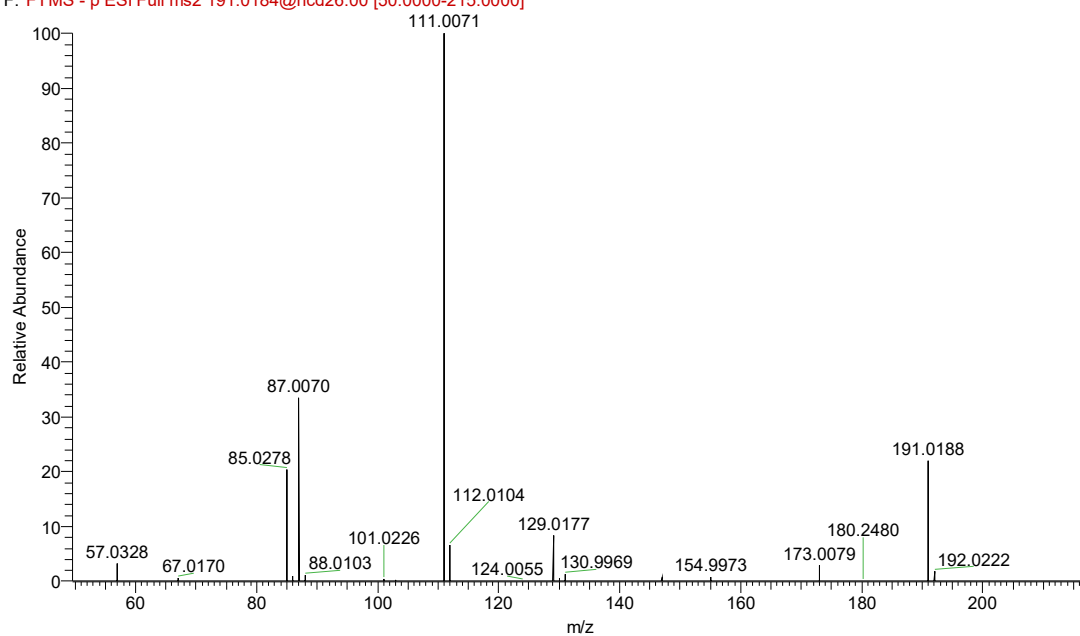

Figure S35. The MS/MS spectrum at  $m/z$  191.0192 (Table S13) identifies it as citric acid when compared with the standard given in the standard citric acid (below).

## SI References

1. A. Wojakowska, M. Chekan, P. Widlak, M. Pietrowska, Application of metabolomics in thyroid cancer research. *Int. J. Endocrinol* 2015, 258763-258763 (2015).
2. S. Ishikawa et al., Increased Expression of Phosphatidylcholine (16:0/18:1) and (16:0/18:2) in Thyroid Papillary Cancer. *PLoS One* 7, e48873 (2012).
3. M. Nipp et al., S100-A10, thioredoxin, and S100-A6 as biomarkers of papillary thyroid carcinoma with lymph node metastasis identified by MALDI imaging. *J. Mol. Med* 90, 163-174 (2012).
4. S. Guo et al., Tissue imaging and serum lipidomic profiling for screening potential biomarkers of thyroid tumors by matrix-assisted laser desorption/ionization-Fourier transform ion cyclotron resonance mass spectrometry. *Anal. Bioanal. Chem* 406, 4357-4370 (2014).
5. K.-W. Min et al., Imaging mass spectrometry in papillary thyroid carcinoma for the identification and validation of biomarker proteins. *J. Korean Med. Sci* 29, 934-940 (2014).
6. F. Pagni et al., Proteomics in thyroid cytopathology: Relevance of MALDI-imaging in distinguishing malignant from benign lesions. *Proteomics* 16, 1775-1784 (2016).
7. M. Pietrowska et al., Molecular profiles of thyroid cancer subtypes: Classification based on features of tissue revealed by mass spectrometry imaging. *Biochim. Biophys. Acta* 1865, 837-845 (2017).
8. M. Galli et al., Proteomic profiles of thyroid tumors by mass spectrometry-imaging on tissue microarrays. *Biochim. Biophys. Acta* 1865, 817-827 (2017).
9. J. Zhang et al., Cardiolipins Are Biomarkers of Mitochondria-Rich Thyroid Oncocytic Tumors. *Cancer Res* 76, 6588-6597 (2016).
10. J. Zhang et al., Detection of Metastatic Breast and Thyroid Cancer in Lymph Nodes by Desorption Electrospray Ionization Mass Spectrometry Imaging. *J. Am. Soc. Mass Spectrom* 28, 1166-1174 (2017).
11. R. J. DeHoog et al., Preoperative metabolic classification of thyroid nodules using mass spectrometry imaging of fine-needle aspiration biopsies. *P.Natl. Acad. Sci. USA* 116, 21401-21408 (2019).
